# Supplementary material for: RNAi Screen for NRF2 Inducers Identifies Targets That Rescue Primary Lung Epithelial Cells from Cigarette Smoke Induced Radical Stress
Source: PLoS One. 2016 Nov 10;11(11):e0166352. doi: 10.1371/journal.pone.0166352 (PMC5104413; doi:10.1371/journal.pone.0166352)
Supplement: S1 Table — Screening hits are marked in grey. (XLSX) [file pone.0166352.s001.xlsx]

## Sheet: Sheet1
gene_acc	gene_name	mean normalized Luc induction (% of controls)	SD	mean Luciferase induction/number of nuclei	mean normalized number of nuclei (% of control)	SD	mean normalized nuclear condensation index (% of controls)	SD	rank by normalized luciferase induction	rank luc/number of nuclei
1659	DHX8	226.168	81.4412	2.44079	92.662	1.78391	134.448	19.5223	1	5
7172	TPMT	183.303	9.17418	2.0491	89.455	3.34779	109.325	17.3074	2	10
10922	FASTK	181.997	10.8073	2.15874	84.3069	7.3652	115.756	20.9251	3	8
9024	BRSK2	180.889	13.5935	1.9952	90.6617	7.03043	161.486	19.2287	4	11
10622	POLR3G	179.576	1.86552	2.0777	86.4301	4.6994	134.391	16.3861	5	9
23049	SMG1	176.76	17.8705	1.78678	98.9263	10.3493	99.1897	8.66153	6	18
56623	INPP5E	171.394	13.7973	1.74408	98.2719	2.29018	129.763	24.2777	7	24
8648	NCOA1	169.975	6.56966	1.53267	110.901	8.62215	104.925	18.9926	8	51
7323	UBE2D3	169.897	13.0698	2.19197	77.5089	1.51683	149.815	21.8363	9	7
6895	TARBP2	168.533	9.71258	1.92744	87.4388	6.77327	125.824	16.3562	10	12
27036	SIGLEC7	165.026	10.3988	1.58632	104.03	9.78837	110.692	19.0602	11	41
103	ADAR	160.665	21.0266	1.68011	95.6273	4.12241	129.052	18.6533	12	30
5195	PEX14	159.633	58.7628	1.50805	105.854	2.87215	151.821	22.2394	13	55
4074	M6PR	159.592	6.98459	1.8659	85.5308	10.3206	121.55	35.329	14	16
5701	PSMC2	159.556	29.3604	1.75157	91.0933	12.5097	119.423	36.1174	15	23
10856	RUVBL2	159.237	9.96161	1.68626	94.4321	3.23031	91.0876	8.99631	16	27
390	RND3	157.971	41.7473	1.76227	89.6408	5.82661	76.2954	4.03655	17	22
387700	SLC16A12	155.948	10.0523	1.53789	101.404	7.25992	71.2635	9.16812	18	49
2677	GGCX	154.618	16.0542	1.7733	87.1922	12.8287	94.7745	19.0794	19	19
1869	E2F1	154.151	13.7277	1.56951	98.2156	5.01459	146.504	21.3097	20	45
2581	GALC	153.406	28.4279	1.76902	86.7182	3.49792	118.978	10.001	21	21
1861	TOR1A	152.86	18.4461	1.53366	99.6701	11.0038	105.969	13.259	22	50
8500	PPFIA1	152.68	37.2329	1.37615	110.948	9.62247	115	11.7837	23	121
5783	PTPN13	152.669	10.173	1.63552	93.3459	8.69233	120.539	16.3482	24	35
381	ARF5	152.506	1.68111	1.43763	106.082	6.99496	130.714	24.0735	25	85
9931	HELZ	151.872	44.4808	1.50241	101.086	1.41642	94.8637	3.47614	26	58
83937	RASSF4	150.686	34.6024	1.38601	108.719	4.10178	87.1798	13.1074	27	113
9651	PLCH2	150.374	6.52986	1.49631	100.496	18.4183	130.215	6.71137	28	61
9628	RGS6	149.421	28.0544	2.62848	56.847	9.62397	203.828	38.3271	29	4
2563	GABRD	149.153	5.8929	1.62106	92.0093	3.91635	161.247	22.6693	30	37
347734	SLC35B2	149.053	14.0424	1.23655	120.54	3.24428	103.75	31.6883	31	305
26121	PRPF31	149.014	7.90833	1.57607	94.5476	2.88305	139.935	21.8267	32	43
6633	SNRPD2	148.219	53.1728	1.43158	103.536	3.50838	118.057	22.3812	33	89
5883	RAD9A	147.643	48.7963	1.36997	107.771	1.76901	127.976	31.2164	34	124
10859	LILRB1	147.41	10.0273	1.86769	78.9263	5.1241	137.888	13.8667	35	15
2475	FRAP1	145.568	11.7095	1.71404	84.9269	3.60651	158.016	122.153	36	25
225689	MAPK15	144.495	19.3898	1.343	107.591	2.3008	94.8191	1.91669	37	153
6839	SUV39H1	144.316	18.6145	1.64294	87.8397	2.84785	122.412	16.229	38	34
79042	TSEN34	144.228	16.6795	1.21001	119.196	1.86693	62.467	17.6943	39	394
408	ARRB1	143.833	7.06924	1.18888	120.982	11.0165	103.031	6.69595	40	467
488	ATP2A2	143.545	12.8443	1.40505	102.164	1.43212	103.364	9.91417	41	105
7388	UQCRH	143.439	5.0636	1.16973	122.625	19.1722	105.487	37.1068	42	529
10587	TXNRD2	143.275	6.87709	1.52695	93.8309	4.46716	123.941	16.4276	43	52
54504	CPVL	143.257	13.8941	1.38039	103.78	4.50679	110.635	15.2007	44	118
9343	EFTUD2	143.145	34.348	1.4996	95.4552	8.73331	125.061	7.92602	45	59
10299	MARCH6	142.599	12.2848	1.36393	104.55	4.29193	153.068	20.7379	46	132
7415	VCP	141.824	10.1679	1.16013	122.248	5.59809	83.9722	4.12538	47	569
9188	DDX21	141.692	45.8593	1.4116	100.377	8.42301	124.074	10.6183	48	98
79739	TTLL7	141.68	46.8487	1.41777	99.9313	7.20867	86.3079	16.2805	49	95
3597	IL13RA1	141.647	41.3611	1.27566	111.038	7.44502	94.1002	6.99635	50	240
54510	PCDH18	141.635	15.1652	1.47734	95.8714	15.8099	244.459	77.3325	51	70
11245	GPR176	141.545	5.6432	1.40523	100.728	4.29264	113.81	13.5176	52	104
8710	SERPINB7	141.374	14.1697	1.43957	98.2064	1.04258	145.233	7.90918	53	84
411	ARSB	141.265	7.27451	1.29421	109.152	7.35941	81.3552	8.97761	54	205
5700	PSMC1	140.272	27.8192	1.51844	92.379	1.74867	172.559	2.58683	55	53
5708	PSMD2	140.192	4.90216	1.49099	94.0261	14.0111	146.971	91.5558	56	65
2872	MKNK2	140.158	4.15595	1.36884	102.391	5.5866	112.585	11.0868	57	126
26958	COPG2	139.758	20.5688	1.46969	95.0939	3.23904	107.671	11.224	58	72
4920	ROR2	139.655	4.83485	1.38408	100.901	2.81358	107.49	8.49293	59	116
4943	TBC1D25	139.646	9.72926	1.62445	85.9656	8.33205	239.368	30.8725	60	36
90990	KIFC2	139.553	13.5707	1.65909	84.1141	5.31767	216.072	46.0337	61	33
1612	DAPK1	139.288	27.35	1.40503	99.1354	5.8862	95.5029	17.54	62	106
1428	CRYM	139.072	18.767	1.1908	116.788	5.84498	86.9617	13.1406	63	455
374875	HSD11B1L	138.612	13.239	1.23654	112.097	11.6036	150.838	10.3591	64	306
55486	PARL	138.498	24.5857	1.48977	92.966	1.03489	138.76	41.42	65	66
85015	USP45	138.201	27.1078	1.27591	108.316	3.52353	100.995	24.9158	66	239
8314	BAP1	138.032	3.88007	1.54902	89.1095	8.75196	203.137	63.8598	67	47
23228	PLCL2	137.585	14.6551	1.46006	94.2323	3.82505	144.491	13.0926	68	77
60468	BACH2	137.474	7.98394	1.68443	81.6145	4.77328	84.2174	6.98875	69	28
9953	HS3ST3B1	137.3	3.12932	1.44557	94.9797	7.19194	151.674	35.4457	70	81
66005	CHID1	137.194	11.0699	1.08713	126.198	10.4866	81.6487	25.4776	71	960
81502	HM13	136.799	28.8188	1.21411	112.674	5.19759	85.6987	9.38962	72	380
4439	MSH5	136.755	17.4279	1.31712	103.829	5.84748	114.126	31.2541	73	182
4249	MGAT5	136.609	9.59977	1.42625	95.782	2.1922	111.291	9.46405	74	91
6654	SOS1	136.11	41.1105	1.18898	114.476	6.27278	113.038	6.6778	75	466
6781	STC1	135.735	16.3453	1.51064	89.8526	0.85467	104.466	18.4137	76	54
107	ADCY1	135.582	2.46475	1.38283	98.0464	4.98594	120.491	29.1319	77	117
2643	GCH1	135.455	19.402	1.35615	99.8817	9.53804	92.9905	5.18427	78	137
5511	PPP1R8	135.441	11.8512	1.28412	105.474	3.41141	88.8654	11.2217	79	227
79623	GALNT14	135.377	9.33237	1.3279	101.949	8.55331	113.302	13.171	80	165
23765	IL17RA	135.138	15.1473	1.469	91.9932	6.01999	155.834	9.77733	81	73
867	CBL	134.996	4.10636	1.31444	102.702	6.99672	96.3888	7.45187	82	185
84547	PGBD1	134.882	17.2666	1.49471	90.2391	3.33513	76.98	6.32406	83	62
57165	GJC2	134.871	6.07772	1.46881	91.8234	6.50712	107.844	22.4114	84	74
8803	SUCLA2	134.801	41.7489	1.26602	106.477	3.74024	95.924	9.69292	85	259
6047	RNF4	134.763	27.2094	1.32522	101.691	11.0069	88.4074	2.049	86	170
2173	FABP7	134.591	9.00479	1.46879	91.634	3.53269	142.801	25.7013	87	75
11020	RABL4	134.527	9.83271	1.41462	95.0975	6.97218	151.188	61.6947	88	97
571	BACH1	134.304	9.06768	1.30097	103.234	19.8557	80.0487	15.0207	89	195
50807	ASAP1	134.278	5.3904	1.368	98.1565	1.33228	101.485	9.96171	90	127
10221	TRIB1	134.261	29.2813	1.44216	93.0969	1.79004	91.6596	24.7083	91	83
330	BIRC3	134.257	22.621	1.33907	100.261	6.94842	97.4819	21.8637	92	156
23161	SNX13	134.005	12.1936	1.35824	98.6608	2.2548	131.93	7.99735	93	135
9616	RNF7	133.191	20.105	1.28006	104.051	4.44481	108.854	19.9409	94	232
25898	RCHY1	133.156	18.8099	1.39025	95.779	4.69187	135.891	30.3385	95	110
56949	XAB2	133.076	13.7666	1.2786	104.08	2.02585	102.037	10.17	96	235
5033	P4HA1	133.064	6.23277	1.3898	95.7431	4.81519	83.6484	3.35752	97	111
1299	COL9A3	133.034	38.1823	1.32772	100.198	6.25105	153.426	17.8711	98	166
23646	PLD3	132.948	23.7933	1.24186	107.055	7.1395	84.939	12.4626	99	292
3752	KCND3	132.933	11.7855	1.26998	104.674	4.84865	114.055	8.45463	100	249
55640	FLVCR2	132.766	4.62417	1.2937	102.625	5.73328	100.328	11.7839	101	207
6674	SPAG1	132.754	25.5729	1.40917	94.2069	6.94286	110.601	12.0125	102	101
5129	PCTK3	132.744	3.19137	1.36587	97.1864	7.87896	116.625	20.7081	103	129
4833	NME4	132.383	8.38579	1.35322	97.8276	6.25829	122.247	31.6517	104	142
5947	RBP1	132.246	2.99209	1.91937	68.901	58.7469	455.689	588.182	105	13
5251	PHEX	132.141	12.7292	1.60911	82.1207	11.1014	110.69	18.1587	106	38
4946	OAZ1	132.132	7.20107	1.2795	103.269	4.41889	163.804	20.8398	107	233
5998	RGS3	132.096	11.8523	1.35824	97.2557	1.69166	104.143	9.80824	108	134
55699	IARS2	131.746	13.0409	1.13898	115.67	4.15828	79.5232	11.8869	109	666
9517	SPTLC2	131.722	12.5507	1.19017	110.675	11.1642	111.892	18.4416	110	459
23564	DDAH2	131.621	6.24419	1.25164	105.159	3.2714	113.459	16.7253	111	278
1123	CHN1	131.616	4.77112	1.37842	95.483	5.01547	112.1	14.9387	112	120
23583	SMUG1	131.31	20.8007	1.3393	98.0444	2.47362	128.901	6.39749	113	155
6785	ELOVL4	131.18	1.22563	1.32017	99.366	5.99465	89.8417	24.4334	114	178
7060	THBS4	131.144	9.29135	1.31845	99.468	4.46385	157.591	33.9238	115	179
84926	SPRYD3	130.94	7.49199	1.12906	115.973	7.72151	79.0439	13.5951	116	703
56895	AGPAT4	130.871	12.3552	1.38521	94.4772	8.65584	85.7729	19.0069	117	115
113189	CHST14	130.676	15.1632	1.31804	99.1439	4.9605	82.9519	8.60389	118	181
114609	TIRAP	130.522	1.04685	1.16998	111.559	8.1676	138.913	22.3891	119	526
5190	PEX6	130.483	15.7085	1.31543	99.1942	12.127	119.976	24.6933	120	184
23510	KCTD2	130.471	3.59171	1.2697	102.758	2.19816	67.1011	13.5864	121	252
2109	ETFB	130.26	31.5487	1.90321	68.4423	20.293	161.978	14.0316	122	14
83714	NRIP2	130.253	20.292	1.29314	100.726	18.4568	171.047	28.0341	123	210
55743	CHFR	130.249	24.5648	1.31844	98.7899	2.57179	114.878	9.07281	124	180
29925	GMPPB	130.171	41.8789	1.44534	90.0622	2.05653	184.564	44.3528	125	82
23589	CARHSP1	130.165	48.4701	1.32553	98.1983	0.841304	155.729	59.8217	126	168
6632	SNRPD1	130.087	14.5424	1.25541	103.621	9.46302	117.511	27.2638	127	275
51199	NIN	129.964	8.96949	1.4113	92.0885	5.22266	104.931	24.4354	128	99
4884	NPTX1	129.916	4.61017	1.15241	112.735	4.57243	109.682	5.72577	129	605
4350	MPG	129.758	34.4407	1.23191	105.331	1.51998	129.88	9.95957	130	315
9530	BAG4	129.564	10.1565	1.3694	94.6141	7.87385	193.34	12.1615	131	125
10430	TMEM147	129.325	8.24261	1.24967	103.487	2.95881	113.664	5.90628	132	281
5704	PSMC4	128.707	4.00218	1.28212	100.387	9.89309	92.6826	11.5642	133	229
1950	EGF	128.427	11.5613	1.03237	124.401	11.4579	93.0858	16.7651	134	1405
11231	SEC63	128.383	1.99074	1.05717	121.44	2.76966	101.116	31.8666	135	1187
10998	SLC27A5	128.284	1.24264	1.45982	87.8767	3.06814	72.0233	12.5336	136	78
394	ARHGAP5	128.241	6.27341	1.40938	90.991	6.60368	100.042	10.5	137	100
391365	SULT6B1	128.237	12.2995	1.1397	112.518	10.0286	130.21	27.8366	138	662
9578	CDC42BPB	128.138	16.6752	1.34515	95.2594	2.9921	101.452	30.8118	139	148
1384	CRAT	128.128	15.1702	1.2372	103.563	4.11441	86.3719	19.85	140	302
7249	TSC2	127.887	2.57911	1.34399	95.1545	6.48751	108.767	3.96668	141	150
55644	OSGEP	127.619	14.9347	1.35183	94.404	2.37613	94.7541	19.724	142	144
6541	SLC7A1	127.352	16.1209	1.32174	96.3521	5.2445	140.903	5.09422	143	176
1261	CNGA3	127.293	9.99429	1.40474	90.6164	7.43913	82.0292	17.8558	144	107
63915	MUTED	127.273	12.321	1.42801	89.1264	8.52546	93.9429	14.9696	145	90
51095	TRNT1	127.273	30.082	1.46025	87.1586	10.2279	80.1246	6.68612	146	76
3604	TNFRSF9	127.238	9.53148	1.21721	104.532	10.9072	85.0747	12.0666	147	370
349667	RTN4RL2	127.133	13.2733	1.09079	116.551	18.1107	95.4329	12.8288	148	932
4688	NCF2	127.109	37.7445	1.14619	110.898	6.74367	94.0811	9.90185	149	629
2204	FCAR	127.05	14.5346	1.18016	107.655	2.96811	109.081	5.50881	150	497
11018	TMED1	127.009	8.30381	1.24792	101.777	8.45994	124.008	3.04089	151	286
54549	SDK2	126.744	7.29143	1.16476	108.815	2.61862	90.6881	11.0212	152	550
23432	GPR161	126.591	7.01369	1.29966	97.4027	5.71763	133.908	65.8676	153	198
5300	PIN1	126.53	32.6514	1.22534	103.261	2.88505	92.7525	10.7386	154	336
25942	SIN3A	126.485	4.46142	1.13811	111.137	4.71742	100.821	11.5165	155	672
64072	CDH23	126.478	2.87824	1.20604	104.87	9.26796	86.5059	20.467	156	406
11021	RAB35	126.424	6.92482	1.31689	96.0019	5.23213	168.11	42.9148	157	183
10089	KCNK7	126.399	17.0747	1.33134	94.941	20.0499	142.673	41.1216	158	159
81033	KCNH6	126.383	21.6664	1.32534	95.3587	2.02805	93.6479	27.4428	159	169
9364	RAB28	126.184	7.35526	1.67897	75.1555	15.2295	167.194	30.4099	160	31
4142	MAS1	126.158	43.0071	1.12169	112.472	7.92328	83.6211	13.6653	161	744
4716	NDUFB10	126.115	35.5667	1.37565	91.6766	1.32669	141.202	15.1605	162	122
112885	PHF21B	125.988	22.9919	1.13902	110.611	4.61394	93.303	6.61267	163	665
259230	SGMS1	125.93	10.5893	1.33026	94.6658	4.01418	102.316	18.6328	164	162
9583	ENTPD4	125.895	11.8895	1.09576	114.893	9.5376	137.628	8.69557	165	890
3781	KCNN2	125.815	11.0064	1.221	103.043	12.8114	106.788	26.601	166	347
5745	PTHR1	125.652	2.19982	1.2923	97.2309	10.0541	186.109	54.2568	167	213
55775	TDP1	125.591	12.4323	1.15319	108.907	6.08882	93.5637	10.168	168	600
146760	RTN4RL1	125.523	17.2063	1.0872	115.456	13.5077	82.5143	6.20285	169	959
2717	GLA	125.499	5.95464	1.2922	97.1203	5.48541	140.191	13.7805	170	214
8405	SPOP	125.448	7.41028	1.30588	96.0639	6.556	107.733	18.6531	171	190
2235	FECH	125.411	7.01142	1.77305	70.732	45.9634	53.9386	66.6015	172	20
5570	PKIB	125.399	7.0662	1.21797	102.957	3.53065	120.137	16.4466	173	366
64764	CREB3L2	125.395	11.9085	1.24282	100.895	4.17249	84.4301	4.48177	174	291
8227	SFRS17A	125.337	5.05566	1.22469	102.342	5.19325	121.769	22.9348	175	339
4839	NOL1	125.307	5.3224	1.24499	100.649	4.63425	92.9173	14.0873	176	289
3800	KIF5C	125.3	2.86019	1.1834	105.881	6.266	64.7735	8.40137	177	488
353174	ZACN	125.21	13.4683	1.09675	114.165	3.60934	103.784	23.3649	178	885
10846	PDE10A	125.2	6.10471	1.19841	104.472	9.12239	127.991	13.2175	179	432
64089	SNX16	125.161	45.3435	1.19739	104.528	4.36208	101.57	13.0417	180	435
10063	COX17	125.094	7.14104	1.26903	98.5747	4.15545	125.242	37.9153	181	254
51015	ISOC1	124.915	11.8186	1.28906	96.904	1.80966	134.422	8.10862	182	219
51076	CUTC	124.907	21.4002	1.19896	104.18	3.44667	163.859	14.9727	183	430
2797	GNRH2	124.835	27.6313	1.21594	102.665	4.8824	96.0888	29.206	184	374
340371	NRBP2	124.68	16.8824	1.32259	94.2692	7.59137	83.3166	6.05399	185	173
30844	EHD4	124.679	15.6324	1.15449	107.995	3.70717	86.1952	7.98482	186	593
9997	SCO2	124.647	15.7656	1.21905	102.25	4.47524	94.3675	6.70684	187	355
23162	MAPK8IP3	124.626	13.7684	1.39515	89.3284	5.70282	108.796	30.2184	188	108
3630	INS	124.493	10.8058	1.05364	118.155	9.89409	128.18	6.61017	189	1212
301	ANXA1	124.48	10.0779	1.16481	106.868	3.21665	107.135	8.83023	190	548
9978	RBX1	124.476	47.8375	1.2073	103.103	4.68445	93.4579	7.7172	191	403
3636	INPPL1	124.461	27.2168	1.27674	97.4832	2.02538	105.206	12.9911	192	237
10149	GPR64	124.447	12.7328	1.17332	106.064	5.66032	81.6688	18.2123	193	519
4355	MPP2	124.379	2.9636	1.27765	97.35	7.6226	108.148	19.529	194	236
5214	PFKP	124.268	6.65661	1.2187	101.968	2.76506	107.348	17.0896	195	359
1445	CSK	124.264	10.7711	1.25874	98.7208	4.10158	100.863	23.7099	196	271
55794	DDX28	124.171	8.31241	1.20216	103.29	6.96279	121.243	20.5544	197	417
8541	PPFIA3	124.161	24.3751	1.27627	97.2838	4.35261	123.752	7.21646	198	238
81858	SHARPIN	124.107	13.5736	1.32237	93.8519	2.01308	115.444	25.3605	199	174
7075	TIE1	124.099	45.4853	1.19357	103.974	5.84395	107.002	9.6756	200	445
51386	EIF3EIP	124.096	10.0497	1.27371	97.4283	3.50392	98.7935	9.74002	201	242
8503	PIK3R3	124.018	2.46472	1.22783	101.006	1.39033	138.789	21.083	202	323
56886	UGCGL1	123.969	18.0335	1.32865	93.3047	6.19237	162.388	31.3796	203	163
329	BIRC2	123.939	9.90358	1.39061	89.1258	3.75393	129.596	9.07327	204	109
51655	RASD1	123.938	16.979	1.16839	106.076	7.09639	94.0484	3.7233	205	534
2011	MARK2	123.851	10.614	1.42453	86.9416	3.21399	181.996	13.2027	206	92
3428	IFI16	123.75	11.7829	1.18741	104.218	5.81819	93.6102	10.0046	207	475
84101	USP44	123.623	6.23198	1.19729	103.253	1.79838	125.794	35.8382	208	436
220032	GDPD4	123.622	37.2965	1.17556	105.16	8.92719	88.9906	10.5562	209	516
7064	THOP1	123.512	3.64006	1.15322	107.102	6.6215	102.433	12.0693	210	599
9175	MAP3K13	123.508	12.0364	1.20435	102.552	6.17245	94.1297	20.917	211	413
23552	CCRK	123.434	1.51377	1.21311	101.751	6.31818	130.97	17.4907	212	385
8208	CHAF1B	123.426	41.815	1.22037	101.138	6.5716	100.464	3.44753	213	349
6647	SOD1	123.35	6.79212	1.36461	90.3922	8.9932	209.01	88.1035	214	130
5101	PCDH9	123.349	4.40693	1.20435	102.42	4.78502	113.954	17.1414	215	412
994	CDC25B	123.295	5.576	1.21539	101.445	2.85035	94.0419	15.077	216	377
55229	PANK4	123.284	2.56521	1.21885	101.148	4.99775	91.5394	7.07108	217	356
23522	MYST4	123.252	1.78365	1.1808	104.381	5.39655	106.803	15.1108	218	494
338567	KCNK18	123.183	4.53411	1.27015	96.9826	6.17549	147.737	20.0583	219	248
4650	MYO9B	123.124	11.1844	1.20305	102.343	12.9108	134.826	31.6136	220	414
5705	PSMC5	123.079	12.3959	1.26082	97.6182	2.64573	121.674	31.8774	221	267
1525	CXADR	123.021	13.3253	1.24948	98.4571	7.90787	98.8483	18.9524	222	282
51128	SAR1B	123.016	3.90225	1.4826	82.9732	4.09215	99.9791	9.35363	223	68
8826	IQGAP1	122.968	15.6086	1.32291	92.9526	9.24361	109.653	13.0698	224	172
26151	NAT9	122.876	4.93006	1.21799	100.884	4.08735	80.232	15.7103	225	365
5426	POLE	122.871	40.3162	1.49137	82.388	5.15196	91.8921	16.3571	226	64
2186	BPTF	122.788	12.6886	1.53926	79.7706	8.90972	181.836	45.3866	227	48
29899	GPSM2	122.769	44.8783	1.19286	102.92	1.4305	113.544	10.0961	228	450
55930	MYO5C	122.67	2.7865	1.27905	95.9074	7.95273	88.6717	26.5507	229	234
4854	NOTCH3	122.669	28.3685	1.23454	99.3646	1.50353	94.4041	4.96279	230	307
51005	AMDHD2	122.598	30.7233	1.18645	103.332	10.1731	103.066	27.1449	231	479
64130	LIN7B	122.589	12.0678	1.21951	100.523	10.3801	105.881	8.8832	232	352
1138	CHRNA5	122.53	14.6692	1.136	107.861	0.359857	92.0088	13.1512	233	680
79085	SLC25A23	122.504	47.5441	1.68099	72.8763	7.07095	169.547	20.9678	234	29
399979	SNX19	122.498	11.2342	1.14517	106.969	5.46215	85.4899	4.30608	235	635
11282	MGAT4B	122.45	11.1046	1.20864	101.312	1.89237	88.9597	3.48781	236	397
5706	PSMC6	122.447	5.36827	1.20614	101.52	3.12719	119.881	34.3496	237	405
3783	KCNN4	122.441	9.69514	1.22975	99.566	9.35926	127.49	47.1035	238	317
6699	SPRR1B	122.337	11.3274	1.24074	98.6001	5.52369	118.333	27.9132	239	294
2987	GUK1	122.316	8.30507	1.21881	100.357	3.26388	101.475	8.69265	240	358
2286	FKBP2	122.287	12.9684	1.21863	100.347	2.23903	206.196	63.3595	241	361
1938	EEF2	122.203	6.80656	1.01717	120.141	2.56354	78.2293	8.64644	242	1559
64342	HS1BP3	122.134	11.5023	1.24991	97.7144	8.60235	95.2178	17.6775	243	280
9620	CELSR1	122.094	4.11442	1.14275	106.842	12.9471	144.306	51.5683	244	647
5905	RANGAP1	122.022	22.9826	1.31153	93.038	3.64841	192.697	57.0775	245	187
8402	SLC25A11	121.867	7.68408	1.22565	99.4299	6.71743	103.676	13.119	246	335
3635	INPP5D	121.826	9.75396	1.35464	89.9322	6.72011	192.103	10.2172	247	141
339906	TESSP2	121.824	11.1002	1.24513	97.8399	5.13309	87.3331	2.53829	248	288
51686	OAZ3	121.801	26.9898	1.43501	84.8783	18.1429	134.382	14.8146	249	87
23647	ARFIP2	121.755	9.76984	1.24294	97.9573	6.54889	109.498	9.69586	250	290
991	CDC20	121.637	33.5664	1.16106	104.764	2.80373	130.954	23.8857	251	561
55374	TMCO6	121.618	2.93846	1.18686	102.47	14.3786	72.284	5.95589	252	478
55707	NECAP2	121.617	21.4031	1.14288	106.413	5.00824	87.3584	10.0525	253	646
5826	ABCD4	121.546	6.22846	1.21983	99.6421	0.606527	119.37	9.37683	254	350
7874	USP7	121.476	14.2599	1.58002	76.8824	6.16547	121.166	7.33545	255	42
84885	ZDHHC12	121.402	8.95475	1.17723	103.125	1.2911	87.5489	9.09219	256	508
5211	PFKL	121.333	5.26965	1.16576	104.081	4.87591	101.233	15.1428	257	544
9189	ZBED1	121.312	14.4356	1.15709	104.843	10.0116	91.6861	3.60593	258	579
64170	CARD9	121.3	2.80449	1.09334	110.945	7.76314	110.397	15.3162	259	906
10954	PDIA5	121.251	14.8718	1.26352	95.9634	7.8211	142.997	20.6242	260	261
4058	LTK	121.204	11.5991	1.29677	93.466	6.40055	96.345	8.64854	261	202
84264	HAGHL	121.145	4.55821	1.15323	105.049	3.93592	87.6134	21.6416	262	598
11039	SMA4	121.057	6.59278	1.10997	109.064	3.87145	127.088	22.7745	263	811
5689	PSMB1	120.988	1.46607	1.26429	95.6966	9.44162	106.925	50.8599	264	260
10566	AKAP3	120.924	6.80947	1.26895	95.2945	2.63194	92.2922	9.00006	265	255
80059	LRRTM4	120.865	3.2075	1.41971	85.1337	33.0586	112.412	30.8958	266	94
1506	CTRL	120.843	18.7974	1.19383	101.223	1.88899	109.063	16.1657	267	443
6509	SLC1A4	120.779	15.4269	1.24749	96.8181	5.07006	132.191	6.65931	268	287
1002	CDH4	120.715	11.5296	1.2267	98.4065	10.8114	91.7099	8.78101	269	327
440	ASNS	120.658	6.51484	1.17015	103.113	3.24363	88.0271	11.2751	270	525
6627	SNRPA1	120.652	4.26704	1.18901	101.472	4.1842	109.19	10.9686	271	465
10043	TOM1	120.645	10.5069	1.20201	100.369	5.87078	104.581	20.9034	272	418
64429	ZDHHC6	120.565	9.29703	1.22708	98.2529	1.4026	98.3865	7.2106	273	326
54704	PPM2C	120.546	7.57815	1.26053	95.6316	8.56747	118.341	26.502	274	268
25820	ARIH1	120.517	6.57649	1.26722	95.1037	3.38583	100.373	37.8094	275	258
9531	BAG3	120.471	4.11	1.30042	92.6398	4.12647	102.012	12.364	276	196
2280	FKBP1A	120.289	8.58632	1.35515	88.7646	6.219	122.451	21.4705	277	140
353091	RAET1G	120.275	13.5898	1.20457	99.8494	13.1735	172.052	46.0743	278	410
3766	KCNJ10	120.172	2.60315	1.04343	115.17	8.34689	70.9954	4.27759	279	1304
51451	LCMT1	120.14	13.7081	1.21473	98.9029	3.61089	128.628	11.0743	280	378
114569	MAL2	120.12	11.7027	1.04611	114.826	12.3654	206.283	19.3861	281	1282
4696	NDUFA3	120.036	27.6473	1.36697	87.8112	29.8618	196.407	62.019	282	128
26524	LATS2	119.984	6.64293	1.18615	101.154	5.51044	91.6272	15.1767	283	480
25921	ZDHHC5	119.967	1.00321	1.14667	104.622	9.06358	82.5447	8.43069	284	628
22883	CLSTN1	119.871	1.18448	1.28673	93.1593	2.86019	99.6426	14.5796	285	222
25800	SLC39A6	119.787	2.62989	1.28438	93.2646	1.268	99.3085	13.996	286	226
10013	HDAC6	119.778	8.38213	1.19943	99.8626	4.91765	107.781	18.8039	287	429
27301	APEX2	119.736	8.90315	1.18163	101.331	2.76526	101.187	5.93232	288	493
64411	ARAP3	119.73	7.45114	1.16094	103.131	6.11386	91.9555	2.61488	289	562
27343	POLL	119.706	7.34464	1.18877	100.697	7.0134	99.6468	12.8879	290	469
86	ACTL6A	119.654	20.4516	1.22842	97.4045	1.39111	112.149	20.3363	291	320
5127	PCTK1	119.516	6.06247	1.21344	98.4934	6.86629	125.437	7.08045	292	384
81796	SLCO5A1	119.436	47.448						293	9000
5256	PHKA2	119.414	12.0695	1.21133	98.5808	5.20586	154.085	34.95	294	389
11000	SLC27A3	119.393	2.02111	1.22277	97.6415	7.1752	135.828	22.3291	295	344
23192	ATG4B	119.391	16.232	1.33113	89.6919	5.127	115.635	20.1941	296	160
3601	IL15RA	119.32	9.19506	1.10589	107.895	6.58944	86.9998	8.50239	297	836
386724	AMIGO3	119.311	13.8069	1.09117	109.342	9.21344	84.8456	13.0833	298	928
1723	DHODH	119.256	3.52891	1.08177	110.242	1.8275	103.089	30.9439	299	1003
7704	ZBTB16	119.21	0.62654	1.08057	110.321	4.13547	128.256	15.1595	300	1010
57678	GPAM	119.197	3.23454	1.1431	104.276	5.17045	196.671	43.7	301	644
2664	GDI1	119.142	9.20539	1.17662	101.258	6.56779	85.9197	9.39183	302	511
4437	MSH3	119.104	4.34569	1.09553	108.718	1.56817	100.518	5.87962	303	892
22985	ACIN1	119.102	5.13236	1.27337	93.5324	3.4868	103.941	31.8565	304	243
7915	ALDH5A1	119.059	3.44906	1.13597	104.808	2.33405	127.183	28.2911	305	681
8493	PPM1D	118.965	8.42533	1.1551	102.991	19.4244	95.3973	23.6861	306	589
56913	C1GALT1	118.96	3.54094	1.02312	116.271	0.842818	89.9876	15.207	307	1499
22901	ARSG	118.881	4.0247	2.4164	49.1975	7.60139	224.211	31.4212	308	6
2519	FUCA2	118.827	7.80277	1.59552	74.4757	14.4432	162.483	45.1766	309	39
122953	JDP2	118.733	31.7	1.14244	103.929	3.5933	89.5178	25.7652	310	649
5817	PVR	118.73	7.29286	1.36067	87.2582	11.8617	85.7268	79.4777	311	133
5315	PKM2	118.725	10.5081	1.22786	96.6929	12.5142	119.673	20.8465	312	322
493	ATP2B4	118.677	10.2091	1.10388	107.509	5.79864	82.6119	14.8933	313	846
25939	SAMHD1	118.636	2.50404	1.21196	97.8875	6.79602	104.302	8.36914	314	388
10671	DCTN6	118.633	9.19571	1.37552	86.2455	4.02789	113.705	16.4049	315	123
56660	KCNK12	118.577	7.11476	1.21676	97.4536	9.3895	97.3294	14.736	316	372
1586	CYP17A1	118.543	6.5589	1.22306	96.9231	4.20036	124.635	6.68283	317	343
23236	PLCB1	118.488	12.7415	1.214	97.6012	2.48773	110.613	19.6756	318	381
6580	SLC22A1	118.423	14.3059	1.09807	107.847	9.59861	86.3419	15.6402	319	881
643394	SPINK9	118.423	8.31902	1.04724	113.082	8.24963	85.2694	23.9645	320	1270
8574	AKR7A2	118.401	11.1626	1.25791	94.1252	6.88821	180.165	30.2288	321	272
145173	B3GALTL	118.398	15.0159	1.00537	117.766	8.43308	84.7739	5.30329	322	1672
1382	CRABP2	118.368	3.69301	1.03648	114.202	9.48125	83.655	5.86694	323	1362
56122	PCDHB14	118.351	24.5836	1.22586	96.5457	0.928438	131.715	36.8411	324	332
11097	NUPL2	118.35	3.1838	1.26279	93.7206	11.4338	186.187	34.7144	325	264
23545	ATP6V0A2	118.333	20.2687	2.88258	41.0511	55.4078	36.4324	56.6314	326	3
23616	SH3BP1	118.259	4.81501	1.07292	110.222	6.2597	75.867	6.6039	327	1070
116	ADCYAP1	118.256	8.99141	1.13687	104.019	2.9085	88.5231	15.2284	328	678
5167	ENPP1	118.221	13.9732	1.33837	88.3319	0.255952	217.867	23.6956	329	157
11183	MAP4K5	118.171	30.8042	1.1699	101.009	6.84954	84.2561	8.01365	330	527
1603	DAD1	118.061	3.11599	1.18329	99.7735	3.55577	109.813	19.5946	331	490
6282	S100A11	117.988	9.16374	1.2993	90.809	1.18508	79.0236	11.9155	332	199
8774	NAPG	117.956	6.48019	1.12819	104.554	2.33135	115.466	24.4999	333	708
11162	NUDT6	117.955	43.088	1.3113	89.9524	9.70147	68.7138	6.43491	334	188
421	ARVCF	117.903	15.8298	1.2161	96.9518	14.9876	95.8664	16.4299	335	373
8125	ANP32A	117.886	3.70087	0.980736	120.201	10.6044	108.943	2.31753	336	1916
4711	NDUFB5	117.882	8.00543	1.16577	101.119	2.01156	122.54	8.54966	337	543
10162	LPCAT3	117.881	2.86209	1.21786	96.7934	10.3382	82.2145	13.9883	338	367
10352	WARS2	117.804	4.27062	1.18878	99.097	3.80192	124.398	8.29786	339	468
5693	PSMB5	117.749	14.3882	1.22496	96.1246	1.24988	125.075	31.3718	340	338
9370	ADIPOQ	117.743	27.6378	1.11604	105.501	3.21269	103.912	29.7036	341	773
79665	DHX40	117.723	13.7198	1.16182	101.326	4.10812	81.902	14.9288	342	558
81559	TRIM11	117.616	8.17838	1.15059	102.222	2.79494	112.885	13.2605	343	615
9806	SPOCK2	117.611	3.93178	1.16914	100.597	2.7913	96.9304	19.1473	344	531
8605	PLA2G4C	117.578	1.49841	1.08378	108.489	1.79651	97.4308	10.1399	345	990
182	JAG1	117.522	8.67395	1.16888	100.542	2.86242	82.0799	15.9901	346	533
10383	TUBB2C	117.376	13.578	1.1654	100.717	4.19593	97.3176	12.0467	347	546
6546	SLC8A1	117.35	25.0111	1.09344	107.322	5.32609	113.187	7.58855	348	905
389	RHOC	117.346	10.7167	1.04053	112.776	15.5343	94.9785	7.11163	349	1326
2794	GNL1	117.33	3.61611	1.13055	103.781	6.66796	113.236	22.7584	350	695
3052	HCCS	117.291	14.4153	1.21856	96.2537	6.52495	84.8388	8.32354	351	362
120526	DNAJC24	117.272	15.3114	1.06709	109.899	6.50162	87.7487	6.51368	352	1112
1360	CPB1	117.225	8.99798	1.19349	98.2202	3.50253	76.0569	17.08	353	447
56649	TMPRSS4	117.216	9.22793	1.24825	93.9043	9.37921	117.869	16.2804	354	284
79575	ABHD8	117.129	3.66159	1.1803	99.237	6.96276	104.989	14.8586	355	496
221458	KIF6	117.106	20.1523	1.32304	88.5123	14.4574	117.571	34.7728	356	171
1829	DSG2	117.016	10.2937	1.02751	113.883	4.29896	93.042	13.4054	357	1452
56980	PRDM10	117.005	6.62515	1.18376	98.8418	2.6659	90.4744	11.868	358	486
7169	TPM2	117.002	1.63757	1.08692	107.646	7.10518	86.9041	3.89543	359	964
4921	DDR2	116.985	7.1531	1.12492	103.994	8.80903	121.835	34.6188	360	725
1244	ABCC2	116.916	19.2748	1.21093	96.55	2.85903	83.3909	6.03636	361	390
147	ADRA1B	116.865	11.5305	1.23892	94.3281	2.67094	106.086	9.76085	362	296
11142	PKIG	116.78	6.98561	1.08514	107.617	5.78548	85.4118	7.65977	363	979
5050	PAFAH1B3	116.748	7.51586	1.2507	93.3462	5.36592	128.342	10.0001	364	279
654429	LRTM2	116.747	15.8358	1.09326	106.788	4.20216	111.09	36.5282	365	908
780	DDR1	116.738	9.67224	1.38014	84.5843	8.89407	291.399	15.6383	366	119
23548	TTC33	116.703	3.30519	1.14368	102.042	3.73266	78.5241	10.7291	367	641
10201	NME6	116.702	3.27145	1.15664	100.897	1.73262	112.254	4.36412	368	580
10518	CIB2	116.689	8.70701	1.03091	113.19	4.86756	99.2874	10.9934	369	1416
8659	ALDH4A1	116.675	2.28586	1.14111	102.246	4.27872	89.6134	27.0024	370	655
1456	CSNK1G3	116.614	5.2083	1.18036	98.7952	9.46705	95.5094	9.02296	371	495
11080	DNAJB4	116.592	12.1943	1.16752	99.8627	3.08402	96.4155	18.2943	372	535
6094	ROM1	116.521	3.82048	1.11297	104.694	6.52403	105.158	11.0697	373	789
414	ARSD	116.521	4.32501	1.23752	94.1566	6.49808	81.036	19.5025	374	301
1510	CTSE	116.513	6.09072	1.22622	95.0187	4.86175	109.987	11.2689	375	329
11132	CAPN10	116.495	42.2464	1.09439	106.448	3.53451	85.3377	7.12699	376	899
9028	RHBDL1	116.469	3.37928	1.142	101.987	2.18343	100.754	13.5066	377	651
9557	CHD1L	116.466	8.14406	1.14139	102.038	0.562409	76.1194	13.1362	378	653
10400	PEMT	116.444	6.63686	1.08381	107.44	2.43716	108.138	22.792	379	989
27034	ACAD8	116.432	18.1964	1.17985	98.6835	14.3766	121.245	13.2278	380	500
3773	KCNJ16	116.383	8.38554	1.28365	90.6654	7.29403	97.7703	15.2678	381	228
256356	GK5	116.357	8.09438	1.20757	96.3557	3.6165	105.743	16.1075	382	402
10570	DPYSL4	116.31	2.18267	1.23298	94.3329	7.20656	181.136	43.961	383	310
7037	TFRC	116.3	10.8616	1.16507	99.8219	8.09502	86.936	14.3931	384	547
84515	MCM8	116.297	17.2679	1.19288	97.4929	2.03498	128.961	46.0479	385	449
1839	HBEGF	116.265	8.57181	1.05796	109.896	1.73196	83.6965	6.40408	386	1178
57099	AVEN	116.196	2.50366	1.11495	104.216	2.76952	81.8932	9.15221	387	781
2956	MSH6	116.185	3.24634	1.04422	111.265	7.02183	101.095	16.2711	388	1297
1806	DPYD	116.179	8.34387	1.12372	103.388	4.50541	101.178	28.2972	389	729
51013	EXOSC1	116.177	14.0685	1.14745	101.248	3.26344	117.791	16.6434	390	627
141	ADPRH	116.165	5.4853	1.18332	98.1685	9.07991	97.677	13.8791	391	489
9509	ADAMTS2	116.103	7.61784	1.1345	102.339	5.89965	97.4468	9.64198	392	682
81846	SBF2	116.101	11.5674	1.14894	101.051	2.24086	120.223	16.7409	393	621
24142	NAT6	116.056	0.293797	1.22766	94.5341	1.34833	262.697	80.3382	394	324
10367	CBARA1	116.046	15.8962	1.29439	89.6532	11.1016	113.957	17.6363	395	204
6447	SCG5	116.039	2.90879	1.14034	101.758	12.1224	134.228	17.9759	396	658
3183	HNRNPC	116.008	2.54747	1.15313	100.603	6.40364	154.204	36.4538	397	601
10217	CTDSPL	116.007	16.4649	1.13717	102.014	2.6328	121.409	10.3618	398	674
57168	ASPHD2	115.996	4.09251	1.22634	94.5868	5.7778	131.221	22.8674	399	328
29116	MYLIP	115.938	22.1231	1.22073	94.9748	6.62972	96.0582	2.98445	400	348
10714	POLD3	115.915	14.3128	1.27136	91.1735	8.79118	124.879	7.88851	401	245
7402	UTRN	115.87	10.7795	1.15633	100.205	7.74972	138.286	25.8031	402	581
55798	METTL2B	115.87	18.4097	1.16243	99.6788	16.1004	151.249	3.87545	403	556
254887	ZDHHC23	115.851	5.5526	1.15623	100.197	3.3871	93.0274	2.08954	404	582
10869	USP19	115.84	4.3511	1.16908	99.087	6.64321	100.393	12.1	405	532
254042	MAP1D	115.833	4.50779	1.1902	97.3226	1.54397	108.727	6.55552	406	458
162540	IMP5	115.832	8.89408	1.25195	92.521	9.3111	175.778	6.9307	407	277
374868	ATP9B	115.808	9.64242	1.06338	108.905	6.09505	92.8704	11.4406	408	1139
7223	TRPC4	115.756	11.7766	1.17963	98.1293	7.94498	113.674	16.5327	409	502
55703	POLR3B	115.752	11.669	1.13246	102.213	8.19291	112.178	30.4773	410	688
7084	TK2	115.703	2.14986	1.17612	98.3765	10.8221	89.4821	10.4056	411	514
57798	GATAD1	115.7	39.5728	1.12953	102.432	4.5947	99.519	16.9441	412	700
4644	MYO5A	115.661	7.2775	1.16961	98.8888	0.173922	112.807	6.16867	413	530
22824	HSPA4L	115.637	11.4937	1.2922	89.489	5.14022	75.4766	15.0913	414	215
535	ATP6V0A1	115.524	13.7721	1.30541	88.4958	12.0972	105.343	11.1348	415	191
143	PARP4	115.506	7.19523	1.22884	93.9957	3.9269	147.127	45.0694	416	319
9739	SETD1A	115.462	5.57312	1.4819	77.9149	3.85777	115.255	17.5512	417	69
27089	UQCRQ	115.457	11.08	1.20277	95.9929	6.45467	89.0763	23.3293	418	415
7296	TXNRD1	115.389	7.24534	1.17687	98.0474	4.74614	70.5296	5.47719	419	509
55624	POMGNT1	115.377	14.102	1.03147	111.857	6.14676	75.4643	14.2348	420	1411
83988	NCALD	115.344	20.846	1.33062	86.6843	3.73158	107.201	21.9828	421	161
25837	RAB26	115.29	9.84355	1.22115	94.4105	3.70014	88.1174	9.62855	422	345
81831	NETO2	115.257	6.65258	1.28866	89.4392	0.465355	118.618	7.42436	423	220
23244	PDS5A	115.132	33.0728	1.20857	95.2632	3.61169	128.174	14.6923	424	398
10514	MYBBP1A	115.123	9.37617	1.05578	109.041	3.65258	113.809	13.9101	425	1196
64849	SLC13A3	115.115	4.4624	1.18709	96.972	2.21514	96.3386	10.1448	426	476
51205	ACP6	115.014	7.08463	1.18343	97.1875	7.2794	104.044	4.28645	427	487
5717	PSMD11	114.981	7.16981	1.08615	105.861	2.86206	76.2424	10.6262	428	970
6538	SLC6A11	114.976	7.94026	1.09379	105.117	10.7422	107.879	17.5975	429	901
94122	SYTL5	114.962	15.2214	0.985552	116.647	7.65302	99.265	7.39453	430	1872
387496	RASL11A	114.919	8.994	1.08898	105.529	7.77035	102.474	19.3417	431	945
246175	CNOT6L	114.919	41.0186	1.29314	88.868	2.79906	95.3669	12.9521	432	211
56922	MCCC1	114.913	12.295	1.12954	101.734	3.89615	99.1444	17.6653	433	699
148867	SLC30A7	114.887	7.18568	1.04812	109.613	2.72457	103.167	14.2966	434	1259
11072	DUSP14	114.832	7.62216	1.12753	101.844	7.06361	153.421	44.6757	435	711
285755	PPIL6	114.701	1.31007	1.19175	96.2463	4.88569	163.067	24.4093	436	452
127933	UHMK1	114.7	17.3104	1.09539	104.711	7.84568	89.918	16.1229	437	894
4621	MYH3	114.684	6.44384	1.06117	108.074	8.57773	113.828	26.9583	438	1157
81488	GRINL1A	114.672	38.1587	1.08988	105.215	6.48284	107.726	28.2576	439	938
5032	P2RY11	114.666	2.79358	1.12985	101.487	8.01492	99.4341	10.4606	440	698
5052	PRDX1	114.655	6.33233	1.25703	91.2104	2.8223	87.3968	25.466	441	273
4593	MUSK	114.652	6.31185	1.10694	103.576	3.41845	117.684	15.1661	442	830
1018	CDK3	114.639	4.76712	1.10529	103.718	2.68961	110.724	17.2451	443	842
5602	MAPK10	114.625	46.7265	1.21815	94.0978	3.49338	89.8551	8.50097	444	363
11174	ADAMTS6	114.596	4.97022	1.12087	102.239	6.36148	82.8875	21.9092	445	752
2869	GRK5	114.591	12.5619	1.11419	102.847	2.09766	97.5401	6.85165	446	784
51127	TRIM17	114.583	5.48096	1.45032	79.0057	3.51284	167.511	34.6549	447	80
163	AP2B1	114.567	6.77007	1.2077	94.8641	4.49779	100.346	3.4007	448	401
3308	HSPA4	114.557	16.5303	1.05963	108.11	2.8495	90.6326	12.5087	449	1163
27339	PRPF19	114.555	5.90921	1.11629	102.621	8.23338	100.494	9.1163	450	772
3155	HMGCL	114.548	3.29749	1.131	101.28	10.0003	102.801	24.2928	451	694
84706	GPT2	114.525	27.2314	1.1658	98.2375	4.85502	150.841	23.6297	452	542
8834	TMEM11	114.524	4.12248	1.0918	104.895	1.57547	124.361	16.5288	453	923
11015	KDELR3	114.522	12.9122	1.55433	73.6792	23.1501	100.946	11.5261	454	46
23549	DNPEP	114.466	5.83855	1.08452	105.545	5.61401	121.347	12.4893	455	986
43849	KLK12	114.422	10.7004	1.09096	104.882	12.3745	88.6823	17.6291	456	930
7991	TUSC3	114.418	2.98969	1.48536	77.0304	41.1728	83.8917	78.9386	457	67
54545	MTMR12	114.398	5.45274	1.16478	98.2144	9.32831	118.579	16.3814	458	549
55605	KIF21A	114.397	13.8333	1.12115	102.036	3.995	80.4812	9.77345	459	749
5836	PYGL	114.384	2.21549	1.0897	104.969	4.91164	112.172	8.69102	460	940
23408	SIRT5	114.37	11.5971	1.05629	108.275	10.4983	99.3827	3.02641	461	1193
1786	DNMT1	114.293	9.33872	1.15335	99.0964	1.56624	81.4665	18.8454	462	597
3704	ITPA	114.273	19.7409	1.19971	95.2499	2.14364	74.9918	6.37231	463	428
9900	SV2A	114.264	41.0827	1.57446	72.5738	2.05081	133.107	26.7528	464	44
9590	AKAP12	114.252	14.1911	1.19129	95.9067	7.7667	129.396	19.9437	465	453
5609	MAP2K7	114.246	6.25637	1.14245	100.001	7.97688	97.8741	24.2828	466	648
7416	VDAC1	114.238	8.96566	1.09367	104.454	8.49899	87.3759	7.48925	467	902
140576	S100A16	114.231	9.78723	1.13301	100.821	2.15609	120.326	18.1258	468	685
644	BLVRA	114.224	5.56324	1.22107	93.5441	11.286	114.109	34.3486	469	346
5586	PKN2	114.221	4.14808	1.1065	103.227	5.93562	101.419	9.17929	470	834
6810	STX4	114.217	13.1074	1.18802	96.1409	8.30233	106.853	20.088	471	473
25924	MYRIP	114.198	8.53057	1.05559	108.184	2.75058	77.5973	13.2579	472	1197
64645	HIAT1	114.191	9.5268	1.16038	98.4088	8.84067	95.3196	13.7288	473	566
701	BUB1B	114.169	16.4965	1.12075	101.868	6.76378	57.6513	29.2322	474	753
5019	OXCT1	114.142	9.30587	1.08154	105.536	9.44777	97.6496	21.1105	475	1005
2787	GNG5	114.13	5.48942	1.16081	98.3194	5.85864	124.351	30.0306	476	563
84628	NTNG2	114.103	23.0184	1.26998	89.8465	4.70844	92.7117	9.45684	477	250
4218	RAB8A	114.095	16.6405	1.07232	106.401	5.29244	93.6683	2.92752	478	1075
993	CDC25A	114.083	5.45842	1.24822	91.3967	2.80326	99.95	18.1357	479	285
1654	DDX3X	114.072	17.6065	1.0893	104.721	7.40767	109.04	21.8057	480	944
3709	ITPR2	114.071	18.9236	1.14378	99.7313	9.88964	112.142	3.23882	481	639
10763	NES	114.058	10.4015	1.12606	101.289	6.68711	113.381	18.7439	482	721
1836	SLC26A2	114.051	7.23871	1.09265	104.379	1.60856	91.9357	6.30927	483	913
6787	NEK4	114.037	2.46973	1.17976	96.6619	10.1497	113.267	11.8558	484	501
3845	KRAS	114.008	16.1487	1.1384	100.148	4.18008	89.2567	7.79377	485	668
142679	DUSP19	113.984	3.66673	1.20093	94.913	8.58265	93.9478	20.8055	486	422
1329	COX5B	113.978	9.82737	1.09656	103.941	6.03115	80.343	4.83395	487	887
185	AGTR1	113.968	36.4388	1.16017	98.2336	6.58698	85.1432	11.5221	488	567
57551	TAOK1	113.937	7.61936	1.12684	101.111	2.82487	87.1716	16.6728	489	717
54529	ASNSD1	113.924	10.5798	1.05319	108.17	9.32684	123.924	25.8873	490	1217
6545	SLC7A4	113.893	17.6548	1.05783	107.667	6.27896	117.502	23.1051	491	1179
8218	CLTCL1	113.89	6.36331	1.08453	105.013	4.5523	87.7552	17.3576	492	985
3710	ITPR3	113.872	22.1254	1.0193	111.715	9.73388	85.587	6.48495	493	1534
11332	ACOT7	113.864	7.37312	1.2997	87.608	4.56607	92.8933	14.8509	494	197
7328	UBE2H	113.766	3.86103	1.0553	107.805	6.34482	113.299	4.18585	495	1198
51060	TXNDC12	113.71	20.7962	1.18935	95.6065	6.53955	94.0231	16.1919	496	461
9054	NFS1	113.691	5.26014	1.09224	104.089	6.45043	124.109	14.064	497	919
2327	FMO2	113.689	11.1162	1.23235	92.2538	11.5747	84.3343	12.8526	498	314
10307	APBB3	113.666	9.00597	1.19376	95.2167	4.76468	165.448	13.7538	499	444
386617	KCTD8	113.66	8.91428	1.02259	111.15	9.07615	123.825	18.4865	500	1510
8139	GAN	113.653	5.89516	1.07434	105.788	1.35634	96.6343	15.1997	501	1060
8905	AP1S2	113.638	4.32394	1.23276	92.1822	3.56326	116.193	6.70901	502	311
79094	CHAC1	113.63	47.9418	1.15797	98.1285	4.32749	109.487	14.4552	503	573
60559	SPCS3	113.626	6.23402	1.10323	102.994	7.27348	90.0967	26.1097	504	851
466	ATF1	113.544	5.75287	1.11035	102.26	7.48606	79.3097	11.5001	505	806
25885	POLR1A	113.535	5.3286	1.02973	110.257	5.25849	73.6874	7.05701	506	1430
8202	NCOA3	113.533	4.58786	1.08525	104.614	2.14535	147.606	18.2107	507	978
2583	B4GALNT1	113.524	12.4135	1.03897	109.266	5.9845	89.1033	10.87	508	1338
24146	CLDN15	113.5	2.16085	1.17988	96.1963	8.76986	182.433	47.3154	509	499
26953	RANBP6	113.498	11.6488	1.10259	102.937	4.78751	81.5411	21.3647	510	857
6199	RPS6KB2	113.439	12.705	1.10566	102.599	2.33454	104.861	8.10475	511	839
8778	SIGLEC5	113.426	3.02708	1.10963	102.22	7.85508	151.225	19.9378	512	812
4967	OGDH	113.402	6.0872	1.21813	93.0955	9.69455	67.648	11.1122	513	364
398	ARHGDIG	113.381	13.3255	1.06141	106.82	11.7367	113.002	9.00369	514	1155
29946	SERTAD3	113.366	6.66719	1.09674	103.366	5.03051	103.829	13.1121	515	886
2245	FGD1	113.336	6.89572	1.29414	87.5761	8.42371	136.308	47.7144	516	206
5687	PSMA6	113.303	7.71959	1.15606	98.0071	7.0202	88.285	8.09041	517	583
528	ATP6V1C1	113.281	19.3633	1.16466	97.2649	19.4511	98.7925	8.17766	518	551
5260	PHKG1	113.27	11.8377	1.07452	105.414	1.14101	97.5966	11.7051	519	1056
10585	POMT1	113.26	0.967046	1.38928	81.5242	18.3903	129.881	19.0736	520	112
8718	TNFRSF25	113.232	11.1519	1.21866	92.9152	1.74904	103.954	16.7284	521	360
7419	VDAC3	113.218	12.659	1.15785	97.7827	11.4068	126.345	23.5893	522	574
23547	LILRA4	113.211	9.93461	1.0857	104.275	4.04685	95.7893	5.50099	523	973
537	ATP6AP1	113.207	5.31706	1.31403	86.1526	4.97464	114.785	13.3406	524	186
341	APOC1	113.197	9.95247	1.1153	101.495	13.0074	108	17.3545	525	779
912	CD1D	113.16	8.70281	1.1314	100.018	14.7713	152.715	13.1957	526	693
9477	MED20	113.147	5.43765	1.18266	95.6715	1.31929	100.714	12.9138	527	491
23613	ZMYND8	113.139	10.8793	1.24146	91.1341	7.33833	94.1136	14.7897	528	293
54973	CPSF3L	113.069	3.31546	1.11936	101.013	3.21454	90.9655	4.35005	529	758
9312	KCNB2	113.041	5.68674	1.18941	95.0395	20.7178	100.901	32.3111	530	460
2946	GSTM2	113.023	3.25446	1.02177	110.616	12.8627	103.314	12.0038	531	1518
4313	MMP2	112.999	6.01397	1.06455	106.147	3.86342	123.351	22.8362	532	1130
5600	MAPK11	112.987	5.36463	1.13817	99.2706	7.96813	101.509	19.878	533	671
6464	SHC1	112.986	22.9912	1.09503	103.181	18.7705	226.01	33.3853	534	896
9240	PNMA1	112.955	13.3586	1.00416	112.487	5.33586	91.577	1.1939	535	1691
5529	PPP2R5E	112.9	5.57727	1.08296	104.252	1.72639	117.012	13.5338	536	999
54107	POLE3	112.811	8.59111	1.15084	98.0249	1.79101	155.122	7.49519	537	612
2983	GUCY1B3	112.806	5.75267	1.04377	108.075	6.66195	138.398	27.7327	538	1301
55611	OTUB1	112.73	3.55994	1.06805	105.547	12.7617	91.6345	22.9758	539	1104
27349	MCAT	112.673	5.11261	1.04165	108.168	2.18	115.446	20.2969	540	1317
1312	COMT	112.641	8.29002	1.08572	103.748	6.76896	77.6477	8.38968	541	972
9126	SMC3	112.638	9.79704	1.11213	101.281	3.89726	111.071	21.2483	542	795
7779	SLC30A1	112.636	5.64828	1.0397	108.335	10.8001	103.828	9.57412	543	1333
6386	SDCBP	112.626	10.16	1.03677	108.631	3.93982	120.246	34.2639	544	1360
4804	NGFR	112.617	10.0158	1.26912	88.7365	1.97346	102.696	28.5797	545	253
5243	ABCB1	112.617	5.23157	1.26342	89.1366	1.73597	112.18	11.1292	546	263
64172	OSGEPL1	112.593	29.3454	1.07853	104.395	8.764	104.235	11.2385	547	1031
203054	ADCK5	112.549	1.06298	0.96172	117.029	10.1107	77.633	9.59916	548	2146
1155	TBCB	112.523	5.54546	1.05089	107.074	5.03624	74.4543	20.194	549	1240
64231	MS4A6A	112.497	6.48575	1.07546	104.604	3.844	86.7051	3.24082	550	1049
57143	ADCK1	112.493	4.23112	1.23753	90.9011	6.34668	52.8746	35.5309	551	300
6494	SIPA1	112.443	1.81853	1.1153	100.818	6.84161	133.21	24.6964	552	778
4684	NCAM1	112.44	11.0319	1.1478	97.9612	1.68716	81.8304	3.37235	553	625
84879	MFSD2	112.439	7.96395	0.975302	115.286	10.0873	86.6779	12.4476	554	1972
3420	IDH3B	112.432	3.50915	1.13707	98.8787	2.80526	75.4542	3.71578	555	675
529	ATP6V1E1	112.368	11.3462	1.20531	93.2274	13.3315	77.5386	1.20932	556	408
56655	POLE4	112.276	15.5343	1.12127	100.133	1.65842	85.2837	10.0612	557	747
11014	KDELR2	112.272	21.7625	1.05471	106.448	3.40571	136.513	30.9643	558	1203
1650	DDOST	112.215	3.8564	1.15422	97.2217	4.70778	186.236	38.7464	559	595
10491	CRTAP	112.175	19.5263	1.1673	96.0977	8.91242	116.877	27.978	560	536
1622	DBI	112.173	5.8672	1.12184	99.9899	5.44852	102.505	2.75817	561	743
83698	CALN1	112.173	6.04039	1.22841	91.3153	11.1516	108.09	15.7577	562	321
53834	FGFRL1	112.169	7.76725	1.14339	98.102	9.33854	104.856	8.02625	563	642
3777	KCNK3	112.15	11.9368	1.12882	99.3516	3.98892	115.095	18.097	564	707
4931	NVL	112.147	2.24501	1.14423	98.0111	3.94008	97.6238	16.7874	565	636
9375	TM9SF2	112.128	39.9275	1.07134	104.661	4.14977	99.2445	17.4436	566	1088
26577	PCOLCE2	112.061	6.54378	1.14041	98.2637	3.60531	91.8625	27.1978	567	657
4642	MYO1D	112.06	13.0494	1.10656	101.269	2.27194	128.128	22.6714	568	833
2060	EPS15	112.036	3.18336	0.904942	123.804	5.25958	89.7836	17.6555	569	2906
2978	GUCA1A	112.034	12.4112	1.12777	99.3403	8.60906	79.5571	16.0736	570	710
84280	BTBD10	112.003	2.1304	1.07777	103.922	5.1831	131.388	22.277	571	1036
7846	TUBA1A	111.999	8.58022	1.21379	92.2725	2.53122	140.929	43.5655	572	383
5024	P2RX3	111.996	22.4376	1.03425	108.287	1.79069	89.2683	2.93568	573	1386
23092	ARHGAP26	111.995	2.36703	1.02164	109.623	2.76555	87.9545	13.5156	574	1521
11011	TLK2	111.973	5.55482	1.10922	100.947	6.9508	107.071	27.2415	575	815
200316	APOBEC3F	111.95	18.2005	1.05142	106.475	4.08708	97.4749	15.3401	576	1232
1374	CPT1A	111.949	11.4316	1.15593	96.8474	11.4845	108.167	21.9395	577	584
5360	PLTP	111.948	18.9658	1.10219	101.568	5.83068	106.977	21.6932	578	859
57695	USP37	111.938	6.71851	1.04552	107.064	14.6948	84.6826	5.03844	579	1288
125206	SLC5A10	111.911	9.60899	1.05014	106.567	5.9599	79.3392	15.6909	580	1246
645	BLVRB	111.849	4.58821	1.09143	102.48	1.91095	114.084	21.6322	581	926
843	CASP10	111.848	2.62569	1.11096	100.677	4.95336	101.029	7.96907	582	805
57649	PHF12	111.812	9.76997	1.17083	95.4974	4.37426	102.182	3.94444	583	523
23596	OPN3	111.798	0.765487	1.10649	101.039	4.51631	96.1324	21.4915	584	835
55203	LGI2	111.798	5.18082	1.09277	102.307	10.563	132.839	20.4949	585	910
64431	ACTR6	111.776	15.2144	1.21006	92.3727	2.53244	165.655	14.3743	586	393
116988	AGAP3	111.771	3.70591	1.0923	102.326	2.80567	97.5872	17.3285	587	917
287	ANK2	111.718	13.481	1.12264	99.5137	3.45599	144.86	15.7179	588	739
112574	SNX18	111.704	11.099	1.0933	102.171	4.69054	108.574	7.85378	589	907
410	ARSA	111.601	4.60178	1.12242	99.4296	10.3435	91.8967	9.7255	590	741
1594	CYP27B1	111.592	25.6155	1.0712	104.175	3.70001	99.4747	3.88931	591	1089
977	CD151	111.587	8.04301	1.09912	101.524	2.09044	128.984	23.926	592	875
5654	HTRA1	111.587	3.59827	1.11827	99.7856	1.2134	100.789	31.8899	593	767
133	ADM	111.573	16.1539	1.11858	99.7453	4.49096	122.492	33.041	594	766
10101	NUBP2	111.563	3.3635	1.15164	96.8732	9.17615	115.767	18.6345	595	609
1363	CPE	111.561	6.21307	1.1195	99.6523	5.41979	111.858	12.4568	596	757
283349	RASSF3	111.533	6.27012	1.21971	91.4423	0.339813	137.788	22.876	597	351
2150	F2RL1	111.487	13.5807	1.23879	89.9972	5.71806	160.148	30.2605	598	297
3688	ITGB1	111.478	7.89015	1.50788	73.9308	10.6827	168.188	21.834	599	56
2064	ERBB2	111.468	4.52999	1.20008	92.8833	2.73598	114.735	23.3155	600	425
3749	KCNC4	111.439	3.10912	1.09445	101.822	4.27376	118.974	4.92422	601	898
2874	GPS2	111.435	7.23823	1.2487	89.2409	16.9484	132.757	38.9413	602	283
84148	MYST1	111.416	4.02447	1.08305	102.873	1.79221	93.426	10.9033	603	998
1211	CLTA	111.401	17.0764	1.09083	102.126	7.46669	118.73	36.0257	604	931
2026	ENO2	111.395	3.68331	1.07619	103.509	9.04609	128.748	4.72175	605	1043
5691	PSMB3	111.304	10.5137	1.11255	100.043	5.38007	128.09	22.9384	606	793
5728	PTEN	111.257	5.36834	1.087	102.352	2.82758	100.886	17.0715	607	961
115827	RAB3C	111.238	7.04822	1.05476	105.463	2.46235	109.239	12.9182	608	1202
9654	TTLL4	111.216	6.94387	1.12298	99.0362	2.58127	124.666	20.5281	609	735
55823	VPS11	111.214	4.35107	1.11926	99.3641	22.2962	153.017	60.3213	610	760
57619	SHROOM3	111.198	5.80589	1.21542	91.4891	2.76579	86.8545	15.855	611	375
29110	TBK1	111.183	13.934	1.14208	97.3508	2.4264	107.145	14.7683	612	650
138639	PTPDC1	111.159	4.98339	1.16157	95.6975	1.3725	85.6111	2.63786	613	559
51310	SLC22A17	111.156	2.60661	1.29366	85.9233	11.3581	116.331	4.16239	614	208
83746	L3MBTL2	111.142	11.3379	1.38531	80.2292	5.09329	157.438	21.0715	615	114
23404	EXOSC2	111.135	6.52274	0.995321	111.658	3.73944	78.2418	10.5627	616	1781
4976	OPA1	111.108	6.16269	1.17949	94.1996	3.42254	104.441	16.6478	617	504
9874	TLK1	111.089	1.93335	1.08849	102.058	8.81766	105.264	13.8936	618	948
1743	DLST	111.07	8.24614	1.06271	104.516	3.73637	111.046	13.0064	619	1146
10294	DNAJA2	111.042	7.21338	1.11341	99.7322	9.43652	166.991	18.276	620	788
1804	DPP6	111.033	6.71884	1.02071	108.78	7.47942	97.1293	11.706	621	1528
83931	STK40	111.03	17.151	1.0236	108.471	4.73982	83.4038	13.6231	622	1491
115019	SLC26A9	110.994	14.4146	1.11002	99.9923	10.0482	159.208	33.7012	623	810
5575	PRKAR1B	110.964	6.4322	1.00345	110.582	4.87403	100.086	16.7002	624	1702
3930	LBR	110.931	4.66341	1.05947	104.705	8.62653	144.879	46.6198	625	1165
10159	ATP6AP2	110.886	9.23878	1.16079	95.5261	1.67156	91.9905	21.9164	626	564
5933	RBL1	110.885	1.77738	1.16014	95.5792	0.59707	124.337	16.5525	627	568
283576	ZDHHC22	110.859	6.41575	1.26802	87.4265	3.72105	99.4227	14.1872	628	257
7074	TIAM1	110.854	14.0772	1.04845	105.731	19.1691	131.325	15.0751	629	1257
3786	KCNQ3	110.849	12.9154	1.04003	106.582	11.289	77.6184	16.0347	630	1331
10135	NAMPT	110.848	12.2493	1.20166	92.2453	2.30209	118.264	16.7421	631	419
1951	CELSR3	110.848	22.185	1.08737	101.941	2.1064	102.741	26.9499	632	956
292	SLC25A5	110.773	13.4607	1.0782	102.739	12.2005	171.717	29.9785	633	1032
9104	RGN	110.772	4.28931	1.09832	100.856	7.49774	139.91	61.7888	634	880
54555	DDX49	110.772	39.9837	1.07313	103.223	7.12179	116.621	23.6921	635	1068
55308	DDX19A	110.771	5.33918	1.10577	100.176	2.62553	102.118	0.495055	636	837
23324	MAN2B2	110.761	8.54746	1.23061	90.0044	7.95145	174.151	19.1118	637	316
51765	RP6-213H19.1	110.755	1.73305	1.08772	101.823	4.42649	121.17	11.0886	638	954
3603	IL16	110.753	12.7081	1.19612	92.5941	2.08607	96.0262	32.7352	639	442
4172	MCM3	110.749	2.11703	1.13875	97.2541	5.89134	77.3316	12.5186	640	667
10003	NAALAD2	110.734	4.84693	1.11273	99.5153	2.85726	87.0804	11.5807	641	790
54884	RETSAT	110.714	1.09298	1.12011	98.8418	4.0646	97.7662	12.4457	642	756
8879	SGPL1	110.577	2.36816	1.23846	89.2866	8.89078	92.2075	3.11656	643	299
9265	CYTH3	110.576	38.2704	1.02275	108.117	4.1701	92.9967	13.3279	644	1507
9700	ESPL1	110.568	7.92488						645	9000
10382	TUBB4	110.556	18.0515	1.11105	99.5062	1.75071	90.3113	5.64381	646	802
163778	SPRR4	110.501	11.0953	1.10942	99.6029	6.32048	87.6266	17.9277	647	814
353376	TICAM2	110.501	5.89492	1.13839	97.0671	6.47766	131.366	19.2834	648	669
25840	METTL7A	110.481	3.70295	1.06968	103.284	3.4506	90.3579	14.4806	649	1096
8607	RUVBL1	110.477	6.02927	1.05297	104.919	3.64795	82.6687	25.3653	650	1219
11198	SUPT16H	110.441	9.24538	1.02625	107.616	8.59638	115.337	4.85702	651	1464
481	ATP1B1	110.431	2.92312	1.04194	105.985	3.81906	90.8464	5.86717	652	1316
4919	ROR1	110.423	6.05174	1.02358	107.879	10.9221	73.5425	37.2678	653	1493
7803	PTP4A1	110.41	14.2531	1.09302	101.014	2.90483	82.6344	4.70467	654	909
201176	ARHGAP27	110.406	8.18043	1.16125	95.0752	6.26206	134.324	21.1659	655	560
5037	PEBP1	110.361	6.19989	1.08936	101.308	10.9988	140.79	4.46944	656	943
55249	YY1AP1	110.36	9.39934	1.29832	85.0019	14.5669	115.319	22.9162	657	200
5833	PCYT2	110.347	5.36165	1.00879	109.385	2.24514	95.2865	2.84843	658	1634
91608	RASL10B	110.316	12.1942	1.07409	102.706	6.65184	87.2881	17.5148	659	1062
51706	CYB5R1	110.301	11.9773	1.07386	102.715	4.27287	110.186	11.2452	660	1064
54814	QPCTL	110.295	6.55248	1.03933	106.122	4.44352	113.187	26.9972	661	1336
9326	ZNHIT3	110.292	3.94874	1.10894	99.4573	8.0049	196.169	46.101	662	817
25902	MTHFD1L	110.288	1.33105	1.06921	103.149	6.08407	85.5226	19.977	663	1097
8877	SPHK1	110.239	6.41346	1.23447	89.3005	9.37982	156.182	18.1257	664	308
4952	OCRL	110.205	2.13854	1.06321	103.653	7.73916	126.396	13.8039	665	1141
60509	AGBL5	110.186	7.88012	1.11549	98.7786	5.36039	103.679	16.1401	666	776
7257	TSNAX	110.178	14.2557	1.09913	100.241	1.57875	88.9461	23.5869	667	873
11164	NUDT5	110.176	6.85731	1.15094	95.727	3.00137	142.701	17.6338	668	611
79716	NPEPL1	110.164	5.06265	1.21885	90.3841	17.6001	99.9729	8.01503	669	357
8739	HRK	110.154	8.39423	1.08313	101.7	4.71712	113.628	14.4542	670	996
63908	NAPB	110.151	2.65287	1.41531	77.8282	7.18865	221.556	85.4997	671	96
8693	GALNT4	110.146	7.41912	1.1923	92.381	3.55546	155.037	24.0745	672	451
396	ARHGDIA	110.122	4.69392	1.04062	105.824	8.44696	89.9932	5.21368	673	1323
79154	MGC4172	110.086	4.8807	1.13052	97.3767	3.9767	80.7598	19.1127	674	696
10426	TUBGCP3	110.064	2.51692	1.12126	98.1613	2.31892	106.656	4.23909	675	748
5362	PLXNA2	110.064	16.8861	1.11269	98.9176	3.00535	96.3493	18.3641	676	791
55191	NADSYN1	110.058	4.36334	1.09562	100.454	15.2166	99.7682	15.0009	677	891
10293	TRAIP	110.055	5.02313	1.23978	88.77	12.6378	119.98	25.654	678	295
3418	IDH2	110.039	8.70679	1.00373	109.63	3.22698	135.491	14.6048	679	1698
7442	TRPV1	109.994	5.57867	1.00996	108.909	6.3072	109.938	44.117	680	1618
7178	TPT1	109.992	5.80123	1.04974	104.78	5.76403	102.694	23.7472	681	1249
7086	TKT	109.952	13.1105	1.03145	106.599	7.55219	85.5929	17.8883	682	1413
7414	VCL	109.949	17.413	1.22408	89.8214	6.33258	98.8322	9.25055	683	340
10892	MALT1	109.941	7.48676	1.25938	87.2984	9.19841	92.2569	11.1286	684	270
5631	PRPS1	109.915	15.601	1.21435	90.514	2.95149	82.5338	20.7325	685	379
6573	SLC19A1	109.901	11.5796	0.974834	112.738	7.39415	106.638	14.2605	686	1980
4194	MDM4	109.892	2.68212	1.18503	92.7339	0.584356	99.891	21.149	687	483
5734	PTGER4	109.871	16.2579	0.971425	113.103	5.51299	122.395	12.5548	688	2021
5265	SERPINA1	109.85	7.7589	1.06123	103.513	5.01339	123.418	30.4395	689	1156
2023	ENO1	109.847	1.93565	0.976088	112.538	7.04806	107.969	28.2448	690	1962
8326	FZD9	109.812	1.65738	0.982385	111.781	6.03406	108.725	17.999	691	1901
5521	PPP2R2B	109.809	0.877528	1.10037	99.7926	4.40078	118.116	6.53959	692	868
23216	TBC1D1	109.809	3.96021	1.19337	92.0157	3.66283	120.415	38.7716	693	448
57111	RAB25	109.798	5.31618	1.07868	101.79	0.889327	124.858	6.91084	694	1030
10202	DHRS2	109.77	3.12088	1.11592	98.3675	6.14884	129.226	29.1045	695	774
38	ACAT1	109.767	8.80679	1.10682	99.173	1.33053	124.655	20.6269	696	831
6575	SLC20A2	109.741	7.66821	1.01805	107.795	7.59397	110.154	16.4164	697	1546
220963	SLC16A9	109.702	7.46692	1.15926	94.6313	2.61288	114.088	2.70753	698	570
538	ATP7A	109.688	7.52492	1.06267	103.219	6.91668	123.901	5.40773	699	1147
52	ACP1	109.63	2.623	1.06264	103.168	10.9048	79.4037	2.39361	700	1148
26050	SLITRK5	109.627	33.5212	0.962585	113.888	3.49239	113.106	17.9255	701	2129
92235	DUSP27	109.589	9.07248	1.11259	98.4983	7.8361	163.545	61.4865	702	792
1241	LTB4R	109.576	3.88576	1.10373	99.2774	6.45203	98.7904	25.2584	703	848
204801	NLRP11	109.553	14.1321	1.04977	104.359	3.03698	80.7434	7.5787	704	1248
6508	SLC4A3	109.552	37.1543	1.04888	104.447	3.1133	160.658	18.8242	705	1256
9435	CHST2	109.536	4.38156	1.03516	105.816	3.32991	98.7206	15.3202	706	1376
6655	SOS2	109.532	10.8296	0.929555	117.833	4.10828	94.0408	23.6521	707	2567
2175	FANCA	109.527	23.9363	1.04755	104.555	11.4995	116.352	10.6401	708	1267
3363	HTR7	109.477	9.01376	1.15494	94.7897	7.80808	88.9216	12.8943	709	592
5743	PTGS2	109.439	2.80937	1.02413	106.86	5.45419	151.184	37.913	710	1485
64084	CLSTN2	109.379	10.4359	1.07775	101.488	4.83001	101.35	6.45653	711	1037
3326	HSP90AB1	109.368	40.7463	1.1903	91.8832	11.7593	106.754	12.3667	712	456
10298	PAK4	109.349	28.9272	1.107	98.7798	3.1352	111.737	13.401	713	829
4704	NDUFA9	109.336	5.88416	1.07437	101.767	4.31778	117.694	27.3775	714	1058
3780	KCNN1	109.335	5.88887	1.03065	106.083	5.53569	114.105	13.6637	715	1418
5872	RAB13	109.307	7.45695	1.07069	102.091	3.01995	124	25.7137	716	1093
341640	FREM2	109.305	9.79143	1.17034	93.3957	1.8723	146.345	18.3611	717	524
65012	SLC26A10	109.29	14.799	0.909456	120.17	17.036	131.231	35.9484	718	2834
389015	SLC9A4	109.288	9.64906	0.998344	109.47	4.1633	82.164	16.8575	719	1749
2914	GRM4	109.224	17.2652	0.963752	113.332	13.5526	103.134	18.4729	720	2115
919	CD247	109.15	7.04623	1.1067	98.6263	7.5758	126.486	29.6984	721	832
6311	ATXN2	109.119	9.00261	1.14565	95.2469	11.8225	105.068	15.6981	722	632
23400	ATP13A2	109.114	5.34313	1.08446	100.616	4.89715	128.291	20.681	723	987
151	ADRA2B	109.113	14.3002	1.23258	88.524	16.2699	107.478	20.7239	724	313
23523	CABIN1	109.082	23.8746	1.12158	97.2578	4.94582	136.01	37.0259	725	746
8036	SHOC2	109.081	10.1341	1.02423	106.5	4.87909	117.43	34.7412	726	1483
5520	PPP2R2A	109.079	22.1319	1.08018	100.982	0.872941	89.4173	8.30684	727	1014
60625	DHX35	109.056	4.30183	1.07579	101.373	3.85571	89.7085	11.1613	728	1047
10273	STUB1	108.986	3.70225	1.08011	100.903	5.3716	106.351	10.565	729	1015
10868	USP20	108.944	15.0134	1.12365	96.9551	5.38777	102.716	20.7147	730	730
4645	MYO5B	108.937	10.2954	1.04372	104.374	4.37239	80.579	8.85567	731	1302
80270	HSD3B7	108.896	7.92288						732	9000
8317	CDC7	108.895	6.95576	1.15713	94.1082	3.93719	87.3323	15.9952	733	578
10396	ATP8A1	108.89	13.0563	1.06898	101.863	4.09805	121.901	13.9616	734	1099
23221	RHOBTB2	108.837	7.7678	1.1318	96.1628	2.04794	77.7221	11.2999	735	692
51102	MECR	108.825	15.313	1.2699	85.6955	3.00926	101.21	10.2626	736	251
9213	XPR1	108.823	11.6394	1.10552	98.4368	9.3663	100.017	31.0949	737	840
3265	HRAS	108.797	18.8962	1.09477	99.3786	9.89404	113.368	16.5443	738	897
8506	CNTNAP1	108.785	5.95545	1.03858	104.744	6.76474	101.578	24.3622	739	1341
8747	ADAM21	108.778	9.89128	1.05209	103.392	2.20566	157.089	40.536	740	1225
6770	STAR	108.767	2.04253	1.15743	93.9729	2.69627	93.6424	10.6142	741	576
158158	RASEF	108.759	11.3999	1.09838	99.0174	4.11184	114.931	35.2213	742	879
5128	PCTK2	108.751	3.09292	1.07373	101.283	1.93604	141.479	5.29507	743	1067
8394	PIP5K1A	108.751	4.45956	1.06709	101.913	8.55986	95.7931	8.26696	744	1111
10536	LEPREL2	108.74	18.9665	1.3043	83.3705	4.34474	215.219	65.699	745	194
9465	AKAP7	108.727	5.2688	1.15386	94.2286	8.5868	102.17	15.2897	746	596
23095	KIF1B	108.725	10.3244	1.07159	101.462	2.52022	95.0292	7.88499	747	1084
10857	PGRMC1	108.719	5.96716	1.11217	97.754	11.5859	93.9434	28.1155	748	794
64714	PDIA2	108.715	10.2728	1.02992	105.556	5.61402	91.6749	13.2438	749	1426
23341	DNAJC16	108.693	5.48334	1.01779	106.793	5.2548	97.715	2.26589	750	1549
7321	UBE2D1	108.686	9.70857	1.12347	96.7413	11.1315	83.0019	9.89996	751	732
219743	TYSND1	108.685	8.86648	0.955129	113.791	6.87979	138.431	23.4126	752	2246
114805	GALNT13	108.683	3.37836	1.07618	100.99	4.84257	95.3629	12.5792	753	1044
90952	ESAM	108.66	3.55085	1.19858	90.6571	1.98808	109.546	8.3878	754	431
11214	AKAP13	108.649	10.2327	1.14112	95.2131	13.2897	77.5575	21.0914	755	654
80724	ACAD10	108.648	1.44712	1.40723	77.207	18.7429	116.111	29.5925	756	103
30819	KCNIP2	108.638	5.11093	1.11409	97.5126	6.30964	84.2903	14.1218	757	786
87	ACTN1	108.624	7.67479	1.02864	105.599	8.6461	122.435	24.5678	758	1444
4707	NDUFB1	108.564	6.52446	1.14888	94.4957	1.87425	154.491	10.1095	759	622
6567	SLC16A2	108.5	10.7051	1.13819	95.3264	4.80421	85.6363	14.9131	760	670
54938	SARS2	108.49	5.56047	1.17427	92.3894	10.2689	96.8937	36.371	761	518
5627	PROS1	108.485	9.84154	1.01801	106.566	2.07605	112.848	24.8471	762	1547
353189	SLCO4C1	108.478	8.15372	0.923255	117.495	15.7191	106.05	14.8223	763	2653
55081	IFT57	108.451	7.09226	1.18751	91.3265	3.80324	142.947	64.7183	764	474
2774	GNAL	108.445	0.912194	1.03392	104.887	10.8894	114.712	16.4743	765	1390
1213	CLTC	108.439	8.00193	1.15584	93.8183	8.3718	113.481	19.3303	766	585
51162	EGFL7	108.388	7.90743	1.05706	102.537	3.96727	90.1102	27.5449	767	1189
11261	CHP	108.383	5.40795	0.996732	108.739	8.61926	126.46	41.2145	768	1762
595	CCND1	108.382	1.04909	1.0524	102.986	7.12555	100.276	5.61068	769	1222
11146	GLMN	108.381	6.90519	1.0594	102.304	7.85046	144.891	41.8548	770	1167
8934	RAB7L1	108.347	32.7953	1.10763	97.819	5.03917	103.756	18.6294	771	826
4719	NDUFS1	108.345	12.5169	1.07937	100.378	4.2886	104.629	17.6392	772	1020
5781	PTPN11	108.341	11.339	1.19705	90.5066	9.76585	75.3608	11.4976	773	438
1675	CFD	108.337	8.03808	1.05886	102.315	5.12288	93.7679	8.66651	774	1172
5160	PDHA1	108.327	8.0682	1.00641	107.637	12.8881	106.38	13.0359	775	1657
5707	PSMD1	108.326	7.05862	1.07464	100.803	1.44212	136.106	36.0936	776	1054
929	CD14	108.3	8.51218	1.058	102.363	5.44236	89.521	22.0031	777	1177
121260	SLC15A4	108.289	4.18232	1.06753	101.439	7.55602	83.1033	12.1521	778	1107
6780	STAU1	108.288	10.9974	1.08564	99.7453	1.0086	126.903	10.2785	779	974
7422	VEGFA	108.269	8.41842	1.13394	95.4802	1.39476	65.144	9.27983	780	684
6363	CCL19	108.264	9.42732	0.997829	108.499	2.59248	108.632	5.28768	781	1750
3421	IDH3G	108.263	13.9619	1.03269	104.836	7.79695	104.25	7.24165	782	1401
51004	COQ6	108.262	35.9496	1.18172	91.6134	2.56441	172.051	16.5727	783	492
1081	CGA	108.252	7.36588	1.03058	105.04	7.9442	130.408	28.4765	784	1420
7784	ZP3	108.251	6.98101	1.1003	98.3837	9.96842	99.0453	5.63725	785	869
284161	GDPD1	108.223	6.19128	1.15733	93.5114	4.29931	104.489	12.3163	786	577
6534	SLC6A7	108.189	12.5006	1.0293	105.11	12.6962	126.041	21.0401	787	1435
4935	GPR143	108.176	1.50462	1.02106	105.944	1.95353	103.547	23.6202	788	1525
79027	ZNF655	108.086	4.66434	1.23443	87.5593	2.50349	127.546	26.8398	789	309
9088	PKMYT1	108.078	5.64567	1.04896	103.033	4.20574	83.4733	18.529	790	1254
79654	HECTD3	108.066	11.6998	1.07437	100.586	17.0445	117.026	21.1072	791	1059
3742	KCNA6	108.047	1.8825	1.04577	103.318	5.94639	117.557	40.5514	792	1285
9943	OXSR1	108.046	6.80884	1.15264	93.738	6.41658	116.45	11.3332	793	603
10411	RAPGEF3	108.031	2.84373	1.00006	108.025	4.25233	91.6977	6.03149	794	1731
6296	ACSM3	108.03	4.19717	1.12106	96.3641	5.97492	147.307	24.4559	795	750
85320	ABCC11	108.022	9.38765	1.08312	99.7318	8.71425	80.7574	6.14005	796	997
9132	KCNQ4	108.02	6.37533	0.966325	111.785	3.33314	126.038	13.3357	797	2082
8178	ELL	108.018	6.27357	1.16043	93.0843	6.02451	99.0385	14.8026	798	565
8444	DYRK3	107.979	14.1321	1.02429	105.418	3.00109	106.259	8.37822	799	1482
5136	PDE1A	107.96	8.18395	1.14373	94.393	6.41754	71.2493	9.58076	800	640
6676	SPAG4	107.951	14.5182	1.12281	96.1436	4.27918	116.581	6.24079	801	737
26168	SENP3	107.951	4.47213	1.01679	106.168	8.20267	88.1565	12.2631	802	1562
10575	CCT4	107.931	24.8352	1.18548	91.0437	3.02439	142.138	42.2593	803	482
58488	PCTP	107.928	5.26092	1.1668	92.4994	7.78841	106.83	9.42341	804	538
51129	ANGPTL4	107.905	32.4844	1.23679	87.2458	5.8271	102.805	21.3934	805	304
23304	UBR2	107.892	7.5459	1.09926	98.1497	5.54484	108.901	24.5219	806	871
55890	GPRC5C	107.887	6.53469	1.01536	106.255	2.21268	107.595	2.05358	807	1567
4968	OGG1	107.884	15.3925	1.12901	95.5566	7.12707	113.794	32.7105	808	704
112858	TP53RK	107.858	4.56882	1.00543	107.276	5.12646	117.079	8.21304	809	1670
145482	PTGR2	107.855	3.83686	0.988771	109.079	8.40823	105.525	4.7829	810	1842
6505	SLC1A1	107.844	2.38571	1.00003	107.84	6.49311	100.722	28.1047	811	1732
5049	PAFAH1B2	107.839	3.92533	1.09068	98.8739	9.70219	127.751	17.8376	812	934
10406	WFDC2	107.826	5.24067	1.10961	97.1749	4.62771	100.994	9.39021	813	813
3098	HK1	107.819	5.43772	1.06282	101.446	3.00272	104.116	9.34261	814	1144
1005	CDH7	107.814	12.7042	1.1893	90.6535	3.55583	107.037	22.3437	815	463
55366	LGR4	107.809	4.27185	1.02923	104.747	1.7176	117.619	17.4693	816	1436
9475	ROCK2	107.802	5.30304	1.08776	99.1048	5.66108	96.3102	16.1977	817	952
374354	NHLRC2	107.797	4.78202	1.02952	104.706	13.8521	75.3088	13.4668	818	1434
151313	FAHD2B	107.77	3.89098	1.1116	96.9498	3.63925	120.639	21.7312	819	797
23028	AOF2	107.767	7.61218	1.32174	81.5343	1.54864	101.759	36.8549	820	175
7879	RAB7A	107.752	8.95257	1.11101	96.9854	2.43197	136.068	8.29895	821	803
2288	FKBP4	107.724	8.60112	1.15234	93.4834	7.70137	140.884	68.8263	822	606
23336	SYNM	107.702	3.14122	1.09267	98.5674	2.82403	121.67	8.77404	823	912
51741	WWOX	107.7	10.4504	1.23691	87.0719	4.76571	135.012	25.3088	824	303
11177	BAZ1A	107.693	6.33582	0.995435	108.187	0.614704	101.699	18.6026	825	1778
762	CA4	107.65	6.32216	1.15041	93.5756	12.9215	120.736	22.6405	826	616
5201	PFDN1	107.645	9.91492	1.08985	98.7706	1.68543	137.135	43.7752	827	939
2346	FOLH1	107.642	0.234738	1.03578	103.924	10.1997	134.228	7.14114	828	1368
11320	MGAT4A	107.632	9.84781	1.17676	91.4644	4.50669	105.106	22.7758	829	510
30845	EHD3	107.622	8.6199	1.10837	97.0997	0.432077	99.8059	8.09433	830	820
5002	SLC22A18	107.585	3.72597	1.063	101.208	8.01341	97.4797	8.94251	831	1143
3416	IDE	107.559	2.6585	1.06625	100.876	8.41685	93.1874	16.5539	832	1121
5096	PCCB	107.552	10.8589	1.16425	92.3783	10.2832	111.47	16.7462	833	553
117854	TRIM6	107.551	3.94972	1.07952	99.6286	3.79408	130.794	11.8876	834	1018
84640	USP38	107.55	9.60914	1.29031	83.3521	10.1323	29.1073	24.1232	835	218
4598	MVK	107.542	4.09124	1.02879	104.532	2.63245	110.773	11.0708	836	1442
7052	TGM2	107.521	7.1349	1.10266	97.511	8.35034	118.273	26.1819	837	856
23370	ARHGEF18	107.488	3.22534	1.04544	102.817	2.41862	88.6399	10.7728	838	1289
2590	GALNT2	107.483	11.8578	1.04572	102.784	12.3611	78.8409	26.0844	839	1286
2081	ERN1	107.483	8.28591	0.970163	110.789	1.13311	95.1953	4.05517	840	2042
9619	ABCG1	107.479	2.07	1.07934	99.5786	8.61145	113.207	6.5729	841	1021
151473	SLC16A14	107.46	4.90894	1.12585	95.4473	4.39733	106.871	37.6631	842	722
23062	GGA2	107.453	8.17799	1.15425	93.0938	4.24783	111.97	5.43004	843	594
27294	DHDH	107.439	5.06249	1.14322	93.9791	3.56069	100.706	16.3146	844	643
699	BUB1	107.429	15.4279	1.22351	87.804	1.17505	225.055	18.0884	845	342
84572	GNPTG	107.402	5.10119	1.04989	102.298	4.16789	100.967	0.975476	846	1247
64090	GAL3ST2	107.402	5.13457	0.999334	107.474	4.81855	88.7887	14.3209	847	1738
5959	RDH5	107.399	2.33889	1.03988	103.28	3.7817	131.406	16.8187	848	1332
1353	COX11	107.385	17.0398	1.02911	104.348	5.71266	98.3622	8.93868	849	1438
4913	NTHL1	107.361	7.72376	1.2126	88.538	3.73879	111.124	31.9407	850	386
1635	DCTD	107.347	11.3585	0.965754	111.154	6.47611	78.0293	16.0713	851	2091
6050	RNH1	107.337	1.59354	1.01299	105.96	13.3563	117.552	17.9971	852	1588
7975	MAFK	107.335	19.7412	1.08834	98.6228	8.27548	88.9987	6.48383	853	950
9091	PIGQ	107.331	11.7725	1.20071	89.3897	12.2733	123.538	20.699	854	424
1351	COX8A	107.327	3.88741	1.05066	102.152	7.79266	70.3025	20.726	855	1243
3932	LCK	107.319	6.06756	1.11552	96.2059	8.20094	97.6532	13.0912	856	775
526	ATP6V1B2	107.312	3.80401	1.05392	101.822	6.39391	122.414	19.0156	857	1210
9410	WDR57	107.303	6.62483	1.18489	90.5599	4.11158	154.681	11.8467	858	485
444	ASPH	107.289	2.69627	1.02131	105.05	3.61227	88.5342	17.4785	859	1522
84552	PARD6G	107.275	10.5563	1.00901	106.317	6.85225	117.56	24.1996	860	1631
9039	UBA3	107.261	8.43219	1.20092	89.3162	4.7219	121.827	31.1414	861	423
9415	FADS2	107.243	5.30884	0.939155	114.191	5.6947	86.5117	21.6926	862	2445
348932	SLC6A18	107.231	7.92086	1.16444	92.0879	3.74615	108.328	15.8762	863	552
5771	PTPN2	107.216	5.71195	1.07265	99.9544	4.52524	107.117	24.8471	864	1071
55619	DOCK10	107.211	4.71218	1.01007	106.143	14.2692	82.5225	24.0949	865	1616
170384	FUT11	107.21	16.8562	0.993795	107.88	15.3089	105.991	27.3917	866	1798
539	ATP5O	107.207	4.93042	1.15907	92.494	4.66758	75.8561	5.68845	867	571
431705	ASTL	107.204	3.79967	1.0642	100.737	5.41485	102.23	7.42553	868	1133
5352	PLOD2	107.202	3.56026	1.02267	104.825	4.05103	106.679	26.8046	869	1509
23542	MAPK8IP2	107.197	7.6224	1.06683	100.482	5.64788	102.074	11.6331	870	1116
55832	CAND1	107.195	4.93144	1.06278	100.863	5.72594	187.897	27.5551	871	1145
53944	CSNK1G1	107.182	0.394168	0.982892	109.047	1.98484	102.737	21.5891	872	1895
23761	PISD	107.154	0.278459	1.18868	90.146	4.69066	87.919	4.51274	873	470
11215	AKAP11	107.154	8.14289	1.03637	103.393	1.53882	128	6.30053	874	1363
83891	SNX25	107.15	9.4391	0.988312	108.418	2.22121	115.903	12.0271	875	1847
2140	EYA3	107.076	29.1402	1.22569	87.3596	6.35196	108.938	17.1889	876	334
64324	NSD1	107.074	4.54531	1.11903	95.6838	2.83975	110.541	23.4252	877	762
59283	CACNG8	107.038	11.6433	1.14904	93.1541	7.09995	142.62	20.214	878	620
9924	PAN2	107.03	4.72802	1.10189	97.1331	3.33736	113.565	2.13558	879	861
64061	TSPYL2	107.029	13.6014	1.06672	100.335	7.67798	103.345	4.61706	880	1117
11155	LDB3	107.013	6.28356	1.13213	94.5237	4.17481	129.886	21.4955	881	690
10527	IPO7	106.991	1.41804	1.04396	102.486	6.20745	91.0406	15.4922	882	1299
5229	PGGT1B	106.974	16.1466	0.997175	107.277	3.43069	78.1521	6.79062	883	1757
49861	CLDN20	106.969	20.9888	1.16583	91.7533	4.25704	83.9176	23.3883	884	541
53405	CLIC5	106.934	6.23517	1.08141	98.8845	2.70109	112.791	11.3492	885	1006
9791	PTDSS1	106.901	47.5681	1.03437	103.349	0.270385	87.3244	16.492	886	1385
4147	MATN2	106.9	3.33261	1.05194	101.622	3.42791	106.445	21.7119	887	1228
8436	SDPR	106.9	4.88763	1.45931	73.2538	24.5134	29.8058	49.3955	888	79
4668	NAGA	106.886	9.40282	1.09996	97.1733	15.7715	146.101	20.0935	889	870
378925	RNF148	106.866	7.01799	1.10271	96.9125	6.43302	69.419	2.25753	890	855
5170	PDPK1	106.841	8.99157	1.08457	98.5096	5.35385	131.186	11.3733	891	984
5682	PSMA1	106.816	9.06701	1.20485	88.6549	5.22918	118.731	10.564	892	409
9469	CHST3	106.807	7.9801	0.865877	123.351	6.78926	87.9915	14.5345	893	3407
196743	PAOX	106.802	28.772	1.29332	82.58	10.5951	79.4457	4.00355	894	209
9507	ADAMTS4	106.792	5.01822	1.06786	100.005	1.63841	99.2028	2.5207	895	1105
10861	SLC26A1	106.784	5.37962	1.07377	99.4474	1.57167	119.783	41.9102	896	1066
686	BTD	106.77	4.37434	1.08944	98.004	9.63136	107.309	6.95161	897	942
80755	AARSD1	106.767	3.47231	1.0533	101.364	3.76367	122.705	19.0319	898	1216
219931	TPCN2	106.766	8.51336	1.12421	94.9695	9.55116	128.783	16.1787	899	727
7532	YWHAG	106.752	12.4692	0.851447	125.377	19.8613	108.828	25.6381	900	3573
64167	ERAP2	106.712	10.3754	0.97607	109.329	11.4638	107.807	22.4318	901	1963
5269	SERPINB6	106.683	4.55828	1.07228	99.4915	11.3496	96.2621	20.6646	902	1076
10257	ABCC4	106.682	13.2515	1.10917	96.182	3.32708	116.606	31.0509	903	816
26512	INTS6	106.673	2.75651	0.980182	108.83	0.454482	116.428	10.083	904	1923
118881	COMTD1	106.671	11.9311	0.931188	114.554	5.98663	69.9188	14.1101	905	2541
4998	ORC1L	106.657	1.8688	1.08358	98.4299	9.68571	84.2171	4.64322	906	992
3778	KCNMA1	106.643	7.31147	1.23263	86.5167	6.48866	206.114	31.8157	907	312
65997	RASL11B	106.627	1.97709	1.02453	104.074	7.96499	100.718	2.45739	908	1480
402	ARL2	106.626	3.69002	1.10287	96.6798	6.17717	116.277	21.6854	909	854
1112	FOXN3	106.624	7.67475	1.00297	106.308	12.2775	76.7345	21.3203	910	1709
382	ARF6	106.622	13.9802	1.32713	80.3403	6.40012	151.658	55.7124	911	167
23705	CADM1	106.602	0.121394	1.05989	100.578	2.35752	114.35	23.3886	912	1160
25930	PTPN23	106.598	17.6967	1.16722	91.3269	5.15826	132.732	24.1992	913	537
9187	SLC24A1	106.597	1.76041	1.05458	101.08	12.3803	125.121	14.423	914	1205
5286	PIK3C2A	106.596	25.2269	1.02277	104.223	1.46631	74.3355	14.4343	915	1506
522	ATP5J	106.589	9.69907	0.990514	107.61	8.55731	82.0771	16.3542	916	1826
274	BIN1	106.586	8.22505	1.10066	96.8377	1.90104	97.8888	16.1289	917	867
23659	PLA2G15	106.58	4.35958	1.097	97.1561	2.47203	99.7096	3.90601	918	883
547	KIF1A	106.58	3.49108	1.03503	102.972	4.84445	73.9869	11.9756	919	1377
83943	IMMP2L	106.563	13.9594	1.11112	95.9061	15.1213	139.431	26.0177	920	801
339403	RXFP4	106.563	18.4708	1.07938	98.7261	9.05393	117.346	8.44026	921	1019
11151	CORO1A	106.544	6.05055	1.08847	97.8841	1.62282	116.296	23.1754	922	949
517	ATP5G2	106.538	6.63597	0.973065	109.487	7.02927	97.9025	15.5467	923	2006
5021	OXTR	106.523	14.6915	1.02602	103.821	9.41165	82.2993	10.6054	924	1466
9666	DZIP3	106.512	6.71661	1.15309	92.3705	7.43525	174.924	19.4982	925	602
23438	HARS2	106.501	5.56543	1.04603	101.815	2.76715	101.891	4.61506	926	1283
2027	ENO3	106.5	8.11803	0.832215	127.972	9.07112	81.8648	8.21372	927	3776
88	ACTN2	106.495	25.494	1.10451	96.4187	5.39763	111.085	12.6749	928	844
7978	MTERF	106.477	13.4276	1.02852	103.525	3.72631	90.906	10.8989	929	1446
10419	PRMT5	106.476	4.35996	1.09226	97.4825	5.1509	118.469	6.21714	930	918
9080	CLDN9	106.42	2.9265						931	9000
4914	NTRK1	106.41	9.66898	1.05493	100.869	6.10938	100.565	4.99627	932	1201
4881	NPR1	106.391	7.32028	1.20596	88.2211	4.073	158.939	8.80202	933	407
7001	PRDX2	106.358	26.4475	1.07202	99.2122	5.23337	111.241	24.7791	934	1080
27350	APOBEC3C	106.291	4.68804	1.09841	96.7679	1.86709	137.95	42.3703	935	878
3840	KPNA4	106.279	5.57241	1.05908	100.349	7.79732	73.3333	8.54835	936	1169
79691	QTRTD1	106.259	3.41796	1.12014	94.8624	11.8956	116.623	14.6265	937	755
2134	EXTL1	106.246	2.37277	1.12159	94.7278	10.3983	73.7333	11.9267	938	745
28316	CDH20	106.241	0.477427	1.14776	92.5639	8.51954	110.166	6.06899	939	626
83694	RPS6KL1	106.234	2.71402	1.15546	91.9403	12.2531	188.294	14.7725	940	588
1337	COX6A1	106.208	3.63774	1.06438	99.7844	3.99959	85.8373	9.97097	941	1132
56603	CYP26B1	106.202	8.18901	1.14033	93.1331	5.11015	89.8234	13.5459	942	660
57107	PDSS2	106.184	5.54888	1.05983	100.19	5.65888	117.427	8.25543	943	1161
55186	SLC25A36	106.11	6.52769	1.07923	98.3202	3.22755	91.9611	8.76426	944	1022
7184	HSP90B1	106.11	2.33727	1.07908	98.3342	6.01087	142.003	15.1718	945	1026
8526	DGKE	106.102	6.43194	1.04315	101.714	0.677678	104.552	12.2469	946	1306
858	CAV2	106.098	11.2677	1.58787	66.8178	41.7979	191.193	93.0445	947	40
10558	SPTLC1	106.09	2.70484	1.07204	98.9608	1.58853	133.78	43.2881	948	1079
5747	PTK2	106.084	9.04824	1.10813	95.7329	1.9496	120.576	6.4934	949	823
378108	TRIM74	106.073	13.8887	0.91664	115.72	13.8564	94.3881	11.7326	950	2757
10390	CEPT1	106.07	5.11356	1.02729	103.253	7.07807	116.38	34.8473	951	1453
54495	TXNDC10	106.054	16.6625	0.973236	108.971	5.19527	85.4166	14.5286	952	2001
3887	KRT81	106.04	10.885	0.90276	117.462	2.92164	87.2952	29.4161	953	2944
8277	TKTL1	106.03	4.07535	1.00537	105.464	2.86825	132.417	7.75691	954	1671
4292	MLH1	106.028	11.8787	1.15256	91.9934	10.6588	159.712	43.3595	955	604
165721	DNAJB8	106.017	13.1343	1.12555	94.1915	10.5475	155.149	40.4086	956	723
4733	DRG1	106.009	6.7592	1.17642	90.1111	6.73034	147.915	30.1104	957	513
7352	UCP3	105.993	9.72289	1.01621	104.302	8.22873	226.282	122.541	958	1563
3889	KRT83	105.991	3.95449	0.998718	106.127	10.3347	72.1398	9.73742	959	1745
5119	CHMP1A	105.991	3.69777	1.04314	101.607	12.881	110.412	10.0308	960	1307
427	ASAH1	105.989	6.02413	1.03913	101.998	9.4476	97.8328	6.75735	961	1337
84282	RNF135	105.968	6.13463	0.991387	106.889	7.47172	139.306	41.3539	962	1819
3933	LCN1	105.96	11.9798	1.03439	102.437	4.29604	96.7325	10.627	963	1384
1314	COPA	105.95	4.55191	1.06834	99.172	3.01931	96.6977	5.62552	964	1103
3918	LAMC2	105.949	11.4671	1.09651	96.6235	12.2914	115.53	9.24181	965	888
2771	GNAI2	105.935	2.2312	1.04767	101.114	10.7349	98.3253	21.7376	966	1266
64794	DDX31	105.935	5.60238	1.08186	97.9191	2.1416	106.726	29.6796	967	1002
817	CAMK2D	105.933	2.0905	1.0267	103.178	4.81464	99.011	1.30363	968	1461
1592	CYP26A1	105.931	4.20008	1.05897	100.032	3.83917	121.837	34.1876	969	1170
8189	SYMPK	105.928	6.46533	1.0847	97.6563	1.68971	123.239	15.8959	970	983
10960	LMAN2	105.916	6.28202	0.841137	125.921	8.41476	123.213	14.7152	971	3689
513	ATP5D	105.916	4.62769	0.992015	106.769	5.39517	78.1875	14.3524	972	1812
4722	NDUFS3	105.906	4.70514	1.10531	95.8152	6.58378	114.387	19.8105	973	841
9293	GPR52	105.901	1.05725	0.988321	107.153	8.12494	90.5881	16.9262	974	1846
3875	KRT18	105.894	2.40792	1.02804	103.007	17.7172	88.702	14.8907	975	1449
10541	ANP32B	105.89	21.6748	1.08135	97.9237	3.28977	134.655	25.167	976	1007
1902	LPAR1	105.883	2.16902	1.07788	98.233	7.20535	123.493	50.8051	977	1034
246	ALOX15	105.882	6.28013						978	9000
37	ACADVL	105.88	13.1601	1.04199	101.613	8.90953	97.0461	20.0181	979	1314
23368	PPP1R13B	105.872	4.06472	1.19354	88.7047	5.40958	105.979	34.1156	980	446
9289	GPR56	105.858	0.843235	1.03531	102.247	9.30053	97.8772	12.4151	981	1373
25831	HECTD1	105.811	13.4541	1.04902	100.866	6.97165	112.123	15.9491	982	1253
9057	SLC7A6	105.8	7.75732	1.03871	101.857	11.305	154.616	5.78305	983	1340
143425	SYT9	105.792	15.2934	1.02492	103.22	4.63047	88.2781	17.4709	984	1474
51564	HDAC7	105.787	14.7123	1.07311	98.5794	5.73305	92.4435	9.58828	985	1069
93664	CADPS2	105.787	5.93961	1.03461	102.248	12.697	78.4794	13.3568	986	1382
5754	PTK7	105.787	2.64593	1.00228	105.546	6.97078	100.272	11.2548	987	1713
10670	RRAGA	105.783	0.927978	1.0094	104.798	7.63708	107.043	5.4039	988	1624
5768	QSOX1	105.781	28.6918	1.13938	92.8411	2.93812	100.32	13.4252	989	664
6368	CCL23	105.781	3.06099	1.00731	105.013	5.24302	138.387	26.6112	990	1649
6446	SGK1	105.773	2.05231	1.06685	99.1451	3.3628	104.765	6.29862	991	1115
30000	TNPO2	105.773	5.61738	1.18593	89.1896	2.77908	93.427	7.77937	992	481
23352	UBR4	105.772	1.77242	1.05088	100.651	2.0693	95.1895	12.5668	993	1241
3801	KIFC3	105.765	10.3014	1.03146	102.539	10.9601	79.9088	9.22017	994	1412
955	ENTPD6	105.758	8.54063	1.0868	97.3119	1.52191	88.9992	9.82883	995	965
1855	DVL1	105.749	3.79459	0.851733	124.158	19.6573	92.5513	4.73911	996	3568
549	AUH	105.729	6.37752	1.08083	97.8222	5.52377	107.728	7.37285	997	1009
5198	PFAS	105.713	33.6821	1.04062	101.587	2.02157	90.7136	4.05146	998	1324
6002	RGS12	105.691	8.84248	1.19094	88.7463	2.46666	101.629	7.68511	999	454
81542	TXNDC1	105.667	4.09855	1.03488	102.105	1.69047	109.934	3.7498	1000	1378
23195	MDN1	105.651	6.05317	0.975484	108.306	5.93152	112.844	30.5369	1001	1970
6016	RIT1	105.644	10.1838	1.11413	94.8225	5.9414	93.7571	10.8521	1002	785
162	AP1B1	105.638	9.52046	1.03258	102.305	6.37388	97.8588	25.7508	1003	1402
282974	STK32C	105.637	8.69247	1.04196	101.383	2.20592	98.1917	6.17803	1004	1315
2730	GCLM	105.612	4.93454	1.09098	96.8042	2.96337	66.3171	7.17426	1005	929
5980	REV3L	105.611	2.85678	1.18692	88.9795	15.2332	104.485	42.2171	1006	477
8650	NUMB	105.595	11.5901	1.01076	104.47	0.937706	100.426	15.532	1007	1611
309	ANXA6	105.591	4.94633	1.14025	92.6033	5.07968	107.208	15.7396	1008	661
59349	KLHL12	105.588	14.5513	1.15078	91.7532	6.51772	85.3047	13.7017	1009	613
7347	UCHL3	105.586	8.08127	1.09547	96.3844	8.80947	137.812	30.7679	1010	893
171177	RHOV	105.585	5.2481	1.02853	102.657	6.27922	99.4663	23.7802	1011	1445
23673	STX12	105.584	4.84695	1.03836	101.684	14.3411	96.4683	13.0349	1012	1344
1789	DNMT3B	105.555	2.70616	1.0489	100.634	1.40897	103.216	7.75677	1013	1255
23046	KIF21B	105.546	2.98472	1.34399	78.5313	10.5054	126.95	31.0892	1014	151
10717	AP4B1	105.533	6.50292	0.932832	113.132	9.79542	94.2767	9.64509	1015	2520
10283	SDCCAG10	105.488	3.46398	1.03767	101.658	8.48235	106.909	7.75895	1016	1352
285220	EPHA6	105.483	13.6064	0.973446	108.361	4.93523	89.5717	6.50727	1017	2000
55869	HDAC8	105.472	10.6297	0.980221	107.601	3.27153	82.1301	15.6586	1018	1921
11182	SLC2A6	105.47	13.1794	1.27333	82.8298	1.77238	142.371	30.5747	1019	244
5502	PPP1R1A	105.455	8.66369	1.06878	98.6683	10.9175	92.2329	13.0625	1020	1100
388677	NOTCH2NL	105.443	10.5441	1.10226	95.6612	5.87352	63.9716	23.4934	1021	858
493829	TRIM72	105.441	2.91564	1.00931	104.469	0.993618	98.6639	14.4571	1022	1629
5095	PCCA	105.419	10.5527	1.0449	100.889	7.75085	81.6289	8.45763	1023	1294
27087	B3GAT1	105.387	5.33994	1.01854	103.468	3.38069	118.361	21.5071	1024	1540
4521	NUDT1	105.361	0.610979	0.984652	107.004	3.85765	114.146	13.6924	1025	1879
63928	CHP2	105.343	15.3883	0.981259	107.355	1.12474	107.124	25.8261	1026	1912
6416	MAP2K4	105.338	7.37645	1.09531	96.1716	5.66531	95.5558	19.7986	1027	895
1163	CKS1B	105.336	9.34738	1.19831	87.9036	6.67829	111.476	6.46928	1028	433
997	CDC34	105.32	9.1008	0.955766	110.194	7.17168	83.6055	10.7462	1029	2235
6487	ST3GAL3	105.318	21.1711	1.28498	81.9605	22.9546	120.096	8.78964	1030	225
10465	PPIH	105.313	2.26979	1.02268	102.977	3.98024	116.61	20.9744	1031	1508
1192	CLIC1	105.31	3.39372	1.04525	100.751	11.5258	111.293	7.19025	1032	1291
66035	SLC2A11	105.307	2.11104	1.08019	97.4889	4.73292	105.563	6.34718	1033	1013
332	BIRC5	105.289	4.73163	1.28028	82.2386	4.83116	185.303	39.1258	1034	231
6809	STX3	105.267	6.10627	1.07602	97.8305	6.72745	125.819	8.2279	1035	1045
4718	NDUFC2	105.263	2.21317	1.05113	100.143	1.84322	108.471	22.0465	1036	1237
1643	DDB2	105.259	5.41685	1.07135	98.249	8.07903	103.495	17.3979	1037	1086
1793	DOCK1	105.256	6.66437	0.928278	113.388	4.55757	91.0021	5.97955	1038	2580
83637	ZMIZ2	105.243	4.24955	1.01931	103.249	4.10464	98.6716	12.8442	1039	1533
8797	TNFRSF10A	105.203	4.92572	1.01733	103.41	3.68537	116.218	17.6296	1040	1557
10344	CCL26	105.198	3.32348	1.13968	92.3048	4.06097	169.116	37.836	1041	663
53354	PANK1	105.196	10.7319	1.03456	101.682	2.22911	103.951	10.5093	1042	1383
23640	HSPBP1	105.193	12.1276	0.964688	109.044	5.92499	85.8207	9.24701	1043	2108
23567	ZNF346	105.179	13.5219	1.04323	100.821	4.16003	104.05	18.0396	1044	1305
4233	MET	105.165	6.90222	0.949745	110.73	5.76018	99.9165	21.9651	1045	2315
222068	TMED4	105.161	14.444	1.09262	96.2466	2.65422	97.2087	11.7833	1046	914
3303	HSPA1A	105.15	6.84337	1.14102	92.1548	6.82117	102.932	17.8858	1047	656
57590	WDFY1	105.146	6.50246	1.17812	89.2487	3.69834	165.627	4.79537	1048	505
10903	MTMR11	105.144	12.1987	1.05689	99.485	8.18208	100.235	8.10166	1049	1190
6309	SC5DL	105.135	6.60732	1.04641	100.472	10.0331	99.9518	6.08709	1050	1278
826	CAPNS1	105.123	2.75385	1.01896	103.167	3.68575	136.12	38.0883	1051	1538
49	ACR	105.117	8.36618	1.10574	95.0643	11.2863	118.204	14.9914	1052	838
81704	DOCK8	105.101	16.349	1.25339	83.8532	14.2529	162.664	7.70512	1053	276
9743	RICS	105.1	7.88757	1.34518	78.1306	6.62373	142.313	26.9723	1054	147
7109	TRAPPC10	105.099	11.2586	1.03765	101.286	4.4675	101.089	21.4899	1055	1353
645922	S100A7L2	105.075	3.22468	0.994818	105.622	5.29595	100.197	23.7621	1056	1786
875	CBS	105.065	3.01504	1.07919	97.3556	7.50296	146.105	24.8573	1057	1023
253430	IPMK	105.064	2.62075	1.0218	102.822	6.58788	81.7201	3.14363	1058	1517
5264	PHYH	105.055	1.40779	1.01958	103.037	7.42079	107.807	8.08304	1059	1531
79852	ABHD9	105.047	5.18173	1.02256	102.73	2.88591	99.821	21.6491	1060	1511
56138	PCDHA11	105.047	10.354	1.09919	95.5682	10.3468	102.517	40.0416	1061	872
84705	GTPBP3	105.041	3.54255	1.0228	102.7	7.59998	120.272	24.7225	1062	1505
89122	TRIM4	105.028	8.42975	1.06354	98.7526	6.51518	99.5646	19.3872	1063	1138
10079	ATP9A	105.01	6.56316	1.07471	97.7101	11.1385	98.4084	17.6088	1064	1053
10039	PARP3	105.005	3.4599	1.08723	96.5807	6.46217	105.14	33.5551	1065	958
4323	MMP14	105.003	3.90442	1.07251	97.9039	0.272792	126.178	8.57001	1066	1072
9622	KLK4	104.992	8.36778	1.03248	101.688	7.56094	101.538	3.09859	1067	1403
10495	ENOX2	104.963	7.20037	1.05631	99.3676	4.19258	158.816	10.6628	1068	1192
60528	ELAC2	104.922	0.350004	0.960234	109.267	0.861105	102.452	21.3273	1069	2169
55929	DMAP1	104.907	6.72858	1.14399	91.7029	31.7205	100.588	17.8169	1070	637
8623	ASMTL	104.895	5.15071	1.01191	103.661	9.75552	135.609	20.7409	1071	1599
59307	SIGIRR	104.89	4.13528	1.12666	93.0986	4.70274	86.1907	16.8729	1072	719
10057	ABCC5	104.887	9.43966	1.03826	101.022	2.80171	93.5118	11.5112	1073	1345
5564	PRKAB1	104.887	23.2415	0.969295	108.21	1.82002	119.612	5.57038	1074	2052
29988	SLC2A8	104.874	24.5655	1.12335	93.3588	9.84726	101.095	11.0845	1075	733
8824	CES2	104.849	7.87054	1.14543	91.5371	17.4137	139.476	28.1922	1076	633
1642	DDB1	104.833	3.28972	1.03884	100.913	1.35462	100.625	24.1119	1077	1339
26290	GALNT8	104.818	11.3485	0.959114	109.287	3.29484	117.552	16.0126	1078	2182
29893	PSMC3IP	104.814	7.08792	1.07212	97.7633	10.1361	102.613	21.8999	1079	1078
9060	PAPSS2	104.805	2.67606	1.04124	100.654	1.99403	85.1698	6.20129	1080	1320
5518	PPP2R1A	104.795	2.7128	0.988825	105.979	6.15786	125.235	25.3934	1081	1841
1468	SLC25A10	104.794	0.279639	1.08694	96.4124	2.64161	98.5083	15.6111	1082	963
81706	PPP1R14C	104.791	26.4129	0.998953	104.901	6.00918	95.1807	14.7689	1083	1742
5683	PSMA2	104.769	1.64515	1.09913	95.3203	2.48083	98.8746	14.5761	1084	874
51170	HSD17B11	104.754	4.62975	1.03721	100.996	4.71671	140.363	23.2992	1085	1358
221078	NSUN6	104.705	3.92059	1.11879	93.5877	5.28606	104.264	7.47704	1086	763
23597	ACOT9	104.691	7.66127	1.02469	102.168	0.0662093	101.131	11.96	1087	1477
27000	DNAJC2	104.688	11.4728	1.14033	91.8049	10.7795	91.9562	8.4459	1088	659
3176	HNMT	104.683	3.51411	1.02075	102.555	7.93987	133.465	37.9585	1089	1527
29920	PYCR2	104.682	10.5891	1.1088	94.4093	3.53699	113.586	17.3734	1090	818
8604	SLC25A12	104.666	1.20903	1.00182	104.476	11.1356	101.405	23.5817	1091	1717
268	AMH	104.654	6.13595	1.05807	98.9097	5.24082	141.668	29.4442	1092	1176
10516	FBLN5	104.653	3.38171	0.983116	106.451	2.92627	123.324	8.86738	1093	1894
57380	MRS2	104.648	9.01258	1.01757	102.841	4.4115	139.893	33.8861	1094	1553
7799	PRDM2	104.632	7.2331	1.00598	104.01	6.83175	96.8533	18.0125	1095	1664
7867	MAPKAPK3	104.622	2.35795	1.02459	102.112	5.74556	89.0174	19.4008	1096	1478
10598	AHSA1	104.588	8.2206	1.04801	99.7965	1.88313	179.669	28.1727	1097	1260
4703	NEB	104.568	17.3311	1.04499	100.066	7.07857	101.46	13.9056	1098	1293
5073	PARN	104.563	15.0496	1.07502	97.2661	3.16261	67.785	2.21535	1099	1052
5653	KLK6	104.555	7.2197	1.10836	94.3331	0.432377	105.591	26.5287	1100	821
9230	RAB11B	104.529	18.9027	1.07661	97.0914	2.23224	80.4788	13.0931	1101	1041
84333	PCGF5	104.515	6.32525	1.13214	92.3161	0.757412	87.2753	23.9194	1102	689
9200	PTPLA	104.509	8.30484	1.03348	101.124	9.78619	142.795	16.4905	1103	1395
3868	KRT16	104.509	8.19468	1.04924	99.6042	10.5431	111.376	7.23512	1104	1251
23409	SIRT4	104.495	2.62459						1105	9000
6923	TCEB2	104.486	5.05983	1.06737	97.891	3.26915	89.5494	15.4467	1106	1109
744	MPPED2	104.48	4.18945	1.04769	99.7247	4.10803	129.716	15.8341	1107	1265
6091	ROBO1	104.479	8.7167	1.08056	96.6896	3.5454	93.5647	13.9135	1108	1011
26469	PTPN18	104.458	6.99157	1.07914	96.7982	3.25488	103.778	5.15369	1109	1025
5869	RAB5B	104.455	4.89046	1.14998	90.8317	10.2734	111.179	18.9107	1110	618
57835	SLC4A5	104.454	5.4775	1.01831	102.576	5.92599	104.648	23.4943	1111	1543
94121	SYTL4	104.441	12.3349	1.11012	94.081	6.64232	118.245	9.62862	1112	808
65263	PYCRL	104.439	7.30444	0.999951	104.445	7.40727	90.9849	7.35985	1113	1734
27231	ITGB1BP3	104.435	14.5465	1.04295	100.135	3.22254	113.824	17.5814	1114	1308
6609	SMPD1	104.425	14.7528	1.04801	99.6414	7.1999	110.38	19.1854	1115	1261
5524	PPP2R4	104.423	9.27163	0.979666	106.59	5.9648	98.4658	0.552502	1116	1931
2674	GFRA1	104.402	3.25889	1.0248	101.876	7.40649	98.3441	35.7602	1117	1476
5163	PDK1	104.384	4.21796	1.07189	97.3828	2.07744	102.125	19.0504	1118	1081
57559	STAMBPL1	104.384	11.9691	1.05335	99.0965	4.7652	85.2461	3.645	1119	1215
8851	CDK5R1	104.379	12.2791	1.08478	96.2211	8.37402	91.7657	19.369	1120	981
695	BTK	104.376	16.2047	1.00424	103.935	3.83282	100.969	16.7069	1121	1690
57408	LRTM1	104.346	2.02996	0.995911	104.774	3.57128	79.881	11.6851	1122	1771
201780	SLC10A4	104.342	8.56163	1.02564	101.733	9.46389	134.134	14.8885	1123	1467
1956	EGFR	104.341	15.18	1.01301	103	4.12861	129.457	8.65797	1124	1587
391	RHOG	104.336	20.4216	1.08762	95.9307	12.5005	130.641	19.5909	1125	955
9373	PLAA	104.275	10.8803	1.17794	88.5233	11.5801	101.229	27.8603	1126	506
1595	CYP51A1	104.271	25.4636	1.05203	99.1139	9.17044	95.2962	3.22261	1127	1226
3903	LAIR1	104.253	1.06505	1.08198	96.3545	7.71685	112.872	16.8992	1128	1001
55578	FAM48A	104.25	5.53793	1.26845	82.1873	7.72054	180.397	39.9376	1129	256
9765	ZFYVE16	104.232	16.0265	1.10722	94.1381	5.05681	131.554	30.5886	1130	828
2101	ESRRA	104.229	0.94636	1.49192	69.8625	48.3451	130.793	32.5738	1131	63
5515	PPP2CA	104.216	1.43093	1.07183	97.2319	3.4015	132.079	36.5105	1132	1082
978	CDA	104.164	9.56418	1.14385	91.0646	2.23599	104.414	26.4476	1133	638
25771	TBC1D22A	104.151	9.35064	1.13043	92.1344	6.80084	97.5642	14.1597	1134	697
29922	NME7	104.149	26.519	1.09361	95.2338	8.56524	118.903	36.8928	1135	903
51056	LAP3	104.148	6.18209	0.940375	110.751	5.70582	87.2183	20.7751	1136	2430
23452	ANGPTL2	104.142	5.72917	0.988179	105.388	1.16307	88.8836	18.9402	1137	1849
9331	B4GALT6	104.139	5.20212	1.29811	80.2233	16.3608	175.103	57.4865	1138	201
55327	LIN7C	104.138	3.50453	1.03824	100.302	2.92836	93.5918	10.8609	1139	1346
57144	PAK7	104.121	13.0753	1.02875	101.211	2.61722	133.823	11.2716	1140	1443
5908	RAP1B	104.111	6.63479	0.960961	108.34	10.8683	100.096	10.4232	1141	2156
8658	TNKS	104.107	4.9179	1.01446	102.623	1.52314	97.5461	3.06729	1142	1573
9231	DLG5	104.099	4.53861	0.984081	105.783	2.61323	110.922	22.1433	1143	1883
7917	BAT3	104.082	5.21666	1.06502	97.7272	0.829686	117.306	27.6125	1144	1128
2564	GABRE	104.057	3.50245	1.1186	93.0242	4.07686	95.1657	13.4065	1145	765
643	CXCR5	104.05	6.5409	1.08225	96.1424	4.03713	75.1306	3.73644	1146	1000
79001	VKORC1	104.032	6.72708	1.06531	97.6543	10.1075	83.9209	16.1413	1147	1127
3625	INHBB	104.031	12.2649	1.22606	84.8499	13.532	223.636	71.0636	1148	330
10270	AKAP8	104.007	2.09965	1.10336	94.2631	6.60597	129.962	18.9469	1149	849
64744	SMAP2	104.002	4.09141	1.05231	98.832	2.22032	101.72	7.56739	1150	1223
138151	BTBD14A	104	8.28466	0.9533	109.094	7.80866	104.862	3.03695	1151	2271
4864	NPC1	103.993	10.6476	1.07713	96.5461	4.56771	99.2467	22.7942	1152	1040
4772	NFATC1	103.981	7.45061	0.911825	114.037	6.80163	104.924	13.9032	1153	2812
64096	GFRA4	103.974	9.31744	0.989474	105.081	4.17565	111.243	16.8337	1154	1831
55217	TMLHE	103.967	12.2959	1.12221	92.6449	20.4906	89.2724	18.5732	1155	742
8986	RPS6KA4	103.952	0.769206	1.08699	95.6331	5.93783	121.113	3.12798	1156	962
9066	SYT7	103.952	2.26592	1.21728	85.3974	29.399	165.802	41.4602	1157	369
8499	PPFIA2	103.95	10.0535	0.987302	105.287	4.1632	98.4447	7.55923	1158	1861
54920	DUS2L	103.946	12.3752	1.11156	93.5133	1.96939	115.282	15.8103	1159	799
2686	GGT7	103.911	10.7597	1.03656	100.246	3.59337	105.602	23.6181	1160	1361
5428	POLG	103.894	11.7928	1.02454	101.405	5.42799	96.3701	18.1003	1161	1479
6760	SS18	103.89	5.38791	1.05776	98.2172	3.62287	78.4154	8.25657	1162	1181
23382	AHCYL2	103.881	3.9015	1.02185	101.659	6.81209	102	10.3545	1163	1516
6472	SHMT2	103.864	11.3818	1.02633	101.2	4.03022	155.561	13.2444	1164	1462
8243	SMC1A	103.844	0.793406	1.06114	97.8605	3.64479	137.542	10.3184	1165	1158
669	BPGM	103.837	8.32372	1.00472	103.349	5.34207	93.6576	6.32925	1166	1682
5863	RGL2	103.836	2.53057	1.03325	100.495	6.57469	155.588	27.8119	1167	1397
1025	CDK9	103.833	23.1663	0.966355	107.448	4.86252	95.5487	2.52441	1168	2081
56993	TOMM22	103.81	4.81267	1.18489	87.6113	27.1523	136.636	61.4621	1169	484
51726	DNAJB11	103.764	3.58367	1.05429	98.4203	4.69731	97.8183	6.09331	1170	1207
55501	CHST12	103.764	5.4509	1.05735	98.1357	8.86601	89.2353	17.8144	1171	1186
56052	ALG1	103.759	14.2539	1.08337	95.774	1.33005	151.786	50.3833	1172	994
23113	PARC	103.755	16.4638	0.994591	104.319	1.59573	113.342	4.08441	1173	1790
5230	PGK1	103.751	6.00952	1.01349	102.37	6.1621	90.1067	7.27225	1174	1585
25984	KRT23	103.749	3.11706	1.0296	100.766	2.3277	85.653	16.5916	1175	1433
8895	CPNE3	103.747	24.9239	1.16328	89.1854	5.66304	93.0082	28.4018	1176	555
57337	SENP7	103.734	2.74469	0.972341	106.685	7.18643	105.125	11.5837	1177	2011
6585	SLIT1	103.726	11.5298	0.948201	109.392	8.69488	102.649	18.0476	1178	2334
3817	KLK2	103.724	5.3117	0.979059	105.942	2.54196	106.233	17.8178	1179	1935
4185	ADAM11	103.723	11.9047	1.09002	95.1573	8.16984	132.371	18.4656	1180	935
2247	FGF2	103.718	37.7823	1.07077	96.8631	13.0181	108.995	1.24517	1181	1092
26035	GLCE	103.712	11.1452	1.04613	99.1389	10.4735	122.269	5.74812	1182	1281
84679	SLC9A7	103.704	6.24472	0.954378	108.661	7.13008	104.872	3.18344	1183	2260
5293	PIK3CD	103.699	2.96127	0.99699	104.012	8.98267	102.904	16.4337	1184	1758
904	CCNT1	103.687	2.41038	0.872076	118.896	5.34388	116.241	19.3675	1185	3324
1734	DIO2	103.684	6.74083	0.971804	106.692	4.28337	88.6758	18.0618	1186	2018
1808	DPYSL2	103.682	5.04831	1.0122	102.432	5.78747	106.187	11.2034	1187	1596
6715	SRD5A1	103.666	6.63553	1.03298	100.356	5.62599	111.381	11.2616	1188	1400
288	ANK3	103.652	9.93763	1.03065	100.57	8.69461	117.706	28.9095	1189	1419
51303	FKBP11	103.651	6.52016	1.05776	97.9911	5.06638	119.966	21.7135	1190	1180
6714	SRC	103.65	9.23282	1.1966	86.6206	21.7365	158.253	54.8958	1191	440
3292	HSD17B1	103.627	6.60552	1.04617	99.0536	4.36432	111.907	22.1824	1192	1280
1263	PLK3	103.613	6.3963	1.01819	101.762	2.25691	98.2767	9.71179	1193	1545
23016	EXOSC7	103.605	5.41192	1.28174	80.8314	8.06399	94.445	30.3331	1194	230
3595	IL12RB2	103.6	13.0499	0.921648	112.408	6.71302	106.785	11.2265	1195	2682
23517	SKIV2L2	103.593	7.28383	1.10869	93.437	6.93228	140.229	9.97376	1196	819
5917	RARS	103.587	4.49693	0.956092	108.344	4.74171	93.6497	5.65525	1197	2229
5062	PAK2	103.582	4.32923	1.01689	101.861	1.82701	95.4281	17.9509	1198	1560
3276	PRMT1	103.581	7.14312	1.12297	92.2385	0.075735	121.055	22.4988	1199	736
8573	CASK	103.58	14.5499	0.974044	106.34	4.80935	74.8565	16.4682	1200	1992
56133	PCDHB2	103.566	7.07737	1.17953	87.8022	30.6332	166.54	38.7988	1201	503
23562	CLDN14	103.561	4.33008	1.02517	101.018	1.33047	113.723	28.2096	1202	1471
5568	PRKACG	103.488	5.84633	1.07454	96.3083	3.51718	161.231	23.0028	1203	1055
9860	LRIG2	103.462	7.57865	1.07785	95.9893	4.12707	90.4294	22.3537	1204	1035
22929	SEPHS1	103.459	4.17852	1.14579	90.295	6.81713	105.072	31.8225	1205	631
486	FXYD2	103.458	6.32743	0.970367	106.617	11.2962	78.1586	7.36882	1206	2039
5271	SERPINB8	103.448	14.8413	1.15889	89.2646	12.0866	106.95	17.9921	1207	572
1104	RCC1	103.441	3.34744	1.01468	101.944	9.18645	99.7479	16.723	1208	1571
7301	TYRO3	103.435	15.4152	1.17131	88.3073	4.97529	116.506	15.6882	1209	520
57826	RAP2C	103.429	7.44106	1.01227	102.176	1.7507	79.2288	7.3767	1210	1595
119	ADD2	103.425	10.0601	1.06196	97.3903	8.59826	90.1913	8.25283	1211	1151
1778	DYNC1H1	103.42	12.2589	0.995438	103.894	2.77609	194.613	39.3602	1212	1777
23551	RASD2	103.404	5.10181	1.10485	93.5913	3.85348	173.896	24.5455	1213	843
1350	COX7C	103.403	5.25271	0.960628	107.641	4.43625	79.4953	16.9904	1214	2164
790	CAD	103.399	4.26928	1.04124	99.3041	7.51707	103.234	22.0113	1215	1321
7298	TYMS	103.398	3.10434	0.929758	111.21	7.48192	100.161	23.3947	1216	2564
5655	KLK10	103.396	3.66981	0.970747	106.512	5.4076	112.44	10.402	1217	2032
9501	RPH3AL	103.378	8.27277	1.02978	100.389	1.34945	116.745	17.8331	1218	1428
7053	TGM3	103.378	9.67752	1.12094	92.2248	9.43404	98.8294	40.7987	1219	751
9311	ACCN3	103.378	9.77558	1.05303	98.1717	3.1406	142.379	14.9761	1220	1218
331	XIAP	103.372	7.48277	1.10107	93.8829	6.16133	91.0892	16.8737	1221	865
2671	GFER	103.347	11.1667	0.941204	109.803	5.56581	103.226	2.95254	1222	2419
10110	SGK2	103.341	2.13342	1.12376	91.9604	9.2049	87.9305	11.531	1223	728
1515	CTSL2	103.34	8.03896	0.997367	103.613	7.81428	138.67	28.8297	1224	1755
54539	NDUFB11	103.326	10.4358	0.914518	112.984	7.72484	100.755	5.5391	1225	2788
7264	TSTA3	103.322	11.5468	0.962124	107.39	6.94868	94.8068	9.54977	1226	2140
666	BOK	103.319	1.71732	0.992665	104.082	2.61278	114.328	18.19	1227	1807
5291	PIK3CB	103.292	3.77002	0.996615	103.643	9.10909	105.424	14.5557	1228	1763
4338	MOCS2	103.284	0.208256	0.934371	110.539	1.90658	79.919	11.6762	1229	2501
64840	PORCN	103.282	40.1963	1.16614	88.5669	2.09363	97.8247	14.1961	1230	540
203447	NRK	103.281	18.6089	0.994693	103.832	9.98218	80.3799	17.4464	1231	1788
84936	ZFYVE19	103.279	5.52615	0.983119	105.052	5.10292	85.9323	32.1864	1232	1893
79813	EHMT1	103.272	4.90433	1.11159	92.9048	5.98121	134.825	14.1607	1233	798
7386	UQCRFS1	103.271	3.85803	1.11873	92.311	7.47238	106.864	15.6314	1234	764
22859	LPHN1	103.255	6.06209	0.933507	110.61	8.29537	118.662	18.7036	1235	2513
130535	KCTD18	103.249	8.30648	1.0144	101.783	2.99508	98.3391	21.9823	1236	1575
2829	XCR1	103.248	9.64523	1.00981	102.245	3.82894	85.1397	14.8383	1237	1620
221037	JMJD1C	103.238	1.14395	1.06652	96.7995	7.85262	107.248	32.3625	1238	1118
23644	EDC4	103.162	2.33296	1.03175	99.9878	0.519333	102.952	15.6124	1239	1406
124739	USP43	103.161	11.8932	1.00778	102.365	4.74973	97.27	4.99688	1240	1644
6616	SNAP25	103.158	5.10877	1.0133	101.804	6.35603	86.7384	17.7743	1241	1586
55251	PCMTD2	103.154	15.648	0.946462	108.989	7.21072	82.226	15.4644	1242	2356
9972	NUP153	103.15	13.0539	1.15766	89.1024	2.46074	150.732	52.0973	1243	575
8438	RAD54L	103.13	9.36704	1.07543	95.8962	8.53179	128.408	7.15701	1244	1050
119559	SFXN4	103.127	8.04909	0.901964	114.336	11.5847	102.015	5.18017	1245	2951
10797	MTHFD2	103.115	7.68522	0.989013	104.261	0.925635	94.6004	12.2207	1246	1838
51727	CMPK1	103.103	3.20853	1.12705	91.4799	1.26178	105.625	7.67699	1247	716
6856	SYPL1	103.102	19.4245	1.08008	95.4576	3.82429	88.8648	10.712	1248	1016
57477	SHROOM4	103.061	16.1918	1.16369	88.5638	5.82444	127.22	20.9996	1249	554
83440	ADPGK	103.059	7.36755	1.03026	100.032	2.8938	95.1654	11.1996	1250	1423
116844	LRG1	103.049	6.73303	1.11496	92.4243	4.55319	146.043	18.9618	1251	780
656	BMP8B	103.038	2.84832	1.00237	102.794	3.76532	108.431	15.4524	1252	1712
5321	PLA2G4A	103.016	9.64555	0.906802	113.604	5.78257	93.9163	6.89319	1253	2873
30968	STOML2	103.004	18.3004	1.07105	96.1707	3.35837	112.426	4.9581	1254	1090
5289	PIK3C3	102.985	7.67711	1.06635	96.5775	7.00949	135.507	18.0547	1255	1120
5912	RAP2B	102.981	5.59287	0.982784	104.785	3.50457	123.455	26.6509	1256	1897
5007	OSBP	102.952	10.4142	1.01052	101.88	6.34035	83.9963	13.9012	1257	1612
10808	HSPH1	102.939	8.84926	1.03605	99.3579	2.71136	94.3704	2.90373	1258	1366
7443	VRK1	102.92	6.52422	1.01107	101.793	5.49881	94.1264	12.6183	1259	1609
5596	MAPK4	102.911	8.75751	1.05422	97.6181	2.74666	122.376	28.5009	1260	1208
25839	COG4	102.892	9.84165	1.08501	94.8298	1.48135	99.2465	20.076	1261	980
29102	RNASEN	102.888	0.645424	1.04405	98.5468	5.72723	123.224	9.44623	1262	1298
2593	GAMT	102.877	14.1986	0.978621	105.124	7.09223	78.9692	15.5696	1263	1937
3062	HCRTR2	102.874	16.0934	0.881199	116.743	9.40064	88.9066	11.3602	1264	3206
1434	CSE1L	102.865	5.74474	1.04656	98.2886	3.78165	107.177	27.2379	1265	1274
55140	ELP3	102.854	4.31747	1.17576	87.4784	12.9286	97.026	25.5848	1266	515
57211	GPR126	102.852	3.6663	0.954864	107.714	6.04663	152.543	9.26667	1267	2252
9016	SLC25A14	102.852	6.75742	1.0175	101.083	3.93504	117.266	7.80399	1268	1556
515	ATP5F1	102.848	5.87065	1.01937	100.893	2.46574	93.6501	14.2076	1269	1532
10743	RAI1	102.842	18.069	1.13274	90.7906	10.4023	152.478	9.77332	1270	686
10890	RAB10	102.823	36.1839	1.0691	96.1772	8.45993	76.5364	5.34687	1271	1098
84656	N-PAC	102.809	4.63167	1.03396	99.4324	5.22332	101.814	15.8259	1272	1389
54205	CYCS	102.797	9.1404	0.968486	106.142	6.34021	119.858	30.2022	1273	2062
23729	SHPK	102.788	1.16616	1.02905	99.8863	4.57957	143.686	17.1478	1274	1440
894	CCND2	102.781	10.3546	0.973791	105.548	10.3901	107.383	14.2505	1275	1995
60681	FKBP10	102.774	5.63918	1.11452	92.213	6.77071	81.3023	12.4209	1276	782
22916	NCBP2	102.773	0.498055	1.29308	79.4794	12.1588	125.282	18.1515	1277	212
2801	GOLGA2	102.772	4.6386	1.04047	98.7745	3.68107	118.079	11.6147	1278	1328
11056	DDX52	102.757	12.7078	1.00493	102.253	7.89481	84.5752	7.85735	1279	1678
55819	RNF130	102.752	14.8972	0.988719	103.925	1.9958	102.14	20.733	1280	1843
10174	SORBS3	102.745	7.49075	1.15073	89.2867	19.6759	251.182	254.753	1281	614
57171	DOLPP1	102.745	8.23841	0.956839	107.379	4.37776	102.733	9.42994	1282	2218
23760	PITPNB	102.73	6.81167	1.10333	93.1086	7.40866	96.7177	26.8461	1283	850
9570	GOSR2	102.729	5.11519	1.09882	93.4897	6.80927	104.708	10.255	1284	876
7351	UCP2	102.727	1.24339	0.992632	103.489	0.736289	132.707	4.1626	1285	1808
6262	RYR2	102.69	10.1121	1.05209	97.6052	12.4353	130.877	36.891	1286	1224
2734	GLG1	102.689	5.35085	1.19619	85.847	17.5423	104.545	25.4156	1287	441
8876	VNN1	102.679	2.79488	1.17099	87.6855	11.6932	123.347	36.2715	1288	522
435	ASL	102.676	5.86543	1.00216	102.454	3.76512	62.3602	22.7463	1289	1715
9625	AATK	102.675	1.79718	1.19677	85.7935	9.79892	109.359	11.8902	1290	439
10131	TRAP1	102.655	5.72917	1.05365	97.428	3.63422	80.321	15.7643	1291	1211
5333	PLCD1	102.649	9.28297	0.959	107.037	8.81031	73.2546	6.49893	1292	2184
4831	NME2	102.648	6.64353	0.989348	103.754	3.37048	110.516	25.6052	1293	1834
467	ATF3	102.636	4.0018	0.924461	111.022	14.8023	91.9099	12.8878	1294	2640
8408	ULK1	102.628	5.3712	1.05168	97.5854	6.36967	108.641	23.5721	1295	1231
8881	CDC16	102.625	7.75547	1.0168	100.93	2.89636	161.033	36.9549	1296	1561
5480	PPIC	102.613	9.26948	1.17643	87.2245	8.20188	124.362	10.0828	1297	512
83452	RAB33B	102.613	7.07707	1.12274	91.3952	7.63495	102.561	2.84735	1298	738
2319	FLOT2	102.609	4.79662	1.00409	102.19	9.8521	85.7532	11.7848	1299	1692
5361	PLXNA1	102.607	5.78227	0.941856	108.941	5.44257	97.5422	9.84353	1300	2410
6364	CCL20	102.596	27.002	0.947298	108.304	1.93445	95.7176	16.0501	1301	2343
56127	PCDHB9	102.587	4.22034	0.995554	103.045	4.06904	108.163	25.0442	1302	1775
6550	SLC9A3	102.568	10.8439	0.951423	107.805	6.49321	66.7772	7.71129	1303	2298
10845	CLPX	102.555	1.62814	1.06381	96.4039	6.04359	102.294	15.7428	1304	1136
29952	DPP7	102.555	7.76379	1.09731	93.4603	4.78061	123.806	10.4153	1305	882
57142	RTN4	102.553	14.4368	0.981998	104.433	7.97399	99.3592	14.3801	1306	1905
4216	MAP3K4	102.541	0.235107	0.995934	102.96	2.25612	99.0396	12.7954	1307	1770
1059	CENPB	102.541	4.36749	1.00083	102.456	5.54152	97.1604	21.1388	1308	1725
8021	NUP214	102.54	10.0282	1.1118	92.2289	2.7917	104.317	12.1859	1309	796
56001	NXF2	102.54	5.67775	1.03031	99.5238	2.7085	107.441	17.104	1310	1422
3356	HTR2A	102.533	8.71507	0.934152	109.761	8.93178	109.773	5.08725	1311	2506
81894	SLC25A28	102.504	5.99983	1.02198	100.299	2.90063	92.7913	13.1456	1312	1514
5764	PTN	102.503	3.75821	1.00113	102.387	2.74845	83.0203	7.30445	1313	1724
64327	LMBR1	102.501	1.48072	0.968362	105.85	0.81965	91.9606	4.80731	1314	2065
8398	PLA2G6	102.494	3.82961	1.00929	101.551	0.308634	161.88	27.2535	1315	1630
10227	MFSD10	102.493	9.55344	0.908153	112.858	7.52194	106.702	16.0988	1316	2848
79602	ADIPOR2	102.488	1.56359	1.11155	92.2028	13.8166	97.3634	19.3258	1317	800
5753	PTK6	102.418	4.89668	0.98741	103.724	8.76087	97.0659	4.74311	1318	1860
64800	EFCAB6	102.402	8.14745	1.00692	101.698	7.54573	126.692	12.8207	1319	1654
79589	RNF128	102.386	13.1541	1.32023	77.5512	5.60059	86.3812	14.5472	1320	177
1019	CDK4	102.385	3.59892	0.952253	107.519	7.34117	104.767	17.0667	1321	2287
83892	KCTD10	102.382	5.5291	1.10817	92.3883	2.81857	145.935	8.32239	1322	822
2936	GSR	102.382	7.15669	1.08997	93.931	3.9511	127.705	24.0789	1323	936
1465	CSRP1	102.366	2.40588	1.0445	98.0051	6.23423	119.603	18.4923	1324	1295
9990	SLC12A6	102.365	15.823	1.08043	94.745	4.41976	121.018	7.613	1325	1012
4157	MC1R	102.359	13.3293	1.04686	97.7776	13.0819	99.7456	5.33574	1326	1271
8910	SGCE	102.359	5.65242	0.950511	107.689	6.04848	120.13	21.5765	1327	2310
7137	TNNI3	102.356	3.75412	1.06566	96.0501	3.20793	97.6768	8.85509	1328	1125
8518	IKBKAP	102.34	9.50047	1.04738	97.7105	4.01098	99.9735	6.58443	1329	1268
10206	TRIM13	102.331	5.96579	1.11008	92.1829	4.57755	87.1779	5.64987	1330	809
8732	RNGTT	102.325	4.04633	0.966508	105.871	7.3552	94.1291	2.70181	1331	2079
4063	LY9	102.312	5.50383	1.0704	95.5828	5.46642	131.607	26.235	1332	1094
2690	GHR	102.309	9.20818	0.994454	102.879	2.69567	105.873	4.17794	1333	1792
9378	NRXN1	102.292	10.7533	0.977347	104.663	6.87659	151.919	27.7651	1334	1950
6804	STX1A	102.283	6.10513	1.03711	98.623	8.51894	126.355	14.2408	1335	1359
10016	PDCD6	102.28	0.89813	0.99427	102.87	6.62695	138.897	26.4149	1336	1794
9844	ELMO1	102.276	6.01829	1.05612	96.8412	2.51157	124.373	15.285	1337	1195
3587	IL10RA	102.273	7.98462	0.993452	102.947	4.23845	122.753	13.7666	1338	1802
339976	TRIML1	102.272	5.19808	1.05109	97.3016	6.38766	112.34	8.71958	1339	1238
9973	CCS	102.268	5.20807	1.21062	84.476	4.05187	173.354	27.0293	1340	392
1400	CRMP1	102.259	7.87091	0.957835	106.761	12.1207	87.3546	12.3452	1341	2203
4628	MYH10	102.232	14.1259	0.947999	107.84	4.28253	99.9681	34.5295	1342	2336
3419	IDH3A	102.214	2.91787	1.00372	101.835	4.52091	133.276	23.8867	1343	1699
56616	DIABLO	102.199	8.3724	1.00762	101.426	3.21179	122.481	14.9194	1344	1645
57486	NLN	102.195	13.2071	1.07761	94.8344	9.71748	100.133	30.2029	1345	1038
4296	MAP3K11	102.185	7.81984	1.06706	95.7626	7.66844	126.873	21.6625	1346	1114
51208	CLDN18	102.124	14.4738	1.03239	98.9197	9.92346	87.5588	21.1009	1347	1404
1826	DSCAM	102.123	0.798951	0.982063	103.988	5.48941	78.0514	9.77357	1348	1904
8723	SNX4	102.119	10.4478	1.06373	96.0007	3.6341	125.116	9.12603	1349	1137
374907	B3GNT8	102.113	4.96751	0.991702	102.967	18.1979	142.375	29.9896	1350	1813
2912	GRM2	102.1	15.7656	0.89373	114.24	3.28879	84.9963	11.7464	1351	3052
9781	RNF144A	102.084	5.69276	0.980663	104.097	5.02429	124.96	15.2575	1352	1918
5296	PIK3R2	102.083	8.28481	0.988676	103.252	6.62477	100.805	13.8681	1353	1844
5578	PRKCA	102.071	3.00901	1.01386	100.676	1.96135	112.596	5.59136	1354	1583
1345	COX6C	102.068	10.9682	0.928402	109.94	6.26271	77.9994	9.55091	1355	2579
54926	UBE2R2	102.039	12.174	1.04645	97.5102	2.22664	114.507	14.3591	1356	1277
6652	SORD	102.021	12.7147	0.924688	110.33	6.06856	102.873	11.7223	1357	2637
2864	FFAR1	102.015	3.51007	1.02408	99.6164	1.67245	90.5316	10.9101	1358	1486
64419	MTMR14	102.013	7.49589	1.00056	101.955	3.76934	87.8467	1.40347	1359	1726
51477	ISYNA1	102.011	7.26105	1.07227	95.1358	9.09743	121.997	6.31179	1360	1077
55230	USP40	102.011	6.67487	1.05296	96.8799	9.0366	67.565	10.7624	1361	1220
113691	MGC16703	102.009	13.4667	1.00631	101.37	6.90651	103.381	12.137	1362	1660
23129	PLXND1	102.004	4.7295	0.993637	102.657	10.3395	106.054	11.1178	1363	1800
2067	ERCC1	102.002	4.84701	0.942874	108.182	0.303118	107.505	14.2307	1364	2398
5337	PLD1	102.002	5.40029	1.07812	94.6107	5.0858	115.726	14.9533	1365	1033
8811	GALR2	101.994	1.31758	1.35532	75.2549	16.1852	44.3856	26.0118	1366	139
4708	NDUFB2	101.98	5.4607	0.941747	108.288	2.1009	101.807	15.9209	1367	2412
3678	ITGA5	101.972	6.14936	0.974443	104.646	11.6777	113.639	19.8048	1368	1987
84823	LMNB2	101.958	3.55174	1.08335	94.1128	10.5004	122.81	23.9185	1369	995
2806	GOT2	101.95	4.34459	1.02762	99.209	5.34951	61.1342	11.8511	1370	1451
64754	SMYD3	101.949	9.21837	0.855218	119.209	9.9918	85.6987	7.67588	1371	3527
10111	RAD50	101.948	5.03497	0.959794	106.219	1.61322	100.782	19.4775	1372	2177
1633	DCK	101.948	4.26194	0.936267	108.888	3.96131	94.8953	0.912641	1373	2486
79734	KCTD17	101.948	6.65232	1.34039	76.0581	33.9506	163.692	18.3163	1374	154
2915	GRM5	101.935	11.768	0.950527	107.241	0.571963	106.196	12.4646	1375	2309
440730	TRIM67	101.933	19.7684	1.14994	88.6427	8.55423	137.947	32.8433	1376	619
10942	PRSS21	101.933	4.46832	1.03124	98.845	8.42502	104.52	22.5726	1377	1415
377	ARF3	101.918	3.0505	1.05773	96.3555	6.95269	118.338	18.6507	1378	1182
1352	COX10	101.905	6.37098	0.961651	105.969	4.11616	103.815	11.0954	1379	2149
8645	KCNK5	101.9	5.31362	0.963025	105.813	6.22178	140.766	20.5373	1380	2123
55862	ECHDC1	101.897	7.53046	1.10378	92.3167	3.6692	136.029	30.1294	1381	847
57325	CSRP2BP	101.897	10.5206	0.956904	106.486	5.93338	80.2297	8.68763	1382	2216
154043	CNKSR3	101.893	9.95809	0.926823	109.938	4.87514	86.3041	9.73631	1383	2598
161725	OTUD7A	101.889	4.47232	0.980192	103.948	1.54536	116.1	2.7874	1384	1922
4193	MDM2	101.871	3.03081	0.972994	104.698	9.6356	88.7371	20.9002	1385	2008
9826	ARHGEF11	101.865	10.7603	1.11534	91.331	7.84345	142.086	20.3309	1386	777
5082	PDCL	101.854	5.73467	1.00825	101.02	5.23497	93.7635	11.9293	1387	1639
57097	PARP11	101.853	3.21172	1.01391	100.456	6.34374	87.0185	7.22675	1388	1581
84867	PTPN5	101.847	17.475	1.06457	95.6702	7.64946	133.702	41.6804	1389	1129
56141	PCDHA7	101.844	5.57576	0.931025	109.389	10.9892	87.7114	14.4248	1390	2543
26993	AKAP8L	101.826	4.42215	1.04828	97.1357	5.92369	100.947	15.4618	1391	1258
2779	GNAT1	101.815	1.39809	0.953601	106.769	4.15444	119.324	13.958	1392	2268
23433	RHOQ	101.81	6.63749	1.03058	98.789	8.99338	116.313	17.1349	1393	1421
2149	F2R	101.803	8.45388	1.07142	95.0161	10.1634	73.2594	9.20327	1394	1085
975	CD81	101.789	7.41397	0.951978	106.923	5.73898	102.217	23.8031	1395	2294
2899	GRIK3	101.783	3.26349	0.967383	105.215	6.73371	132.169	9.57265	1396	2072
57106	NAT14	101.774	5.67071	0.93848	108.446	2.82315	124.564	19.3459	1397	2458
53	ACP2	101.774	1.80914	0.955945	106.464	8.00629	97.8485	17.9247	1398	2231
6576	SLC25A1	101.769	10.8063	0.927612	109.71	4.71808	97.3685	26.7614	1399	2586
65264	UBE2Z	101.768	5.48804	1.35745	74.9703	9.07942	89.786	14.3771	1400	136
81844	TRIM56	101.747	4.95221	1.00725	101.015	5.7531	126.208	30.5587	1401	1650
5610	EIF2AK2	101.741	1.54572	1.09682	92.7605	6.59448	91.7605	2.88441	1402	884
139760	GPR119	101.721	1.7689	0.959833	105.978	2.33403	92.0516	20.4414	1403	2175
8795	TNFRSF10B	101.707	4.51018	1.01131	100.569	2.06649	94.0325	4.15989	1404	1604
199	AIF1	101.703	2.22337	1.00857	100.838	8.69212	94.5582	8.12614	1405	1635
3557	IL1RN	101.698	9.15957	0.903575	112.55	4.14232	107.368	16.4547	1406	2929
30011	SH3KBP1	101.69	35.4325	0.983701	103.375	4.80956	134.988	33.0018	1407	1888
587	BCAT2	101.688	5.97364	0.956398	106.324	22.8844	105.426	19.5405	1408	2223
6038	RNASE4	101.683	11.7785	0.958374	106.1	1.43057	102.546	6.75106	1409	2192
55964	SEPT3	101.674	4.66926	0.958567	106.069	10.5554	82.895	25.8827	1410	2190
7325	UBE2E2	101.659	9.96063	1.0123	100.424	2.00954	138.814	32.1473	1411	1594
64750	SMURF2	101.654	2.9645	0.950937	106.899	0.718808	96.3973	20.1672	1412	2302
32	ACACB	101.614	3.98546	1.00828	100.78	3.65696	106.67	11.2811	1413	1638
22950	SLC4A1AP	101.609	14.7729	1.01129	100.475	4.77568	122.985	10.721	1414	1606
81491	GPR63	101.601	3.32813	1.02311	99.3057	5.46989	103.422	22.5796	1415	1500
56474	CTPS2	101.581	7.11541	1.02346	99.2526	4.69726	102.188	14.9826	1416	1496
9670	IPO13	101.569	14.1415	1.21224	83.7859	16.5211	132.986	12.7048	1417	387
80351	TNKS2	101.566	7.82491	0.990597	102.53	7.99476	99.4216	19.1127	1418	1825
27235	COQ2	101.555	2.95662	1.03517	98.1047	4.92504	121.893	0.864723	1419	1375
51363	GALNAC4S-6ST	101.528	15.4161	1.1236	90.3598	4.76485	120.507	15.4411	1420	731
7322	UBE2D2	101.528	11.0487	1.00943	100.58	4.94309	116.228	28.5281	1421	1623
4851	NOTCH1	101.501	4.84586	1.01919	99.5904	1.62169	111.25	21.0529	1422	1535
1798	DPAGT1	101.494	14.3989	1.02127	99.3801	5.54399	91.2751	8.18028	1423	1523
3480	IGF1R	101.459	14.5798	0.93991	107.945	2.50927	74.8389	10.8174	1424	2435
24	ABCA4	101.425	8.29552	0.996409	101.791	4.45452	106.47	12.6389	1425	1766
27183	VPS4A	101.412	5.48942	1.02972	98.4846	2.21605	124.897	14.0672	1426	1431
9374	PPT2	101.407	7.73357	1.07903	93.98	4.93936	120.034	4.51152	1427	1027
23094	SIPA1L3	101.405	3.94287	0.964922	105.091	5.16514	97.5037	4.47093	1428	2103
51752	ERAP1	101.401	6.63581	0.952677	106.437	14.6018	81.3829	13.5156	1429	2277
51542	VPS54	101.392	3.0862	1.08369	93.5613	3.74007	115.347	11.3388	1430	991
53917	RAB24	101.383	11.3047	1.05187	96.3836	9.91622	127.11	8.73006	1431	1229
2979	GUCA1B	101.349	9.69179	1.08345	93.5434	3.27932	107.243	4.59942	1432	993
57093	TRIM49	101.331	6.35103	0.964746	105.034	3.84166	115.022	12.0536	1433	2106
28976	ACAD9	101.33	4.20794	1.01798	99.5404	6.37239	130.111	8.23435	1434	1548
58986	TMEM8	101.329	6.802	1.09219	92.7753	2.08677	108.467	11.5791	1435	921
6513	SLC2A1	101.316	3.49553	0.99641	101.681	5.09932	115.98	13.1258	1436	1765
25960	GPR124	101.306	5.05393	0.940871	107.672	8.73216	107.662	13.1606	1437	2422
23464	GCAT	101.303	8.03192	1.03375	97.9961	6.80418	118.341	29.1961	1438	1392
5414	SEPT4	101.296	1.79191	0.987008	102.63	1.7013	95.4269	12.9298	1439	1863
10463	SLC30A9	101.289	6.61686	1.03538	97.8274	1.56406	109.796	40.2993	1440	1372
5058	PAK1	101.288	3.28476	0.995969	101.698	3.71577	105.641	10.6165	1441	1769
50488	MINK1	101.28	10.0138	0.966809	104.757	6.44274	125.878	27.843	1442	2075
27010	TPK1	101.277	4.30189	0.971201	104.28	6.69818	102.736	4.1614	1443	2027
8694	DGAT1	101.275	5.28832	1.12939	89.6718	9.41974	113.302	19.0925	1444	701
9655	SOCS5	101.224	9.05785	0.966123	104.774	6.23393	105.428	23.0185	1445	2087
51010	EXOSC3	101.21	3.44453	1.00705	100.502	8.12519	152.63	51.2446	1446	1653
50615	IL21R	101.209	2.81713	1.07246	94.3711	6.52999	85.8472	18.5414	1447	1073
10020	GNE	101.199	0.755377	1.09599	92.3355	8.23774	107.106	20.3598	1448	889
8925	HERC1	101.182	2.45436	1.0031	100.869	4.7899	112.399	11.5726	1449	1708
347732	CATSPER3	101.169	0.380096	1.12656	89.8036	2.40596	96.4827	26.0298	1450	720
7016	TESK1	101.135	5.96331	1.03154	98.0424	3.96575	88.7831	3.24748	1451	1410
11154	AP4S1	101.133	13.5249	1.01142	99.9914	11.3057	94.7162	16.482	1452	1603
54760	PCSK4	101.13	4.82976	0.988137	102.344	14.1388	71.4368	6.86208	1453	1851
5709	PSMD3	101.122	1.0543	0.980672	103.115	2.555	127.508	18.2748	1454	1917
51548	SIRT6	101.115	7.87277	0.999096	101.206	3.84324	100.744	8.8034	1455	1741
55872	PBK	101.103	4.86251	1.01585	99.5253	5.42882	189.906	4.61017	1456	1565
311	ANXA11	101.099	3.60696	1.01367	99.7354	4.57874	102.705	8.91754	1457	1584
23007	PLCH1	101.099	2.33318	1.16988	86.418	6.38281	94.8926	15.8411	1458	528
9958	USP15	101.096	1.10553	1.00329	100.765	2.93147	114.241	11.1969	1459	1704
326	AIRE	101.088	15.9104						1460	9000
29992	PILRA	101.077	5.63142	1.07388	94.1233	11.2632	124.327	23.4183	1461	1063
128239	IQGAP3	101.064	17.3214	0.857851	117.811	11.8478	98.3367	12.8916	1462	3502
90701	SEC11C	101.061	6.26782	0.92225	109.581	4.98547	143.468	31.8969	1463	2672
25945	PVRL3	101.053	7.75167	0.889057	113.663	5.82579	91.5233	13.7731	1464	3108
2892	GRIA3	101.021	1.83806	1.03763	97.3572	3.39991	109.701	11.0603	1465	1354
114790	STK11IP	100.972	7.40482	0.99086	101.903	7.53032	90.3616	3.24462	1466	1823
546	ATRX	100.971	6.65406	1.00688	100.281	9.99407	96.7768	6.84348	1467	1655
51114	ZDHHC9	100.958	8.04085	1.22929	82.1269	1.70299	136.68	17.5147	1468	318
121268	RHEBL1	100.943	6.95437	0.900576	112.087	3.80015	108.083	33.4917	1469	2967
151056	PLB1	100.92	5.0807	0.900745	112.041	7.11782	112.727	11.3295	1470	2965
4774	NFIA	100.918	4.57487	1.11912	90.1761	3.45542	100.539	21.2298	1471	761
9690	UBE3C	100.917	12.1753	1.16211	86.8395	6.83487	110.238	20.1669	1472	557
8756	ADAM7	100.914	3.86466	0.973459	103.666	3.12252	93.2081	5.74483	1473	1999
10365	KLF2	100.909	7.3749	1.05685	95.4809	10.2557	87.2851	23.7339	1474	1191
10420	TESK2	100.906	8.06852	1.01752	99.1687	2.5009	102.195	18.5145	1475	1554
5692	PSMB4	100.904	3.13885	1.00547	100.355	4.43411	102.792	15.8863	1476	1669
4830	NME1	100.896	10.1914	1.048	96.2748	3.32874	128.344	18.5607	1477	1262
9879	DDX46	100.881	2.20773	0.957325	105.378	5.93955	105.449	21.4456	1478	2207
9546	APBA3	100.854	7.51961	1.18855	84.8543	9.88308	267.212	89.7065	1479	471
1737	DLAT	100.849	8.44773	0.956957	105.385	7.90067	130.847	23.192	1480	2213
25878	MXRA5	100.826	2.52207	1.03138	97.758	15.1409	103.691	21.6915	1481	1414
23	ABCF1	100.815	2.10804	1.07448	93.8266	7.67334	96.1022	13.171	1482	1057
3383	ICAM1	100.804	9.19298	0.90612	111.248	7.70901	84.7557	17.2979	1483	2886
26037	SIPA1L1	100.792	5.6331	1.02385	98.4438	9.65848	103.235	15.3608	1484	1488
51084	CRYL1	100.79	14.4586	1.28507	78.4319	13.5603	123.43	16.7104	1485	224
55114	ARHGAP17	100.78	3.93994	0.959859	104.995	7.98036	87.6028	16.9932	1486	2174
36	ACADSB	100.775	3.93238	1.04234	96.6815	4.18534	98.1178	14.4274	1487	1312
29796	UCRC	100.764	7.47566	1.15557	87.1982	2.58889	90.3867	24.4694	1488	586
9541	CIR	100.758	7.42797	0.967452	104.148	11.4675	107.162	10.2058	1489	2071
8837	CFLAR	100.756	11.9228	0.992353	101.533	5.71828	101.428	19.3721	1490	1811
8546	AP3B1	100.746	2.30916	0.978576	102.952	3.49577	160.059	37.5496	1491	1938
64841	GNPNAT1	100.74	15.1542	1.16554	86.4319	11.9205	122.635	29.9875	1492	545
5447	POR	100.729	6.21939	1.20257	83.7616	3.32226	115.81	13.6628	1493	416
9108	MTMR7	100.721	4.00534	0.94529	106.551	5.09091	110.977	17.3771	1494	2371
1780	DYNC1I1	100.712	5.93113	0.938803	107.277	2.63097	107.726	16.431	1495	2453
1408	CRY2	100.704	8.47982	1.00368	100.335	10.0681	49.4951	22.4896	1496	1701
5036	PA2G4	100.703	6.05339	0.970944	103.717	5.63016	95.8755	1.3497	1497	2030
117178	SSX2IP	100.693	3.62831	0.835363	120.537	17.5373	92.3549	13.1777	1498	3743
4200	ME2	100.692	13.3206	0.977204	103.041	4.30018	98.1113	13.4584	1499	1953
60678	EEFSEC	100.688	6.54059	1.20718	83.4073	2.57907	120.233	28.3865	1500	404
170692	ADAMTS18	100.677	4.83495	0.948744	106.116	14.0964	120.804	16.2545	1501	2329
8807	IL18RAP	100.676	7.9753	1.02354	98.3607	1.45923	108.201	18.4415	1502	1495
7516	XRCC2	100.664	1.9699	0.981877	102.522	8.19267	136.888	33.6082	1503	1907
6578	SLCO2A1	100.656	33.0655	0.942008	106.852	1.605	83.8955	21.3916	1504	2408
89858	SIGLEC12	100.642	11.069	0.995214	101.126	8.05761	77.6179	9.01269	1505	1783
5189	PEX1	100.642	9.38776	0.952312	105.682	6.13492	133.809	8.59961	1506	2283
8527	DGKD	100.64	2.34702	1.06561	94.4431	1.77225	103.572	2.31476	1507	1126
5921	RASA1	100.629	2.79028	0.93254	107.909	6.45967	116.839	5.98517	1508	2525
5791	PTPRE	100.628	7.07019	1.05744	95.1623	0.802697	109.075	15.4684	1509	1185
9736	USP34	100.623	6.20965	1.00742	99.8819	3.80415	98.4986	29.7693	1510	1646
7371	UCK2	100.617	4.02551	0.804272	125.103	3.17369	115.782	18.9746	1511	4076
9889	ZBED4	100.604	6.05903	0.952035	105.673	5.66417	121.647	25.583	1512	2291
10802	SEC24A	100.587	7.25302	0.980073	102.633	5.29578	92.972	13.062	1513	1926
6817	SULT1A1	100.586	12.4915	1.03807	96.8974	4.54563	88.1421	12.1623	1514	1348
28968	SLC6A16	100.581	4.95068	1.11018	90.5985	5.5477	95.6648	9.2408	1515	807
26061	HACL1	100.577	30.1927	1.00505	100.072	7.23705	104.112	11.0478	1516	1677
65061	PFTK2	100.571	3.73798	0.990642	101.521	2.67756	107.603	16.777	1517	1824
91179	SCARF2	100.562	11.5239	0.991554	101.419	2.9264	98.8376	14.6782	1518	1817
10392	NOD1	100.559	6.30565	1.09384	91.9317	1.04627	146.085	21.0581	1519	900
6536	SLC6A9	100.55	9.7101	0.976895	102.928	9.14682	87.0981	17.4652	1520	1956
7220	TRPC1	100.547	4.2453	1.01389	99.1701	5.32133	177.814	55.5377	1521	1582
10914	PAPOLA	100.544	5.39182	1.09246	92.0345	8.88624	94.6174	29.2023	1522	916
8706	B3GALNT1	100.542	5.68762	1.00796	99.7476	4.14474	101.107	13.4209	1523	1641
162417	NAGS	100.536	7.76033	0.941865	106.741	8.94845	85.4677	7.95372	1524	2409
55509	BATF3	100.499	14.0103	1.03854	96.7692	8.64334	94.2779	13.7624	1525	1342
5567	PRKACB	100.497	2.86338	0.962187	104.446	4.23471	106.542	1.56983	1526	2138
5306	PITPNA	100.483	13.6055	0.919686	109.258	8.19018	88.1794	5.68706	1527	2710
56255	TXNDC13	100.479	7.84864	0.996942	100.787	2.44702	132.195	18.4012	1528	1759
9150	CTDP1	100.476	14.069	0.897274	111.979	3.89344	96.3781	11.5618	1529	3011
29028	ATAD2	100.458	6.75027	0.996882	100.772	5.07675	97.6747	16.9056	1530	1760
6992	PPP1R11	100.453	5.19063	0.957127	104.953	8.75745	89.7982	10.9143	1531	2209
2329	FMO4	100.45	1.0398	1.14603	87.6502	20.4225	126.048	25.7934	1532	630
3386	ICAM4	100.446	2.55685	1.03934	96.6439	9.63381	119.411	15.1132	1533	1335
572	BAD	100.434	4.05744	1.00894	99.5449	3.82718	70.9216	38.5564	1534	1632
57584	ARHGAP21	100.424	10.0745	0.922491	108.862	6.3791	104.091	9.35393	1535	2666
8886	DDX18	100.418	18.2389	1.0616	94.5911	4.61001	113.813	15.5419	1536	1153
54941	RNF125	100.406	3.33827	1.00621	99.7862	2.04375	109.503	2.39392	1537	1661
51231	VRK3	100.403	1.39064	0.953921	105.253	2.34798	88.0257	1.29356	1538	2265
2356	FPGS	100.397	11.4598	1.03742	96.7758	4.22079	106.103	7.41799	1539	1356
147372	CCBE1	100.396	12.8514	0.968356	103.677	2.71821	83.2937	12.7674	1540	2066
57572	DOCK6	100.391	4.46593	1.08442	92.5762	1.11487	90.1962	5.45995	1541	988
51560	RAB6B	100.39	10.6885	0.962438	104.308	6.82766	99.6312	22.0595	1542	2135
5563	PRKAA2	100.383	7.76088	0.910798	110.215	6.34445	79.5176	8.68604	1543	2823
134147	CMBL	100.37	3.295	1.04285	96.2463	4.37022	111.131	15.9169	1544	1309
1295	COL8A1	100.363	2.75058	0.960486	104.491	1.79242	90.6544	22.2335	1545	2166
7372	UMPS	100.355	2.15871	1.08737	92.2916	11.2613	200.292	79.3244	1546	957
5604	MAP2K1	100.341	3.01679	1.0856	92.4292	8.48184	95.4779	11.1651	1547	975
152926	PPM1K	100.328	17.4455	1.20138	83.5106	6.79042	112.02	6.28384	1548	421
7916	BAT2	100.296	3.35978	1.00012	100.284	7.67849	107.25	13.9612	1549	1730
4659	PPP1R12A	100.271	22.137	0.920349	108.948	5.64795	93.3085	17.6852	1550	2701
2194	FASN	100.264	2.33292	1.18908	84.3207	10.9404	107.172	30.8909	1551	464
3692	EIF6	100.234	9.23763	0.893883	112.134	10.8079	166.542	19.3818	1552	3048
51440	HPCAL4	100.185	1.9941	0.994687	100.72	1.51301	89.2065	3.29104	1553	1789
22928	SEPHS2	100.17	3.62444	1.22592	81.7095	1.34989	121.79	8.70437	1554	331
3784	KCNQ1	100.167	3.73104	0.965479	103.749	6.51432	99.8556	16.728	1555	2098
83707	TRPT1	100.164	28.469	1.03415	96.8572	6.91107	105.488	12.0804	1556	1387
92106	OXNAD1	100.164	22.5828	0.928429	107.885	12.8838	104.175	8.40348	1557	2578
10121	ACTR1A	100.16	17.4636	1.05707	94.7529	7.75878	111.281	12.6105	1558	1188
64118	DUS1L	100.155	17.7087	0.918284	109.067	2.36984	85.4974	10.5956	1559	2736
135	ADORA2A	100.152	7.29153	0.953846	104.998	4.10485	73.2047	20.2371	1560	2266
8975	USP13	100.147	4.06394	0.96568	103.706	1.26603	83.9122	12.9404	1561	2094
9173	IL1RL1	100.14	7.87929	0.99648	100.494	3.57076	104.916	2.53303	1562	1764
7166	TPH1	100.139	5.30931	1.05924	94.5382	7.95837	165.793	45.6259	1563	1168
4281	MID1	100.139	4.10061	1.29202	77.5059	5.21141	131.757	29.9726	1564	216
392360	CTSL3	100.133	3.3004	0.980117	102.164	7.39633	103.924	22.7065	1565	1924
5733	PTGER3	100.126	8.96357	0.904094	110.748	4.73078	80.1054	10.6789	1566	2918
27304	MOCS3	100.125	1.74668	1.15507	86.6831	4.81678	319.296	60.1664	1567	590
4673	NAP1L1	100.122	6.27181	0.943475	106.12	0.600174	106.73	10.3062	1568	2391
51094	ADIPOR1	100.115	8.07703	1.05972	94.4729	8.57424	105.941	32.1087	1569	1162
9276	COPB2	100.11	8.0932	1.18816	84.2564	4.68074	591.887	311.689	1570	472
1756	DMD	100.083	4.60636	0.951185	105.22	1.51765	112.795	29.4545	1571	2301
118491	TTC18	100.082	11.1005	1.01049	99.0435	20.8114	96.5766	28.6656	1572	1613
51251	NT5C3	100.08	1.93604	1.03775	96.4399	7.13052	194.629	7.88992	1573	1351
152110	NEK10	100.054	4.30016	1.01407	98.6657	12.0012	95.1774	8.92702	1574	1579
23075	SWAP70	100.049	5.72403	0.93418	107.098	9.50733	103.15	27.2926	1575	2504
93663	ARHGAP18	100.043	7.34208	0.948408	105.485	8.03417	103.248	7.03798	1576	2331
5162	PDHB	100.04	3.98097	0.951394	105.151	7.94122	116.028	11.4372	1577	2299
28996	HIPK2	100.031	6.79249	1.02507	97.5844	5.57996	121.982	8.54586	1578	1472
6855	SYP	100.022	4.02345	0.993538	100.672	5.30624	90.5785	5.23993	1579	1801
84134	TOMM40L	100.018	3.86305	1.05963	94.3894	0.357143	90.4284	12.3202	1580	1164
4638	MYLK	100.012	3.22572	1.01257	98.7706	2.19124	106.1	11.7334	1581	1592
11221	DUSP10	100.011	6.18282	1.06611	93.8095	7.1451	106.164	12.1229	1582	1122
11275	KLHL2	100.008	2.16181	1.03009	97.0867	7.55337	99.2192	20.2498	1583	1425
5796	PTPRK	99.9887	9.93945	0.969024	103.185	5.07969	122.154	6.93114	1584	2057
80204	FBXO11	99.9532	19.4522	0.942292	106.075	12.6019	110.33	43.271	1585	2405
1508	CTSB	99.9485	5.56014	0.979747	102.015	6.0629	96.0775	14.2549	1586	1928
80310	PDGFD	99.9344	1.6655						1587	9000
5611	DNAJC3	99.9325	17.4873	1.01435	98.519	9.65903	121.746	19.0921	1588	1576
50640	PNPLA8	99.9268	4.39694	0.976305	102.352	4.45604	91.3986	15.0903	1589	1960
1347	COX7A2	99.9111	4.74146	1.04054	96.0182	6.44933	97.4737	5.63405	1590	1325
11127	KIF3A	99.9098	11.6118	0.977871	102.171	10.1249	92.1298	10.4204	1591	1944
5684	PSMA3	99.8988	2.86364	1.06306	93.9729	4.29144	105.644	11.2377	1592	1142
11043	MID2	99.8932	2.64472	1.11381	89.6858	13.3497	165.962	54.5063	1593	787
4131	MAP1B	99.8929	8.05297	0.89393	111.746	1.2401	104.9	8.05697	1594	3046
27077	B9D1	99.8926	8.2757	0.971282	102.846	6.35311	98.6346	22.7168	1595	2026
10279	PRSS16	99.8811	1.10187	1.00326	99.5567	3.46465	127.148	16.7668	1596	1706
9585	KIF20B	99.8794	9.614	0.919243	108.654	2.26936	105.158	19.7916	1597	2721
55636	CHD7	99.8661	5.29165	0.887429	112.534	6.14593	70.1797	12.0619	1598	3139
7297	TYK2	99.8305	2.75915	1.06021	94.1612	9.72503	110.201	10.7816	1599	1159
8556	CDC14A	99.83	7.58604	1.00931	98.909	8.56178	141.665	8.6768	1600	1628
1147	CHUK	99.8247	13.7434	0.995429	100.283	2.36611	110.578	7.74937	1601	1779
224	ALDH3A2	99.7969	8.84776	0.903532	110.452	11.6162	113.131	22.6077	1602	2931
5530	PPP3CA	99.7687	1.77191	0.957945	104.149	4.06892	79.7041	12.2399	1603	2201
26229	B3GAT3	99.7503	3.85728	1.02236	97.5689	2.10713	96.3121	9.74489	1604	1513
23708	GSPT2	99.746	5.75343	0.969837	102.848	12.6397	106.773	34.7487	1605	2046
53343	NUDT9	99.7429	5.68269	0.93036	107.209	1.62099	103.983	3.99195	1606	2557
4036	LRP2	99.7363	3.72581	0.98465	101.291	9.1602	95.3945	13.5266	1607	1880
64854	USP46	99.7309	7.58064	1.47419	67.6511	38.3546	156.901	48.4398	1608	71
64374	SIL1	99.7073	3.23734	0.998669	99.8402	9.53026	89.0901	3.66833	1609	1747
132949	AASDH	99.7022	7.76223	1.03302	96.515	2.89106	84.6774	20.3575	1610	1399
10278	EFS	99.6722	3.57031	0.939714	106.067	9.42708	118.515	21.5124	1611	2439
11316	COPE	99.6649	3.7421	1.67484	59.5073	21.6806	187.85	45.9362	1612	32
9334	B4GALT5	99.6521	4.07611	1.03019	96.7316	8.24688	143.054	11.2981	1613	1424
23417	MLYCD	99.6509	6.95419	0.968585	102.883	6.81821	110.274	11.8992	1614	2061
5338	PLD2	99.6507	11.3565	0.971044	102.622	0.581629	83.4779	7.5976	1615	2028
23590	PDSS1	99.6506	7.09814	0.943105	105.662	5.71428	135.098	3.49586	1616	2394
5590	PRKCZ	99.6402	17.677	0.975751	102.116	4.80115	92.4598	10.6816	1617	1966
64210	MMS19	99.6376	6.73184	0.891304	111.789	1.01162	78.9122	1.4407	1618	3081
7455	ZAN	99.6333	1.27433	1.04682	95.1771	4.72538	107.389	5.58821	1619	1273
5226	PGD	99.6281	10.9675	0.96374	103.377	9.28004	106.985	11.0779	1620	2116
5261	PHKG2	99.6279	8.63933	0.959136	103.873	1.43544	164.156	25.2905	1621	2181
4481	MSR1	99.6266	1.88375	0.961964	103.566	12.0514	105.916	12.3248	1622	2142
114908	TMEM123	99.6162	2.92027	0.982793	101.36	5.24343	98.1363	20.7448	1623	1896
5695	PSMB7	99.5941	6.64834	1.01751	97.8803	4.02559	101.964	14.7225	1624	1555
23098	SARM1	99.5898	5.45378	0.948887	104.954	0.930572	113.494	11.0861	1625	2325
3953	LEPR	99.5809	9.92226	0.928876	107.206	7.53219	135.245	4.30063	1626	2573
10423	CDIPT	99.5789	7.49685	1.02782	96.8836	3.02036	85.1889	6.76288	1627	1450
84669	USP32	99.5756	4.73814	0.908072	109.656	1.30426	111.887	11.9627	1628	2849
152330	CNTN4	99.5595	7.95417	0.977708	101.83	8.21156	107.352	10.1434	1629	1946
55218	EXDL2	99.5213	6.21728	1.04567	95.1748	5.50965	63.417	20.8821	1630	1287
8821	INPP4B	99.514	27.3249	1.18934	83.6716	15.8147	116.941	61.1821	1631	462
3857	KRT9	99.5029	6.54892	1.03474	96.1623	11.3843	106.237	18.9855	1632	1379
55159	RFWD3	99.5003	3.1878	0.963054	103.317	6.40337	93.3618	19.675	1633	2122
3568	IL5RA	99.4997	7.29719	0.938671	106.001	4.11709	88.1776	6.80779	1634	2455
79139	DERL1	99.493	9.66636	0.939055	105.95	6.91806	115.87	51.0183	1635	2447
649	BMP1	99.4882	6.7605	0.961531	103.469	1.64117	78.8952	17.3095	1636	2150
7424	VEGFC	99.4805	6.38008	0.977865	101.732	10.0133	97.9297	13.401	1637	1945
142940	TRUB1	99.4747	2.28632	0.940476	105.771	8.38996	162.884	47.7448	1638	2429
22853	LMTK2	99.4726	4.26906	0.961208	103.487	1.76802	111.229	29.2923	1639	2155
1728	NQO1	99.4681	2.72437	1.13689	87.4912	11.2973	149.755	38.6199	1640	677
5873	RAB27A	99.4679	9.77668	0.945014	105.256	3.51505	96.1633	14.8488	1641	2375
9101	USP8	99.4415	5.864	0.940855	105.693	2.76869	83.1204	14.6383	1642	2423
6634	SNRPD3	99.4203	5.7335	1.00162	99.2595	3.344	92.6026	12.8819	1643	1720
10507	SEMA4D	99.4155	10.5741	0.997755	99.6391	1.57564	102.774	19.7733	1644	1751
11005	SPINK5	99.4095	3.63802	1.0677	93.1059	6.96301	119.636	3.38627	1645	1106
5522	PPP2R2C	99.3997	2.82693	0.981817	101.241	2.62323	110.981	18.1781	1646	1908
10188	TNK2	99.39	4.72129	1.08553	91.5593	8.09527	109.116	13.0621	1647	976
81544	GDPD5	99.3892	5.73065						1648	9000
85363	TRIM5	99.3764	5.86121	1.04361	95.2238	13.3652	84.4502	18.1163	1649	1303
23416	KCNH3	99.3681	0.904588	0.966264	102.837	10.4153	109.551	8.22981	1650	2084
59272	ACE2	99.3266	8.11726	1.00953	98.3891	3.92483	78.8661	17.4917	1651	1621
23457	ABCB9	99.3214	3.50529	0.99392	99.929	0.814785	102.247	6.85232	1652	1797
10139	ARFRP1	99.3047	4.41345	0.954669	104.02	4.43792	95.6982	3.74858	1653	2257
79658	ARHGAP10	99.2963	4.71407	0.972995	102.052	4.58235	103.198	22.8888	1654	2007
55515	ACCN4	99.2749	6.28655	1.04389	95.1013	3.8452	106.091	21.685	1655	1300
25932	CLIC4	99.2317	5.20759	0.949475	104.512	11.5565	160.997	19.7681	1656	2318
11122	PTPRT	99.2315	3.17116	0.960895	103.27	3.72175	130.491	24.4856	1657	2158
11093	ADAMTS13	99.2313	3.69698	0.945537	104.947	5.44047	107.189	14.4118	1658	2368
284252	KCTD1	99.2272	7.86158	1.20957	82.0351	2.2312	130.97	34.3716	1659	395
10424	PGRMC2	99.1834	7.65841	1.00782	98.4135	5.55774	108.041	20.4333	1660	1643
321	APBA2	99.1787	4.95359	0.961252	103.177	2.67243	119.129	17.5752	1661	2153
54677	CROT	99.1786	4.87741	0.908175	109.207	3.79141	92.5976	6.31863	1662	2847
41	ACCN2	99.1708	4.41405	1.01265	97.9316	7.52169	94.2947	13.6426	1663	1591
80271	ITPKC	99.1603	4.82038	0.943077	105.146	5.07881	100.446	14.3264	1664	2395
54910	SEMA4C	99.14	1.60451	0.952253	104.111	3.80371	106.484	18.1529	1665	2288
7378	UPP1	99.1397	4.38074	0.917429	108.062	7.08433	118.88	10.912	1666	2745
5902	RANBP1	99.1342	20.0785	0.957068	103.581	2.82065	113.539	19.979	1667	2212
8288	EPX	99.1309	4.8976	1.03465	95.8113	7.43846	109.625	11.2529	1668	1381
147409	DSG4	99.1172	3.04392	0.887445	111.688	5.60496	113.718	8.61994	1669	3137
57194	ATP10A	99.1136	4.98583	1.02682	96.525	14.5328	127.237	16.7186	1670	1460
63929	XPNPEP3	99.1079	20.8409	0.940695	105.356	5.8256	100.02	16.264	1671	2425
57048	PLSCR3	99.1069	9.56252	0.995274	99.5776	2.32356	87.9545	26.5605	1672	1782
873	CBR1	99.1033	17.1525	1.10122	89.9938	22.0352	132.472	24.9019	1673	863
9185	REPS2	99.0962	25.6652	1.03799	95.4696	4.26375	118.671	20.9011	1674	1350
29072	SETD2	99.0955	7.93005	0.96915	102.25	4.13759	112.439	1.06745	1675	2056
23428	SLC7A8	99.0932	1.25086	1.02189	96.971	4.31651	121.168	18.4944	1676	1515
203074	UNQ9391	99.0932	9.96344	0.945428	104.813	2.96159	101.938	26.4708	1677	2370
55968	NSFL1C	99.0878	4.14901	0.98908	100.182	4.01368	99.8324	5.49069	1678	1837
4287	ATXN3	99.0853	4.82195	0.922488	107.411	5.43185	143.803	19.5907	1679	2667
2804	GOLGB1	99.0847	7.09933	0.963973	102.788	3.30225	80.8276	21.8984	1680	2114
53938	PPIL3	99.0808	18.4473	0.937081	105.733	5.06094	113.215	17.3349	1681	2476
27044	SND1	99.0735	8.11077	0.954859	103.757	5.60928	100.38	19.2278	1682	2253
998	CDC42	99.0724	4.08976	0.982445	100.843	9.83269	174.001	12.8645	1683	1899
23171	GPD1L	99.0667	5.95177	1.03339	95.8661	2.40605	115.554	18.3742	1684	1396
23275	POFUT2	99.0386	9.72321	1.04602	94.6815	7.42199	128.21	39.2446	1685	1284
4661	MYT1	99.0364	5.43694	0.923924	107.191	6.09184	106.6	22.2069	1686	2645
83693	HSDL1	99.0353	3.76487	1.02174	96.9283	1.04746	101.64	25.5443	1687	1520
9252	RPS6KA5	98.9983	2.43353	0.995449	99.4508	3.6011	107.544	20.2312	1688	1776
56923	NMUR2	98.99	11.8911	0.958575	103.268	2.33104	89.1211	8.16711	1689	2189
8841	HDAC3	98.9865	4.8328	1.1972	82.6817	8.04134	134.998	23.4507	1690	437
5067	CNTN3	98.9858	2.8737	1.15507	85.697	7.41164	86.0197	21.2529	1691	591
29128	UHRF1	98.9725	6.27633	0.893276	110.797	3.22468	102.025	9.29751	1692	3056
10636	RGS14	98.9645	4.92985	1.0173	97.2813	1.90356	182.353	9.1238	1693	1558
445	ASS1	98.962	4.02392	0.997459	99.2141	0.790119	124.146	35.5667	1694	1754
9830	TRIM14	98.9542	10.0007	0.94867	104.308	4.73457	96.8445	18.6831	1695	2330
23515	MORC3	98.9402	4.09166	0.948006	104.367	6.08638	106.253	19.0663	1696	2335
260425	MAGI3	98.9348	9.06254	0.943148	104.898	4.22268	90.6605	13.667	1697	2393
22905	EPN2	98.9182	1.68941	0.926443	106.772	7.96729	99.4034	10.6714	1698	2605
8927	BSN	98.9014	6.33935	0.960122	103.009	5.02673	109.734	12.7449	1699	2170
57799	RAB40C	98.8977	3.86078	1.12894	87.6022	8.09283	94.7783	20.4801	1700	706
54995	OXSM	98.8958	7.06418	1.03161	95.8658	4.05091	83.6001	18.5429	1701	1409
7349	UCN	98.8809	19.5961	1.10724	89.3037	2.63018	164.735	36.0314	1702	827
25865	PRKD2	98.8391	3.12516	0.915993	107.904	4.86196	100.813	15.9585	1703	2767
3751	KCND2	98.8321	2.72895	0.953341	103.669	11.9916	77.0408	19.301	1704	2269
55137	FIGN	98.8203	4.3773	0.945901	104.472	3.22765	99.4114	23.4477	1705	2362
84988	PPP1R16A	98.8172	13.9983	0.915276	107.964	0.682929	113.337	15.1538	1706	2775
3454	IFNAR1	98.8169	6.74502	1.10088	89.7619	1.32115	189.829	54.349	1707	866
9678	PHF14	98.8152	8.42537	0.819528	120.576	29.2506	91.9848	3.75489	1708	3924
5810	RAD1	98.815	3.7612	1.05171	93.9561	2.77775	98.7656	14.9427	1709	1230
4282	MIF	98.8076	7.63181	1.30493	75.7186	13.8014	130.964	25.2276	1710	193
25830	SULT4A1	98.8057	7.32153	1.00506	98.308	3.70625	74.7774	15.6594	1711	1676
83539	CHST9	98.8032	6.57304	0.991598	99.6404	7.05356	109.145	3.33883	1712	1815
6799	SULT1A2	98.8006	3.42122	1.00151	98.6518	8.84984	82.8949	4.07067	1713	1723
8681	JMJD7-PLA2G4B	98.7962	3.96994	0.961236	102.78	2.90311	145.434	10.7615	1714	2154
10312	TCIRG1	98.7942	1.85682	1.22393	80.7186	33.8676	119.05	32.6741	1715	341
57679	ALS2	98.7788	4.76397	0.966438	102.209	6.11004	108.146	4.40421	1716	2080
200734	SPRED2	98.7527	7.0297	1.04625	94.3869	3.28644	110.324	19.4338	1717	1279
4958	OMD	98.7449	4.33851	1.05032	94.0145	8.18919	83.8339	18.1224	1718	1245
23012	STK38L	98.7383	13.4691	0.961448	102.698	5.86574	111.031	15.6167	1719	2151
132158	GLYCTK	98.7378	7.91483	0.970779	101.71	1.77303	93.9956	9.34364	1720	2031
284439	SLC25A42	98.7318	3.20635	0.969519	101.836	5.57696	92.3699	9.97048	1721	2049
498	ATP5A1	98.7282	4.52142	0.929888	106.172	4.83917	124.413	24.1904	1722	2562
9397	NMT2	98.7229	5.77666	0.945147	104.452	4.93929	84.421	21.421	1723	2373
273	AMPH	98.7166	8.72119	1.07893	91.4948	5.92939	133.667	20.6287	1724	1028
9807	IHPK1	98.7108	9.51172	0.953818	103.49	6.29145	89.1742	6.60406	1725	2267
2992	GYG1	98.695	7.6212	1.12681	87.5876	5.96853	100.086	21.7742	1726	718
6195	RPS6KA1	98.6718	7.78905	1.00854	97.8363	6.26352	101.661	22.5434	1727	1636
54676	GTPBP2	98.6706	5.99286	0.897538	109.935	3.68542	100.318	18.2169	1728	3008
1774	DNASE1L1	98.6682	3.16125	0.884042	111.61	5.76173	98.5548	7.71855	1729	3175
39	ACAT2	98.6666	5.29451	0.93892	105.085	1.46364	115.484	16.4845	1730	2452
115286	SLC25A26	98.6517	3.36492	0.879866	112.121	7.24315	98.5985	23.763	1731	3227
148327	CREB3L4	98.6468	5.37896	1.02812	95.9485	6.15352	188.722	18.445	1732	1448
91694	LONRF1	98.642	7.19392	1.01768	96.9282	3.56182	124.303	16.2395	1733	1550
92211	PCDH21	98.6239	10.008	0.945969	104.257	2.7729	87.5439	27.5765	1734	2358
4267	CD99	98.6207	2.59782	1.05845	93.1743	6.1218	133.5	27.1138	1735	1173
130013	ACMSD	98.6127	11.5473	0.873573	112.884	8.13236	119.924	33.8381	1736	3303
80196	RNF34	98.6075	2.22917	1.04646	94.2297	5.6514	126.425	38.1754	1737	1276
205564	SENP5	98.5969	7.59003	0.924307	106.671	3.92478	109.954	15.801	1738	2643
5777	PTPN6	98.5963	5.30779	0.950544	103.726	8.85469	116.609	7.20041	1739	2308
7174	TPP2	98.594	6.9531	1.02899	95.816	4.84243	138.092	12.9342	1740	1441
51082	POLR1D	98.5688	5.31561	0.989467	99.6181	5.29011	113.829	5.59457	1741	1832
10493	VAT1	98.5661	14.9836	0.974483	101.147	5.94499	119.343	3.75377	1742	1985
10087	COL4A3BP	98.5509	1.31306	0.986158	99.9342	3.67804	107.036	12.7295	1743	1868
8555	CDC14B	98.5285	7.75187	1.02125	96.478	7.65779	118.326	15.833	1744	1524
51366	UBR5	98.5195	4.56671	0.972051	101.352	13.0277	113.929	11.7233	1745	2014
9615	GDA	98.4666	1.79762	0.794741	123.898	8.48956	88.3783	11.3349	1746	4161
7059	THBS3	98.4608	3.6206	1.12299	87.6775	2.3937	109.673	10.4404	1747	734
3251	HPRT1	98.4585	15.366	0.966227	101.9	5.60235	127.34	27.3458	1748	2085
60485	SAV1	98.4501	3.58507	1.00389	98.0685	1.45749	115.433	16.6648	1749	1695
8540	AGPS	98.446	4.66766	0.952743	103.329	3.89651	79.7301	8.60095	1750	2276
10953	TOMM34	98.4157	6.1696	1.00225	98.195	7.06583	113.485	18.9356	1751	1714
55582	KIF27	98.414	9.72457	0.939603	104.74	3.50089	77.3343	9.14963	1752	2441
7357	UGCG	98.4002	5.79691	0.968391	101.612	4.72177	146.788	11.5789	1753	2064
54793	KCTD9	98.394	6.59296	0.932179	105.553	7.54369	117.187	14.8815	1754	2529
5660	PSAP	98.3844	6.31136	0.942419	104.396	3.60472	114.027	20.412	1755	2404
6890	TAP1	98.3844	2.98699	1.03616	94.9513	9.62396	123.227	16.6283	1756	1365
29904	EEF2K	98.3781	4.75629	0.90951	108.166	7.47964	92.6985	7.33006	1757	2832
3799	KIF5B	98.3779	2.55099	0.939809	104.679	1.19487	99.4226	18.3498	1758	2436
2693	GHSR	98.3732	13.6999	0.944913	104.108	11.0274	100.523	17.1608	1759	2377
2621	GAS6	98.3726	9.93565	1.01001	97.3977	7.92666	106.867	30.4115	1760	1617
9249	DHRS3	98.3725	5.09192	1.00429	97.9519	4.57725	123.041	41.4182	1761	1689
9742	IFT140	98.3691	4.24693	1.05622	93.1335	4.33498	115.245	19.6251	1762	1194
51088	KLHL5	98.3656	12.2999	1.1431	86.0518	6.36901	86.9481	10.0805	1763	645
27131	SNX5	98.3633	8.73892	0.996017	98.7567	5.1942	119.512	4.3968	1764	1768
10595	ERN2	98.358	1.51759	0.926004	106.218	7.24198	93.783	11.9005	1765	2616
5789	PTPRD	98.3579	4.49919	0.984072	99.9499	7.82174	108.74	21.8443	1766	1884
5803	PTPRZ1	98.3461	4.56259	1.01175	97.2038	4.58363	115.484	6.65138	1767	1600
5793	PTPRG	98.3407	6.07192	0.997731	98.5643	3.3808	99.7387	15.0385	1768	1753
6641	SNTB1	98.3336	11.0912	1.00939	97.419	3.41824	111.664	26.6645	1769	1625
3309	HSPA5	98.3312	7.94263	0.931132	105.604	12.2421	98.8225	13.7182	1770	2542
57402	S100A14	98.3127	26.3509	1.08663	90.4747	6.09641	176.848	70.0645	1771	967
23677	SH3BP4	98.307	3.132	0.930544	105.645	1.6899	98.2188	13.0648	1772	2552
80055	PGAP1	98.305	1.73052	0.989002	99.3981	4.29653	111.585	7.89024	1773	1839
1892	ECHS1	98.3034	5.10757	0.886145	110.934	6.32075	127.137	6.29162	1774	3153
84817	TXNDC17	98.3017	8.77893	1.02397	96.0009	6.16788	92.8145	4.90727	1775	1487
3094	HINT1	98.2974	2.32344	0.928638	105.851	5.8418	90.3035	6.65889	1776	2577
23209	MLC1	98.2944	0.941081	1.09206	90.008	6.44182	97.1806	24.2062	1777	922
51635	DHRS7	98.2933	7.84833	1.05103	93.5214	12.4834	109.536	19.9174	1778	1239
79723	SUV39H2	98.2923	7.41228	1.04117	94.4054	7.26714	106.592	18.3264	1779	1322
23373	CRTC1	98.2743	11.5025	0.878397	111.879	11.6369	95.6098	19.4152	1780	3245
4803	NGF	98.2741	5.53168	1.03523	94.9302	1.82459	100.378	6.40272	1781	1374
147015	DHRS13	98.2705	11.1186	0.96472	101.864	5.13076	116.735	20.4848	1782	2107
9869	SETDB1	98.263	6.66183	0.944169	104.074	0.78435	101.72	7.82186	1783	2385
4987	OPRL1	98.2604	13.0444	0.864481	113.664	8.23575	87.2739	13.6192	1784	3429
24140	FTSJ1	98.2308	5.40401	1.05942	92.7211	7.5884	89.0087	17.0857	1785	1166
553115	PEF1	98.2291	12.3806	0.904032	108.657	2.25124	86.1844	5.9086	1786	2921
7552	ZNF711	98.2247	3.67326	0.972125	101.041	5.9814	143.731	25.7456	1787	2013
9533	POLR1C	98.2098	0.146853	0.806253	121.81	11.1991	108.371	22.5576	1788	4056
23064	SETX	98.1912	4.12392	0.917062	107.071	5.23714	110.999	7.10439	1789	2749
57412	AS3MT	98.185	3.88137	0.989944	99.1824	3.27517	80.1834	9.48721	1790	1828
23398	PPWD1	98.1838	4.48599	0.941503	104.284	6.75571	99.2607	8.76916	1791	2414
29800	ZDHHC1	98.1788	3.2273	1.05894	92.7138	4.46689	142.954	6.61886	1792	1171
10519	CIB1	98.1739	4.36947	0.914382	107.366	10.0871	107.612	23.1818	1793	2791
5496	PPM1G	98.1668	6.41963	0.985103	99.6513	2.74784	100.112	22.5737	1794	1877
9833	MELK	98.1629	9.69158	1.0151	96.7024	4.52293	103.084	18.3782	1795	1569
6389	SDHA	98.1602	2.68496	1.29464	75.8202	22.7184	129.184	18.6737	1796	203
4758	NEU1	98.1597	5.07933	0.802914	122.254	12.4588	92.0838	19.9338	1797	4092
51704	GPRC5B	98.15	4.65252	0.920809	106.591	9.63989	128.412	29.0254	1798	2696
1407	CRY1	98.1444	4.03568	0.941221	104.274	4.47757	103.952	3.45342	1799	2418
55207	ARL8B	98.1284	14.2722	1.03404	94.8977	1.52101	113.608	10.8453	1800	1388
1490	CTGF	98.1245	4.13476	0.986283	99.4892	4.79206	93.7452	7.60943	1801	1867
11216	AKAP10	98.115	15.0029	0.887405	110.564	3.35823	87.5503	5.58641	1802	3140
4507	MTAP	98.1138	7.29565	1.01432	96.7289	3.55649	92.8499	12.0935	1803	1577
205	AK3L1	98.1106	6.50198	0.925915	105.961	4.99761	105.778	6.64679	1804	2618
81889	FAHD1	98.1071	4.491	1.35237	72.5447	37.8748	169.635	68.4059	1805	143
3108	HLA-DMA	98.1042	9.84328	0.9705	101.086	4.22792	87.6525	9.82081	1806	2036
8844	KSR1	98.0965	5.31493	0.909145	107.9	3.15158	89.6964	1.33026	1807	2839
4325	MMP16	98.0875	5.43918	0.927354	105.771	7.35522	96.296	5.24267	1808	2592
3673	ITGA2	98.0874	9.19258	1.00461	97.6371	0.395647	134.664	16.9787	1809	1684
476	ATP1A1	98.0686	3.12372	0.971957	100.898	4.50453	90.5253	10.2981	1810	2016
6860	SYT4	98.0651	6.82124	0.922884	106.259	7.55735	161.151	12.9595	1811	2660
54861	SNRK	98.0639	6.70714	0.979061	100.161	2.41409	110.356	16.7663	1812	1934
4677	NARS	98.0549	1.44106	0.991673	98.8783	10.9173	116.314	10.2564	1813	1814
5327	PLAT	98.0518	8.78787	0.960457	102.089	4.61972	122.257	29.2427	1814	2167
3837	KPNB1	98.0434	8.20535	1.11934	87.5907	13.5194	239.764	24.5998	1815	759
5774	PTPN3	98.0187	4.0561	1.00985	97.063	2.03463	110.649	19.281	1816	1619
5277	PIGA	98.0089	6.34512	0.95885	102.215	5.51329	126.187	12.4138	1817	2185
84263	HSDL2	98.0074	6.06562	0.925849	105.857	4.22126	85.9069	17.1082	1818	2621
393	ARHGAP4	98.0067	13.8229	1.15224	85.0574	11.8157	121.902	31.1984	1819	607
1176	AP3S1	98.006	9.2193	0.970484	100.987	15.2261	95.9161	26.0034	1820	2037
1978	EIF4EBP1	97.9937	3.30324	0.849282	115.384	2.30569	110.992	18.4455	1821	3598
166	AES	97.9884	11.0539	0.904017	108.392	12.9169	102.598	18.3952	1822	2923
7791	ZYX	97.9791	6.2094	1.08952	89.9288	6.83018	117.283	19.773	1823	941
1051	CEBPB	97.9718	2.99254	0.922766	106.172	7.87692	127.299	30.7371	1824	2663
648	BMI1	97.9402	5.21499	1.02561	95.4947	7.6927	158.597	45.3935	1825	1468
2222	FDFT1	97.9238	3.37848	1.14837	85.2721	13.7744	119.348	29.0591	1826	623
226	ALDOA	97.9209	9.0338	0.92591	105.756	8.93456	107.578	15.5406	1827	2619
1848	DUSP6	97.9177	2.08113	0.926435	105.693	2.25655	89.7281	15.0754	1828	2606
1308	COL17A1	97.907	11.7328	1.02244	95.7581	7.17913	113.119	2.8348	1829	1512
6713	SQLE	97.8985	3.16508	0.973755	100.537	5.14384	107.916	11.5552	1830	1996
3732	CD82	97.8968	8.79164	0.912281	107.31	5.70213	148.279	9.39448	1831	2808
5290	PIK3CA	97.8922	1.78029	0.963391	101.612	4.36524	107.137	13.3347	1832	2119
373	TRIM23	97.8851	5.30637	1.12895	86.7047	10.3394	87.6738	16.2992	1833	705
5985	RFC5	97.8821	5.53067	0.962764	101.668	10.3993	110.438	28.2285	1834	2127
160428	ALDH1L2	97.8649	5.43463	0.880163	111.19	10.7432	105.924	32.4363	1835	3219
5576	PRKAR2A	97.856	3.98814	0.977341	100.125	6.49403	122.722	9.89422	1836	1951
55356	SLC22A15	97.8445	5.05067	0.906305	107.96	8.98847	77.7194	7.31132	1837	2882
90957	DHX57	97.8292	6.649	0.973487	100.494	7.52541	88.4086	18.0927	1838	1998
54707	GPN2	97.8243	16.7105	0.896448	109.124	10.3212	132.139	31.3367	1839	3018
5967	REG1A	97.8084	4.84642	1.01013	96.8277	7.78051	101.035	16.0427	1840	1614
79661	NEIL1	97.8035	1.23787	1.03763	94.2564	6.07503	108.772	16.753	1841	1355
56848	SPHK2	97.8021	8.75074	1.06644	91.7091	8.13246	120.234	11.8769	1842	1119
51321	AMZ2	97.7979	10.1416	1.12728	86.7554	5.53708	179.066	21.7758	1843	713
23560	GTPBP4	97.7814	7.1049	0.917337	106.593	4.2652	96.0613	16.0943	1844	2747
51360	MBTPS2	97.7739	4.55081	0.907282	107.766	11.252	85.8514	15.2735	1845	2865
1495	CTNNA1	97.7668	7.73594	1.04046	93.9651	9.00421	199.765	54.5222	1846	1329
22900	CARD8	97.7654	3.8469	1.21937	80.1769	12.85	111.131	35.2835	1847	353
4067	LYN	97.7593	8.6627	1.01199	96.601	4.34693	96.3838	10.313	1848	1598
26007	DAK	97.7549	0.609353	0.952126	102.67	1.30467	118.198	18.9084	1849	2289
10123	ARL4C	97.7383	3.06891	1.02087	95.7398	3.17479	110.874	11.973	1850	1526
10855	HPSE	97.7374	5.28762	1.29148	75.6787	27.1983	145.725	33.1296	1851	217
3728	JUP	97.7364	20.0871	1.50584	64.905	8.02391	192.83	50.9843	1852	57
8324	FZD7	97.7359	6.56469	0.874616	111.747	13.8478	90.0616	9.01993	1853	3291
5331	PLCB3	97.7256	13.2803	1.36409	71.6414	4.67536	122.084	17.6643	1854	131
399512	SLC25A35	97.724	6.28073	0.971345	100.607	1.5464	115.034	17.2674	1855	2023
7786	MAP3K12	97.7219	3.68147	0.901681	108.377	4.60388	77.0393	8.90963	1856	2954
26230	TIAM2	97.7186	1.90533	1.03806	94.1359	6.43572	95.1379	11.9052	1857	1349
400	ARL1	97.7184	4.57716	0.905883	107.871	11.2259	63.0823	1.89707	1858	2890
10254	STAM2	97.7167	5.37947	1.08088	90.4047	2.83976	119.307	17.8454	1859	1008
8883	NAE1	97.7151	3.55322	0.97317	100.409	7.10191	96.9166	2.27732	1860	2003
10207	INADL	97.6975	12.4814	1.0115	96.587	7.31783	93.7679	3.87284	1861	1602
7077	TIMP2	97.657	13.2833	0.926325	105.424	13.5583	87.1324	7.11978	1862	2608
440435	GPR179	97.6529	4.12374	0.900188	108.481	8.96737	78.3258	10.5688	1863	2973
80024	SLC24A6	97.6527	6.27319	1.12734	86.6219	11.5523	124.901	22.054	1864	712
6675	UAP1	97.6422	16.1307	1.1373	85.8547	5.91532	90.7437	9.36914	1865	673
5598	MAPK7	97.6348	3.36264	1.10801	88.1176	3.50055	93.2743	16.7636	1866	824
3359	HTR3A	97.6073	4.93052	1.00395	97.2232	11.3009	93.187	6.54144	1867	1694
3797	KIF3C	97.5999	5.98383	0.985483	99.0376	14.8473	80.3438	9.02533	1868	1875
27292	DIMT1L	97.577	7.1343	0.988917	98.6706	5.60356	124.571	27.473	1869	1840
25976	TIPARP	97.576	4.45427	0.907864	107.479	1.33882	96.7481	11.4596	1870	2855
6885	MAP3K7	97.5617	3.45222	0.947366	102.982	0.794269	100.172	25.7401	1871	2342
126328	NDUFA11	97.555	11.1871	0.923685	105.615	4.11623	61.0671	9.09858	1872	2648
81602	CDADC1	97.548	2.95335	0.939679	103.81	8.78152	121.608	14.0806	1873	2440
114823	LENG8	97.5185	3.01342	0.999866	97.5315	3.24305	137.896	49.775	1874	1735
90627	STARD13	97.5181	3.75587	0.949403	102.715	0.90681	97.3504	18.4931	1875	2319
249	ALPL	97.5172	2.14885	0.902937	108	3.36706	104.295	4.74564	1876	2940
9371	KIF3B	97.5022	6.56545	1.03357	94.3349	3.76883	134.327	20.6753	1877	1393
3897	L1CAM	97.5007	3.94419	0.923159	105.616	4.37181	110.328	11.5562	1878	2654
23767	FLRT3	97.4938	1.88806	1.00713	96.8035	0.250497	80.5304	15.467	1879	1651
8836	GGH	97.4802	12.1328	0.902931	107.96	3.65923	92.3108	5.70302	1880	2941
4534	MTM1	97.4697	28.926						1881	9000
53827	FXYD5	97.469	7.78576						1882	9000
143098	MPP7	97.4642	5.71828	0.971312	100.343	3.67278	65.0497	7.56897	1883	2024
4739	NEDD9	97.4555	6.22019	1.21694	80.0823	17.316	119.781	14.5072	1884	371
126393	HSPB6	97.4509	1.5299	0.921574	105.744	6.92793	123.169	5.91638	1885	2683
11104	KATNA1	97.4443	3.67532	0.877796	111.01	2.99662	102.269	5.82638	1886	3250
57505	AARS2	97.4356	8.07008	0.970082	100.441	3.4934	87.3842	18.5312	1887	2043
84676	TRIM63	97.4335	6.3772	1.04279	93.4359	4.45521	116.827	18.7766	1888	1311
5864	RAB3A	97.4277	4.74945	0.909468	107.126	4.77051	99.3243	12.5222	1889	2833
9044	BTAF1	97.424	9.81328	1.0922	89.1997	12.1887	111.393	19.9301	1890	920
5892	RAD51L3	97.4209	3.40119	1.00437	96.9967	5.31551	132.519	26.505	1891	1686
22933	SIRT2	97.4203	5.98754	1.17778	82.7153	3.78324	152.295	48.7795	1892	507
1024	CDK8	97.4075	5.76474	0.916111	106.327	4.58948	93.1045	19.1049	1893	2764
27338	UBE2S	97.3918	2.33881	0.996802	97.7043	5.14659	142.416	15.6389	1894	1761
9212	AURKB	97.3902	5.33898	1.05277	92.5085	9.99017	131.371	6.02751	1895	1221
64579	NDST4	97.3896	1.70597	0.901243	108.061	2.94423	101.807	5.50597	1896	2961
23759	PPIL2	97.3808	6.43329	0.931669	104.523	10.665	96.0761	6.52588	1897	2536
284	ANGPT1	97.3801	9.11248	0.954774	101.993	4.9794	108.9	12.2539	1898	2255
2731	GLDC	97.3692	2.6021	0.972681	100.104	7.73218	89.6338	27.1298	1899	2009
5606	MAP2K3	97.3441	7.04176	1.00614	96.75	8.02676	100.792	17.0097	1900	1662
8323	FZD6	97.3129	11.8342	0.933035	104.297	4.4332	100.822	13.6386	1901	2516
257364	SNX33	97.3063	3.5347	1.17118	83.0839	5.49727	110.448	15.4583	1902	521
29775	CARD10	97.3054	4.01009	1.08156	89.9674	12.6897	118.214	5.85856	1903	1004
23509	POFUT1	97.2919	2.48839	0.94674	102.765	5.56114	99.5356	6.99035	1904	2350
708	C1QBP	97.2889	4.49422	0.979684	99.3064	3.23533	103.3	8.56697	1905	1930
83933	HDAC10	97.2796	5.35393	0.877714	110.833	1.15434	109.943	6.28279	1906	3251
1796	DOK1	97.2652	9.83997	0.968393	100.44	8.15648	115.488	18.4263	1907	2063
9748	SLK	97.2512	5.86815	1.0867	89.4923	7.11223	105.067	16.6401	1908	966
6477	SIAH1	97.2468	4.43327	0.999806	97.2657	3.01753	144.951	11.5632	1909	1736
2030	SLC29A1	97.2448	7.26328	0.912132	106.613	13.6792	92.688	7.62467	1910	2809
11240	PADI2	97.2327	11.0876	1.02382	94.9707	3.08829	109.011	32.4117	1911	1489
6284	S100A13	97.2257	4.39626	1.04502	93.0374	7.79177	131.347	25.1282	1912	1292
9891	NUAK1	97.2147	7.93116	0.99871	97.3403	6.50795	97.1526	3.38495	1913	1746
27068	PPA2	97.2127	9.8793	0.940636	103.348	3.32848	93.5117	4.92012	1914	2427
5663	PSEN1	97.2127	18.238	0.948358	102.506	6.83798	92.9871	1.41458	1915	2332
9217	VAPB	97.2071	6.00196	1.11639	87.0725	24.4582	235.61	11.4166	1916	771
9099	USP2	97.2063	1.01699	0.944469	102.922	4.52431	110.026	1.71178	1917	2381
11140	CDC37	97.1911	8.79487	0.871225	111.557	6.4736	109.123	28.0268	1918	3336
9201	DCLK1	97.1692	6.76676	0.973207	99.8443	1.08262	96.0092	8.20408	1919	2002
440275	EIF2AK4	97.1536	4.12197	1.05125	92.4171	4.72223	128.535	19.3242	1920	1234
8491	MAP4K3	97.1506	6.90779	0.933842	104.033	2.42923	91.2396	12.6782	1921	2510
10539	GLRX3	97.1481	6.19504	0.921113	105.468	4.34169	91.4026	34.291	1922	2692
63891	RNF123	97.147	3.60571	0.924459	105.085	1.68413	87.8939	1.95581	1923	2641
94160	ABCC12	97.1444	3.49591	0.948808	102.386	6.86757	92.2686	14.4215	1924	2327
27032	ATP2C1	97.1308	4.89079	0.937964	103.555	9.18114	137.206	48.8219	1925	2467
79784	MYH14	97.119	3.96377	0.965355	100.604	9.3921	83.4909	11.9645	1926	2100
90864	SPSB3	97.1177	7.46035	0.879748	110.393	3.27725	95.5805	25.6792	1927	3231
57115	PGLYRP4	97.1078	5.32075	0.961805	100.964	6.30888	90.8315	3.33095	1928	2144
5476	CTSA	97.0993	9.52424	0.906229	107.147	3.75481	84.5366	12.0711	1929	2885
347730	LRRTM1	97.0828	16.8154	0.869547	111.648	14.9559	87.5251	10.2512	1930	3357
5635	PRPSAP1	97.082	2.70557	0.945215	102.709	1.97936	99.5611	21.4615	1931	2372
8809	IL18R1	97.0814	8.53407	1.21381	79.9805	15.4862	106.276	4.8994	1932	382
4676	NAP1L4	97.0697	0.246585	1.00937	96.1686	7.06549	76.7426	12.1131	1933	1626
3750	KCND1	97.0691	5.69382	0.987986	98.2495	4.89643	89.9608	9.3084	1934	1856
318	NUDT2	97.0592	9.96938	0.936192	103.675	5.63307	98.0932	19.6356	1935	2487
60558	GUF1	97.0343	4.65417	0.995017	97.5203	5.40183	85.2876	15.163	1936	1785
344805	TMPRSS7	97.0298	7.54301	1.00641	96.4118	3.36719	100.875	13.7769	1937	1656
85004	RERG	97.026	3.24979	1.07173	90.5322	1.85145	106.041	26.1123	1938	1083
26060	APPL1	97.0249	9.26333	0.895666	108.327	4.26263	91.2516	7.8189	1939	3027
9154	SLC28A1	97.024	1.28344	0.951975	101.919	6.87028	123.327	28.4708	1940	2295
5775	PTPN4	96.9987	12.1666						1941	9000
2778	GNAS	96.9591	2.48439	0.922129	105.147	2.72174	122.448	3.0546	1942	2676
8614	STC2	96.9514	8.7307	0.887958	109.185	9.7297	94.4982	16.511	1943	3128
140	ADORA3	96.9492	32.557	1.05131	92.2178	5.21647	98.8765	18.1527	1944	1233
23315	SLC9A8	96.9476	3.36836	0.932542	103.96	4.40198	112.047	7.49258	1945	2524
57470	LRRC47	96.9455	6.82407	0.947128	102.357	5.26466	96.8893	11.9242	1946	2345
5099	PCDH7	96.929	4.58466	1.0686	90.7069	2.01815	98.1909	14.2191	1947	1102
813	CALU	96.9283	4.61563	0.992734	97.6378	3.58625	134.759	33.7922	1948	1806
64403	CDH24	96.9022	8.7397	0.904485	107.135	5.08248	74.7445	6.19312	1949	2915
115703	SNX26	96.8819	3.98381	0.871875	111.119	1.79391	93.5001	10.2452	1950	3328
6470	SHMT1	96.8775	7.61937	0.909164	106.557	7.46438	123.527	16.0129	1951	2838
170506	DHX36	96.8576	9.49172	0.982725	98.5602	3.97361	118.134	4.9316	1952	1898
51805	COQ3	96.8467	8.44642	1.14793	84.3665	11.5996	165.793	42.1487	1953	624
10126	DNAL4	96.839	15.9138	0.974842	99.3381	0.929988	92.3228	15.1887	1954	1979
8195	MKKS	96.8351	4.84365	0.924595	104.732	3.7074	97.3657	9.18984	1955	2639
51296	SLC15A3	96.8295	10.4494	1.21541	79.6682	7.68535	104.671	11.8616	1956	376
64326	RFWD2	96.8199	6.19126	0.946939	102.245	4.24038	104.388	15.1546	1957	2346
64924	SLC30A5	96.8176	10.6257	0.91872	105.383	8.84591	158.484	31.6367	1958	2727
4682	NUBP1	96.8156	3.42258	0.979711	98.8205	11.3774	85.1256	11.3955	1959	1929
5861	RAB1A	96.8117	3.41664	0.873251	110.864	1.9369	121.443	20.8266	1960	3310
79180	EFHD2	96.8114	2.47929	1.03349	93.6742	6.70684	85.3731	28.3172	1961	1394
9734	HDAC9	96.8093	3.58951	0.935394	103.496	6.33858	112.949	12.726	1962	2495
55860	ACTR10	96.8091	3.67166	0.968828	99.924	5.5548	128.455	3.8267	1963	2058
360132	FKBP9L	96.805	4.08072	1.12726	85.8766	13.3169	86.3581	7.61121	1964	714
2702	GJA5	96.798	1.82202	0.985548	98.2174	1.86553	141.067	7.19655	1965	1873
1952	CELSR2	96.7834	7.20318	0.970064	99.7701	9.2665	93.9093	4.3914	1966	2044
4047	LSS	96.779	8.61745	0.878791	110.127	5.04825	114.219	4.56219	1967	3240
808	CALM3	96.7726	6.71921	0.888181	108.956	2.55666	99.6888	2.37689	1968	3126
8972	MGAM	96.7628	0.661474	1.21762	79.4688	7.23381	117.965	5.38997	1969	368
1000	CDH2	96.7478	2.72645	1.15001	84.1281	1.68973	319.419	41.4813	1970	617
7976	FZD3	96.735	5.63066	0.92575	104.494	5.13899	92.8333	16.4911	1971	2622
79947	DHDDS	96.734	8.27514	0.913661	105.875	5.50648	82.3796	13.7806	1972	2801
208	AKT2	96.7119	7.31385	0.920039	105.117	2.79785	92.8809	17.944	1973	2705
11188	NISCH	96.7111	1.96829	0.92134	104.968	8.27234	83.6976	8.08749	1974	2687
219	ALDH1B1	96.7048	4.35378	0.978513	98.8284	16.3775	110.874	18.5441	1975	1939
3360	HTR4	96.698	6.09529	0.914536	105.735	5.90176	85.9807	5.14867	1976	2787
5298	PI4KB	96.6861	7.51078						1977	9000
83858	ATAD3B	96.6853	3.60135	0.954314	101.314	4.74794	97.1367	13.5141	1978	2261
1186	CLCN7	96.6806	7.94914						1979	9000
2042	EPHA3	96.6734	10.9547	0.963709	100.314	10.2148	101.512	14.1753	1980	2117
56994	CHPT1	96.6577	6.35994	1.05355	91.7448	6.53037	119.407	17.2383	1981	1213
18	ABAT	96.6515	3.57542	0.900677	107.31	3.10732	88.4195	9.08095	1982	2966
3775	KCNK1	96.6502	15.3064	1.01584	95.1436	1.98208	106.952	27.413	1983	1566
79672	FN3KRP	96.6408	2.7844	0.975574	99.0604	2.28989	152.607	12.8439	1984	1968
4482	MSRA	96.6408	2.4167	0.956577	101.028	4.60773	123.661	9.50175	1985	2221
1613	DAPK3	96.6144	3.51705	0.965095	100.109	3.80471	102.059	15.5242	1986	2101
57053	CHRNA10	96.6051	31.2287	0.981199	98.4562	3.7412	117.418	15.702	1987	1913
60437	CDH26	96.6035	4.24518	1.12447	85.9101	9.68925	96.0362	13.8382	1988	726
5597	MAPK6	96.601	5.3282	1.03166	93.6362	7.10949	89.1355	17.9437	1989	1407
26051	PPP1R16B	96.5915	4.07142	1.01763	94.918	3.99234	100.552	11.7537	1990	1551
4247	MGAT2	96.5797	7.19196	0.924457	104.472	4.41235	149.969	0.438285	1991	2642
2805	GOT1	96.569	7.10167	0.902761	106.971	11.4229	78.2223	30.8049	1992	2943
577	BAI3	96.5524	14.6778						1993	9000
1373	CPS1	96.5524	4.38764	0.957993	100.786	4.39843	93.1716	8.4689	1994	2198
2184	FAH	96.5468	6.75749	0.944187	102.254	9.31304	103.583	14.6058	1995	2384
1933	EEF1B2	96.5365	4.81334	0.946605	101.982	5.37826	85.1446	15.0771	1996	2353
83660	TLN2	96.5352	2.57727	0.977692	98.7379	3.91181	105.418	12.3292	1997	1948
6237	RRAS	96.5161	4.29275						1998	9000
51209	RAB9B	96.4937	5.51247	1.02346	94.2819	3.99557	169.474	15.266	1999	1497
[truncated: 2,998 more rows]
