# Supplementary material for: RNAi Screen for NRF2 Inducers Identifies Targets That Rescue Primary Lung Epithelial Cells from Cigarette Smoke Induced Radical Stress
Source: PLoS One. 2016 Nov 10;11(11):e0166352. doi: 10.1371/journal.pone.0166352 (PMC5104413; doi:10.1371/journal.pone.0166352)
Supplement: S2 Table — (XLSX) [file pone.0166352.s002.xlsx]

## Sheet: Sheet1
gene_acc	gene_name	mean normalized Luc induction (% of controls)	SD	mean Luciferase induction/number of nuclei	luc norm hit
1659	DHX8	226.168	81.4412	2.44079	0
7172	TPMT	183.303	9.17418	2.0491	0
10922	FASTK	181.997	10.8073	2.15874	0
9024	BRSK2	180.889	13.5935	1.9952	0
10622	POLR3G	179.576	1.86552	2.0777	0
23049	SMG1	176.76	17.8705	1.78678	0
56623	INPP5E	171.394	13.7973	1.74408	0
8648	NCOA1	169.975	6.56966	1.53267	0
7323	UBE2D3	169.897	13.0698	2.19197	0
6895	TARBP2	168.533	9.71258	1.92744	0
27036	SIGLEC7	165.026	10.3988	1.58632	0
103	ADAR	160.665	21.0266	1.68011	0
5195	PEX14	159.633	58.7628	1.50805	0
4074	M6PR	159.592	6.98459	1.8659	0
5701	PSMC2	159.556	29.3604	1.75157	0
10856	RUVBL2	159.237	9.96161	1.68626	0
390	RND3	157.971	41.7473	1.76227	0
387700	SLC16A12	155.948	10.0523	1.53789	0
2677	GGCX	154.618	16.0542	1.7733	0
1869	E2F1	154.151	13.7277	1.56951	0
2581	GALC	153.406	28.4279	1.76902	0
1861	TOR1A	152.86	18.4461	1.53366	0
8500	PPFIA1	152.68	37.2329	1.37615	0
5783	PTPN13	152.669	10.173	1.63552	0
381	ARF5	152.506	1.68111	1.43763	0
9931	HELZ	151.872	44.4808	1.50241	0
83937	RASSF4	150.686	34.6024	1.38601	0
9651	PLCH2	150.374	6.52986	1.49631	0
9628	RGS6	149.421	28.0544	2.62848	0
2563	GABRD	149.153	5.8929	1.62106	0
347734	SLC35B2	149.053	14.0424	1.23655	0
26121	PRPF31	149.014	7.90833	1.57607	0
6633	SNRPD2	148.219	53.1728	1.43158	0
5883	RAD9A	147.643	48.7963	1.36997	0
10859	LILRB1	147.41	10.0273	1.86769	0
2475	FRAP1	145.568	11.7095	1.71404	0
225689	MAPK15	144.495	19.3898	1.343	0
6839	SUV39H1	144.316	18.6145	1.64294	0
79042	TSEN34	144.228	16.6795	1.21001	0
408	ARRB1	143.833	7.06924	1.18888	0
488	ATP2A2	143.545	12.8443	1.40505	0
7388	UQCRH	143.439	5.0636	1.16973	0
10587	TXNRD2	143.275	6.87709	1.52695	0
54504	CPVL	143.257	13.8941	1.38039	0
9343	EFTUD2	143.145	34.348	1.4996	0
10299	MARCH6	142.599	12.2848	1.36393	0
7415	VCP	141.824	10.1679	1.16013	0
9188	DDX21	141.692	45.8593	1.4116	0
79739	TTLL7	141.68	46.8487	1.41777	0
3597	IL13RA1	141.647	41.3611	1.27566	0
54510	PCDH18	141.635	15.1652	1.47734	0
11245	GPR176	141.545	5.6432	1.40523	0
8710	SERPINB7	141.374	14.1697	1.43957	0
411	ARSB	141.265	7.27451	1.29421	0
5700	PSMC1	140.272	27.8192	1.51844	0
5708	PSMD2	140.192	4.90216	1.49099	0
2872	MKNK2	140.158	4.15595	1.36884	0
26958	COPG2	139.758	20.5688	1.46969	0
4920	ROR2	139.655	4.83485	1.38408	0
4943	TBC1D25	139.646	9.72926	1.62445	0
90990	KIFC2	139.553	13.5707	1.65909	0
1612	DAPK1	139.288	27.35	1.40503	0
1428	CRYM	139.072	18.767	1.1908	0
374875	HSD11B1L	138.612	13.239	1.23654	0
55486	PARL	138.498	24.5857	1.48977	0
85015	USP45	138.201	27.1078	1.27591	0
8314	BAP1	138.032	3.88007	1.54902	0
23228	PLCL2	137.585	14.6551	1.46006	0
60468	BACH2	137.474	7.98394	1.68443	0
9953	HS3ST3B1	137.3	3.12932	1.44557	0
66005	CHID1	137.194	11.0699	1.08713	0
81502	HM13	136.799	28.8188	1.21411	0
4439	MSH5	136.755	17.4279	1.31712	0
4249	MGAT5	136.609	9.59977	1.42625	0
6654	SOS1	136.11	41.1105	1.18898	0
6781	STC1	135.735	16.3453	1.51064	0
107	ADCY1	135.582	2.46475	1.38283	0
2643	GCH1	135.455	19.402	1.35615	0
5511	PPP1R8	135.441	11.8512	1.28412	0
79623	GALNT14	135.377	9.33237	1.3279	0
23765	IL17RA	135.138	15.1473	1.469	0
867	CBL	134.996	4.10636	1.31444	0
84547	PGBD1	134.882	17.2666	1.49471	0
57165	GJC2	134.871	6.07772	1.46881	0
8803	SUCLA2	134.801	41.7489	1.26602	0
6047	RNF4	134.763	27.2094	1.32522	0
2173	FABP7	134.591	9.00479	1.46879	0
11020	RABL4	134.527	9.83271	1.41462	0
571	BACH1	134.304	9.06768	1.30097	0
50807	ASAP1	134.278	5.3904	1.368	0
10221	TRIB1	134.261	29.2813	1.44216	0
330	BIRC3	134.257	22.621	1.33907	0
23161	SNX13	134.005	12.1936	1.35824	0
9616	RNF7	133.191	20.105	1.28006	0
25898	RCHY1	133.156	18.8099	1.39025	0
56949	XAB2	133.076	13.7666	1.2786	0
5033	P4HA1	133.064	6.23277	1.3898	0
1299	COL9A3	133.034	38.1823	1.32772	0
23646	PLD3	132.948	23.7933	1.24186	0
3752	KCND3	132.933	11.7855	1.26998	0
55640	FLVCR2	132.766	4.62417	1.2937	0
6674	SPAG1	132.754	25.5729	1.40917	0
5129	PCTK3	132.744	3.19137	1.36587	0
4833	NME4	132.383	8.38579	1.35322	0
5947	RBP1	132.246	2.99209	1.91937	0
5251	PHEX	132.141	12.7292	1.60911	0
4946	OAZ1	132.132	7.20107	1.2795	0
5998	RGS3	132.096	11.8523	1.35824	0
55699	IARS2	131.746	13.0409	1.13898	0
9517	SPTLC2	131.722	12.5507	1.19017	0
23564	DDAH2	131.621	6.24419	1.25164	0
1123	CHN1	131.616	4.77112	1.37842	0
23583	SMUG1	131.31	20.8007	1.3393	0
6785	ELOVL4	131.18	1.22563	1.32017	0
7060	THBS4	131.144	9.29135	1.31845	0
84926	SPRYD3	130.94	7.49199	1.12906	0
56895	AGPAT4	130.871	12.3552	1.38521	0
113189	CHST14	130.676	15.1632	1.31804	0
114609	TIRAP	130.522	1.04685	1.16998	0
5190	PEX6	130.483	15.7085	1.31543	0
23510	KCTD2	130.471	3.59171	1.2697	0
2109	ETFB	130.26	31.5487	1.90321	0
83714	NRIP2	130.253	20.292	1.29314	0
55743	CHFR	130.249	24.5648	1.31844	0
29925	GMPPB	130.171	41.8789	1.44534	0
23589	CARHSP1	130.165	48.4701	1.32553	0
6632	SNRPD1	130.087	14.5424	1.25541	0
51199	NIN	129.964	8.96949	1.4113	0
4884	NPTX1	129.916	4.61017	1.15241	0
4350	MPG	129.758	34.4407	1.23191	0
9530	BAG4	129.564	10.1565	1.3694	0
10430	TMEM147	129.325	8.24261	1.24967	0
5704	PSMC4	128.707	4.00218	1.28212	0
1950	EGF	128.427	11.5613	1.03237	0
11231	SEC63	128.383	1.99074	1.05717	0
10998	SLC27A5	128.284	1.24264	1.45982	0
394	ARHGAP5	128.241	6.27341	1.40938	0
391365	SULT6B1	128.237	12.2995	1.1397	0
9578	CDC42BPB	128.138	16.6752	1.34515	0
1384	CRAT	128.128	15.1702	1.2372	0
7249	TSC2	127.887	2.57911	1.34399	0
55644	OSGEP	127.619	14.9347	1.35183	0
6541	SLC7A1	127.352	16.1209	1.32174	0
1261	CNGA3	127.293	9.99429	1.40474	0
63915	MUTED	127.273	12.321	1.42801	0
51095	TRNT1	127.273	30.082	1.46025	0
3604	TNFRSF9	127.238	9.53148	1.21721	0
349667	RTN4RL2	127.133	13.2733	1.09079	0
4688	NCF2	127.109	37.7445	1.14619	0
2204	FCAR	127.05	14.5346	1.18016	0
11018	TMED1	127.009	8.30381	1.24792	0
54549	SDK2	126.744	7.29143	1.16476	0
23432	GPR161	126.591	7.01369	1.29966	0
5300	PIN1	126.53	32.6514	1.22534	0
25942	SIN3A	126.485	4.46142	1.13811	0
64072	CDH23	126.478	2.87824	1.20604	0
11021	RAB35	126.424	6.92482	1.31689	0
10089	KCNK7	126.399	17.0747	1.33134	0
81033	KCNH6	126.383	21.6664	1.32534	0
9364	RAB28	126.184	7.35526	1.67897	1
4716	NDUFB10	126.115	35.5667	1.37565	1
2235	FECH	125.411	7.01142	1.77305	1
23162	MAPK8IP3	124.626	13.7684	1.39515	1
329	BIRC2	123.939	9.90358	1.39061	1
2011	MARK2	123.851	10.614	1.42453	1
6647	SOD1	123.35	6.79212	1.36461	1
51128	SAR1B	123.016	3.90225	1.4826	1
5426	POLE	122.871	40.3162	1.49137	1
2186	BPTF	122.788	12.6886	1.53926	1
79085	SLC25A23	122.504	47.5441	1.68099	1
3635	INPP5D	121.826	9.75396	1.35464	1
51686	OAZ3	121.801	26.9898	1.43501	1
7874	USP7	121.476	14.2599	1.58002	1
80059	LRRTM4	120.865	3.2075	1.41971	1
2280	FKBP1A	120.289	8.58632	1.35515	1
4696	NDUFA3	120.036	27.6473	1.36697	1
22901	ARSG	118.881	4.0247	2.4164	1
2519	FUCA2	118.827	7.80277	1.59552	1
5817	PVR	118.73	7.29286	1.36067	1
10671	DCTN6	118.633	9.19571	1.37552	1
23545	ATP6V0A2	118.333	20.2687	2.88258	1
780	DDR1	116.738	9.67224	1.38014	1
9739	SETD1A	115.462	5.57312	1.4819	1
51127	TRIM17	114.583	5.48096	1.45032	1
11015	KDELR3	114.522	12.9122	1.55433	1
7991	TUSC3	114.418	2.98969	1.48536	1
9900	SV2A	114.264	41.0827	1.57446	1
10585	POMT1	113.26	0.967046	1.38928	1
3688	ITGB1	111.478	7.89015	1.50788	1
83746	L3MBTL2	111.142	11.3379	1.38531	1
63908	NAPB	110.151	2.65287	1.41531	1
80724	ACAD10	108.648	1.44712	1.40723	1
8436	SDPR	106.9	4.88763	1.45931	1
858	CAV2	106.098	11.2677	1.58787	1
23046	KIF21B	105.546	2.98472	1.34399	1
9743	RICS	105.1	7.88757	1.34518	1
2101	ESRRA	104.229	0.94636	1.49192	1
8811	GALR2	101.994	1.31758	1.35532	1
79734	KCTD17	101.948	6.65232	1.34039	1
65264	UBE2Z	101.768	5.48804	1.35745	1
64854	USP46	99.7309	7.58064	1.47419	1
11316	COPE	99.6649	3.7421	1.67484	1
81889	FAHD1	98.1071	4.491	1.35237	1
3728	JUP	97.7364	20.0871	1.50584	1
5331	PLCB3	97.7256	13.2803	1.36409	1
57038	RARS2	95.6852	5.43081	1.40738	1
23022	PALLD	94.6486	8.30228	1.69725	1
11313	LYPLA2	93.3693	2.93362	1.49638	1
23039	XPO7	93.2064	3.45908	1.42155	1
22921	MSRB2	92.6858	4.25784	1.35553	1
9861	PSMD6	92.3754	5.4534	1.34357	1
2932	GSK3B	92.3198	5.2832	1.4342	1
8793	TNFRSF10D	91.3516	6.75191	3.99815	1
2669	GEM	91.0314	10.2613	1.34401	1
203427	SLC25A43	90.8964	9.573	1.35094	1
3384	ICAM2	89.559	6.11379	1.43532	1
5924	RASGRF2	88.3791	5.38865	1.85429	1
414301	DDI1	83.0701	2.34987	5.42766	1
5347	PLK1	75.3623	10.8773	1.34803	1
