# Supplementary material for: RNAi Screen for NRF2 Inducers Identifies Targets That Rescue Primary Lung Epithelial Cells from Cigarette Smoke Induced Radical Stress
Source: PLoS One. 2016 Nov 10;11(11):e0166352. doi: 10.1371/journal.pone.0166352 (PMC5104413; doi:10.1371/journal.pone.0166352)
Supplement: S3 Table — Screening hits are marked in grey. (XLSX) [file pone.0166352.s003.xlsx]

## Sheet: Sheet1
gene_acc	gene_name	sirna_ids	mean normalized Luc induction (% of controls)	SD	mean Luc induction/cell	mean normalized number of nuclei (% of controls)	SD	mean normalized nuclear condensation index (% of controls)	SD	rank by RSA	rank by top siRNA Luc induction	rank by top siRNA Luc induction/cell
80724	ACAD10	10330381	133.067	13.8662	1.35138	98.4675	2.92926	126.661	6.92013	97	153	114
80724	ACAD10	10342849	97.3089	3.25118	1.03599	93.9281	6.349	106.269	15.8968	97	153	114
80724	ACAD10	10322720	87.7805	7.44944	1.04694	83.8449	10.2612	108.428	30.2181	97	153	114
103	ADAR	10327012	165.211	10.5753	1.74407	94.7271	3.95898	157.399	24.3219	26	53	30
103	ADAR	10333849	119.347	12.1714	1.23535	96.6097	0.902352	110.688	3.6173	26	53	30
103	ADAR	10339635	102.326	16.4336	1.07382	95.2917	7.93597	126.33	6.17359	26	53	30
107	ADCY1	10333845	138.516	11.3114	1.51733	91.289	4.69721	127.489	9.45812	79	139	62
107	ADCY1	10339631	113.787	6.30504	1.09638	103.784	1.45007	213.817	21.7901	79	139	62
107	ADCY1	10327008	100.117	12.8818	0.986821	101.454	7.4342	105.442	12.2973	79	139	62
56895	AGPAT4	10330216	152.373	20.8907	1.53074	99.5421	4.94999	124.918	12.5958	40	81	59
56895	AGPAT4	10322554	108.776	11.1759	1.11212	97.8099	3.22654	83.0588	4.72077	40	81	59
56895	AGPAT4	10320048	79.6426	5.25249	0.897143	88.7737	5.23191	102.188	8.66877	40	81	59
381	ARF5	10326800	126.442	9.03606	1.28084	98.7178	3.92051	114.286	7.21282	122	35	140
381	ARF5	10337179	113.92	14.63	1.14437	99.5484	2.63128	119.418	13.4275	122	35	140
381	ARF5	10333640	113.198	8.10965	1.13735	99.5278	8.34984	112.161	22.3706	122	35	140
394	ARHGAP5	10333644	115.683	4.54441	1.18798	97.3785	7.10687	96.4382	5.97234	172	206	177
394	ARHGAP5	10337183	102.318	7.90706	1.08045	94.699	7.31204	111.754	18.1841	172	206	177
394	ARHGAP5	10326804	76.4868	5.59779	0.800912	95.4997	3.97847	83.9125	28.2465	172	206	177
408	ARRB1	10337200	108.846	2.61008	1.00585	108.213	6.94626	104.196	6.44154	198	195	205
408	ARRB1	10326821	94.145	3.23049	1.10078	85.5256	7.21971	155.927	18.683	198	195	205
408	ARRB1	10333661	93.1678	5.85245	1.04977	88.751	3.4533	161.973	9.80741	198	195	205
411	ARSB	10337203	115.757	5.5067	1.20536	96.035	8.2205	103.375	4.39955	171	102	164
411	ARSB	10326824	109.206	10.3805	1.05882	103.139	5.72112	133.021	4.77577	171	102	164
411	ARSB	10333664	104.879	3.89934	1.05006	99.8796	5.47436	104.918	36.8478	171	102	164
22901	ARSG	10324446	114.22	1.04644	1.34232	85.0909	3.78383	192.173	30.4137	180	202	118
22901	ARSG	10320829	94.5272	9.27565	0.945282	99.999	8.49733	193.752	33.3104	180	202	118
22901	ARSG	10328321	90.274	3.69451	0.950312	94.9941	4.74738	105.398	3.22749	180	202	118
50807	ASAP1	10329603	198.704	11.8866	2.17829	91.2205	3.74009	155.46	30.5809	10	21	9
50807	ASAP1	10323154	103.245	3.67471	1.01387	101.832	2.67202	86.1851	11.9762	10	21	9
50807	ASAP1	10321680	89.9991	8.0783	0.952561	94.4813	3.08196	109.062	13.3623	10	21	9
488	ATP2A2	10317321	125.088	8.52092	1.1954	104.641	4.25459	116.492	28.3132	129	100	171
488	ATP2A2	10341262	111.383	2.33988	1.13274	98.3311	3.49186	96.0418	13.8828	129	100	171
488	ATP2A2	10314309	105.489	2.68686	1.0675	98.8189	2.52372	106.054	12.0552	129	100	171
23545	ATP6V0A2	10321034	118.654	5.93055	1.1367	104.384	2.3348	118.964	5.01464	157	199	196
23545	ATP6V0A2	10323968	100.146	10.2669	0.97871	102.324	4.46736	90.8766	6.29507	157	199	196
23545	ATP6V0A2	10328874	92.3832	3.73318	0.878689	105.138	3.69744	108.508	17.1061	157	199	196
571	BACH1	10326868	123.116	2.90532	1.24985	98.5047	0.796992	115.114	6.36549	137	190	152
571	BACH1	10333707	102.005	7.19622	1.2134	84.0653	16.7008	126.848	5.07725	137	190	152
571	BACH1	10337249	89.1712	14.2218	0.906869	98.3286	1.89553	87.4978	2.19071	137	190	152
60468	BACH2	10322392	149.2	11.151	1.64835	90.5144	8.87774	113.642	10.2548	43	9	41
60468	BACH2	10320577	137.994	7.42118	1.49429	92.3476	1.1474	131.43	13.7326	43	9	41
60468	BACH2	10330054	120.377	13.6818	1.27852	94.1532	4.19551	102.4	15.1461	43	9	41
9530	BAG4	10335033	160.428	26.7672	1.70509	94.0882	4.82609	231.399	15.1873	29	33	32
9530	BAG4	10327762	118.397	8.07826	1.18072	100.275	1.9401	103.986	13.5763	29	33	32
9530	BAG4	10340561	113.805	8.87092	1.10063	103.4	7.03145	118.118	15.1119	29	33	32
8314	BAP1	10314842	123.85	4.11063	1.3543	91.4494	5.36732	116.199	13.2588	135	118	110
8314	BAP1	10318790	116.249	7.45387	1.17533	98.9075	1.86789	201.93	26.1858	135	118	110
8314	BAP1	10332110	103.029	12.0003	1.12831	91.3122	5.9029	147.91	60.2173	135	118	110
329	BIRC2	10337056	124.009	8.81191	1.25176	99.0678	8.01243	78.8986	8.82132	133	121	151
329	BIRC2	10333950	116	17.4414	1.15035	100.839	3.67903	95.0863	19.6007	133	121	151
329	BIRC2	10326939	86.0325	5.86639	0.945452	90.9961	3.85115	197.883	47.0703	133	121	151
330	BIRC3	10337050	115.274	3.48591	1.13126	101.899	1.97576	71.8694	15.6088	174	80	175
330	BIRC3	10333944	113.619	5.57497	1.18884	95.5709	6.70185	98.5835	24.789	174	80	175
330	BIRC3	10326933	108.007	4.99972	1.16671	92.5735	3.72679	92.4978	7.46664	174	80	175
2186	BPTF	10325486	120.919	1.71321	1.67844	72.0426	10.9002	194.686	65.2932	145	178	38
2186	BPTF	10337909	101.061	6.19962	1.06638	94.7705	7.36008	112.089	6.63089	145	178	38
2186	BPTF	10333244	96.995	0.690157	1.01861	95.2234	4.13565	175.203	14.142	145	178	38
9024	BRSK2	10329267	114.602	10.0329	1.25418	91.3759	9.26084	145.692	22.4742	177	184	149
9024	BRSK2	10322036	109.212	5.62363	1.07077	101.994	2.99884	108.767	22.3283	177	184	149
9024	BRSK2	10324103	46.9448	3.46985	0.472587	99.3358	8.63963	186.012	41.7623	177	184	149
23589	CARHSP1	10328887	107.549	3.08295	0.979964	109.748	4.32173	138.843	42.5754	202	189	222
23589	CARHSP1	10323981	98.5346	0.955599	0.91958	107.152	2.57979	123.82	11.7745	202	189	222
23589	CARHSP1	10321047	94.7188	1.73606	0.942642	100.482	3.22539	90.931	14.4652	202	189	222
858	CAV2	10326775	153.517	17.0068	1.69912	90.3509	6.3031	198.112	45.5305	39	78	34
858	CAV2	10337154	108.092	11.1608	1.23475	87.5415	8.31228	194.765	63.3451	39	78	34
858	CAV2	10333788	92.9867	2.42562	0.931729	99.8001	3.86784	132.905	9.34204	39	78	34
867	CBL	10333799	128.918	8.78142	1.29603	99.472	2.64926	108.444	6.08558	109	25	136
867	CBL	10337166	125.434	13.7684	1.28752	97.4224	1.78251	101.086	8.66568	109	25	136
867	CBL	10326787	115.454	10.7183	1.15318	100.118	6.16584	121.003	7.55154	109	25	136
9578	CDC42BPB	10246488	110.978	7.57585	1.1982	92.6206	6.95401	95.164	22.9195	190	217	170
9578	CDC42BPB	10246489	97.9774	5.1723	0.94017	104.212	3.45024	89.2098	18.4227	190	217	170
9578	CDC42BPB	10329289	80.8586	8.7928	0.856801	94.3727	0.73609	107.001	17.1794	190	217	170
64072	CDH23	10320620	118.378	11.5283	1.16155	101.914	5.23121	101.266	8.05892	159	46	186
64072	CDH23	10330098	114.71	8.62879	1.11908	102.503	0.475193	156.602	25.9492	159	46	186
64072	CDH23	10322955	111.612	9.54857	1.06914	104.394	3.22176	124.662	26.7296	159	46	186
55743	CHFR	10329734	116.056	21.5352	1.28285	90.4675	9.63503	155.98	36.712	170	183	139
55743	CHFR	10319910	106.97	4.66108	1.06674	100.278	4.51917	105.095	11.358	170	183	139
55743	CHFR	10323451	96.2039	6.33358	0.95366	100.879	6.10835	98.3995	4.43973	170	183	139
66005	CHID1	10330557	130.013	16.7472	1.23364	105.39	2.81482	102.367	18.8384	106	87	156
66005	CHID1	10322896	119.733	12.9287	1.23408	97.0224	4.39486	111.16	9.93274	106	87	156
66005	CHID1	10320733	94.6901	3.04742	0.899549	105.264	2.45181	108.482	17.9098	106	87	156
1123	CHN1	10333576	154.361	13.952	1.51835	101.664	2.81857	110.536	8.65224	38	75	61
1123	CHN1	10325821	100.83	2.23567	1.0452	96.4697	4.42562	88.8996	19.9262	38	75	61
1123	CHN1	10336940	76.1325	6.29798	0.743839	102.351	2.93781	90.4005	22.7595	38	75	61
113189	CHST14	10313330	147.379	7.70418	1.60903	91.5952	2.07841	114.748	3.69637	48	69	44
113189	CHST14	10343247	123.757	12.1686	1.24989	99.0147	3.24417	113.996	17.6496	48	69	44
113189	CHST14	10330779	67.9763	9.74852	0.731104	92.9777	10.1737	143.804	1.1688	48	69	44
1261	CNGA3	10317372	151.606	7.09463	1.64064	92.4066	4.26465	97.9364	6.24622	41	12	42
1261	CNGA3	10341314	143.932	5.14618	1.52337	94.4825	3.04409	105.369	7.42945	41	12	42
1261	CNGA3	10314360	86.2399	3.86321	0.921297	93.607	6.12695	132.149	23.4224	41	12	42
1299	COL9A3	10335507	122.063	2.12932	1.32527	92.1044	4.95721	103.546	10.5479	141	141	122
1299	COL9A3	10336450	114.113	27.4866	1.24535	91.6314	2.41072	123.466	23.5833	141	141	122
1299	COL9A3	10340180	94.2133	8.35942	1.14769	82.0893	3.69528	178.055	29.2298	141	141	122
11316	COPE	10328288	97.9992	1.27408	1.06782	91.7752	2.01777	134.64	16.7212	221	208	213
11316	COPE	10324413	91.7034	4.02446	0.945547	96.9845	9.11759	143.822	4.8887	221	208	213
11316	COPE	10320796	87.0087	6.99274	0.814249	106.858	0.538623	121.575	4.16234	221	208	213
26958	COPG2	10328894	184.721	20.705	1.89862	97.2922	1.93005	128.911	22.255	13	31	18
26958	COPG2	10324236	133.557	46.2208	1.53017	87.2824	9.95798	86.2686	13.0255	13	31	18
26958	COPG2	10321828	104.778	11.4937	1.09848	95.3851	3.13877	215.197	12.5232	13	31	18
54504	CPVL	10318719	120.003	5.90239	1.16136	103.33	3.28921	122.521	15.9781	153	198	187
54504	CPVL	10331867	96.3938	8.88813	0.967588	99.6228	2.1682	103.854	12.1471	153	198	187
54504	CPVL	10313995	89.8294	2.51072	0.876339	102.505	1.62085	122.847	8.58681	153	198	187
1384	CRAT	10325858	171.671	13.0367	1.82175	94.2343	3.59601	124.75	12.7463	22	49	23
1384	CRAT	10333613	111.322	3.0382	1.1297	98.5414	10.381	117.027	19.0915	22	49	23
1384	CRAT	10336977	86.5625	4.81553	1.46127	59.2377	15.0451	439.535	158.511	22	49	23
1428	CRYM	10336992	137.018	7.72234	1.4427	94.9734	3.88725	154.415	8.06245	84	89	85
1428	CRYM	10333628	119.009	9.20385	1.19893	99.2626	3.59373	124.143	15.3145	84	89	85
1428	CRYM	10325873	78.2271	3.26905	0.800852	97.6798	1.59824	108.981	18.1097	84	89	85
8452	CUL3	10345417	165.298	2.10713	1.85816	88.9578	7.29982	104.514	6.37184	25	5	20
8452	CUL3	10345418	153.155	5.28255	1.64633	93.0278	5.93317	104.28	27.2074	25	5	20
8452	CUL3	10345419	68.0008	2.83751	0.82285	82.6405	2.6142	92.5685	15.5473	25	5	20
1612	DAPK1	10331359	134.755	6.20317	1.25924	107.013	2.20969	130.372	16.1148	89	149	148
1612	DAPK1	10339474	107.31	23.6931	0.994338	107.921	5.99967	123.05	12.0556	89	149	148
1612	DAPK1	10326439	95.0361	2.12444	1.03234	92.0586	4.1811	102.989	8.50473	89	149	148
10671	DCTN6	10328426	135.14	14.3283	1.45385	92.9531	1.18252	111.161	13.2654	88	115	79
10671	DCTN6	10321280	114.083	4.14957	1.15628	98.6643	1.57713	137.522	23.3045	88	115	79
10671	DCTN6	10325071	104.127	9.64028	1.07283	97.0584	7.30934	111.839	15.4261	88	115	79
23564	DDAH2	10328882	146.384	12.408	1.43912	101.717	3.66452	124.167	9.70971	54	94	87
23564	DDAH2	10321042	107.612	4.08448	1.20679	89.1722	5.97297	102.597	17.7109	54	94	87
23564	DDAH2	10323976	105.904	6.16706	1.18928	89.0487	1.80506	135.807	16.4853	54	94	87
414301	DDI1	10314781	120.511	12.0545	1.31722	91.4892	1.84386	163.431	31.1757	147	159	126
414301	DDI1	10332049	111.755	2.95818	1.13409	98.5419	2.39961	116.84	25.8565	147	159	126
414301	DDI1	10318900	76.4863	11.0068	0.777072	98.4289	2.89988	203.415	4.82159	147	159	126
780	DDR1	10339427	109.284	2.05514	1.09966	99.3802	6.26408	140.899	29.6793	197	126	70
780	DDR1	10326390	108.715	8.5856	1.00633	108.031	7.83632	113.914	19.6674	197	126	70
780	DDR1	10331310	103.069	14.6925	1.49352	69.0107	9.11345	372.75	134.313	197	126	70
9188	DDX21	10327090	126.083	16.1543	1.23653	101.965	0.307416	89.7425	10.6239	126	142	155
9188	DDX21	10334101	114.036	2.51992	1.21716	93.6901	5.90715	138.174	22.7773	126	142	155
9188	DDX21	10339712	100.44	13.4115	0.94616	106.155	3.72557	104.798	8.09036	126	142	155
1659	DHX8	10333379	292.693	114.044	3.26399	89.6735	8.22642	176.514	34.4808	2	2	1
1659	DHX8	10325621	193.951	57.1488	2.33967	82.8967	21.2624	145.111	54.5922	2	2	1
1659	DHX8	10246188	82.4811	3.54765	0.909383	90.7	5.4836	141.263	8.47672	2	2	1
1869	E2F1	10325535	121.34	7.54271	1.21287	100.044	8.24805	131.929	10.9558	144	108	106
1869	E2F1	10337611	117.056	4.56409	1.37014	85.4336	1.52966	84.1997	19.5117	144	108	106
1869	E2F1	10333120	99.3969	4.97599	1.11296	89.3083	8.43947	152.89	65.1334	144	108	106
9343	EFTUD2	10334147	145.912	4.12805	1.42982	102.049	9.78994	101.712	4.11016	56	32	90
9343	EFTUD2	10327136	115.817	9.99026	1.17016	98.9754	2.27641	179.613	28.3283	56	32	90
9343	EFTUD2	10339757	113.912	4.68404	1.17175	97.2152	2.74432	106.867	13.4276	56	32	90
1950	EGF	10337635	112.893	8.89041	1.1153	101.222	3.45253	97.0241	7.3572	181	200	201
1950	EGF	10333144	92.6137	5.55722	0.936018	98.9444	5.89729	110.841	11.5901	181	200	201
1950	EGF	10325559	92.2971	3.41863	0.921421	100.168	6.38519	92.8551	10.1186	181	200	201
6785	ELOVL4	10317449	141.636	18.4493	1.32239	107.106	4.15368	81.5063	6.01132	67	30	101
6785	ELOVL4	10314267	128.556	9.84879	1.3821	93.0149	2.70346	74.5091	2.11521	67	30	101
6785	ELOVL4	10341053	114.107	17.61	1.15882	98.4683	4.04804	101.446	12.0845	67	30	101
2101	ESRRA	10317649	129.482	10.1702	1.29928	99.6561	5.22415	164.852	44.1897	107	164	133
2101	ESRRA	10340906	91.7435	4.173	0.918818	99.8494	12.6618	124.281	11.8716	107	164	133
2101	ESRRA	10315319	88.3962	3.39773	0.833829	106.012	7.54081	148.394	7.062	107	164	133
2109	ETFB	10337884	159.192	4.0332	1.55181	102.585	5.37953	162.45	16.2735	30	59	51
2109	ETFB	10333219	104.876	8.47754	1.15673	90.6654	8.53955	94.6885	15.5769	30	59	51
2109	ETFB	10325460	91.3487	4.10496	0.92084	99.2015	5.03225	109.532	28.3537	30	59	51
2173	FABP7	10325487	120.057	1.18848	1.2801	93.7871	8.72041	109.229	4.08868	151	86	141
2173	FABP7	10337910	112.772	7.79495	1.25544	89.8267	3.18775	137.878	14.5539	151	86	141
2173	FABP7	10333245	106.943	6.28286	1.08596	98.4779	4.76919	116.647	20.3673	151	86	141
81889	FAHD1	10330437	119.788	4.38845	1.21172	98.8576	3.48725	137.582	27.3978	154	129	161
81889	FAHD1	10342903	115.648	7.20669	1.0455	110.615	6.09713	122.256	16.8973	154	129	161
81889	FAHD1	10322775	77.7011	1.01464	0.826334	94.0312	1.86968	215.575	50.6727	154	129	161
10922	FASTK	10329072	205.604	27.6803	2.37331	86.6318	8.43257	111.866	10.6966	9	18	7
10922	FASTK	10323994	102.977	6.48231	1.08277	95.1049	8.45217	114.24	26.2446	9	18	7
10922	FASTK	10321406	92.5388	7.28696	0.978814	94.5418	4.43393	159.074	25.3726	9	18	7
2204	FCAR	10337927	144.143	6.60162	1.48417	97.1202	6.91566	133.228	11.0901	61	109	74
2204	FCAR	10333261	88.3927	3.58077	1.02784	85.9988	7.13735	86.3289	10.1666	61	109	74
2204	FCAR	10325504	60.9469	5.83255	0.636973	95.6821	1.03349	77.7103	10.9396	61	109	74
2235	FECH	10337941	124.648	6.88141	1.27795	97.5373	4.62292	91.4473	18.6867	130	179	142
2235	FECH	10333276	105.754	2.6817	1.03414	102.263	3.7996	124.539	10.2152	130	179	142
2235	FECH	10325518	96.7491	6.69285	1.00612	96.1606	1.96675	95.5842	8.12696	130	179	142
2280	FKBP1A	10325523	140.687	35.8777	1.40977	99.7946	3.49605	122.356	8.10304	74	133	96
2280	FKBP1A	10333281	102.47	4.11956						74	133	96
2280	FKBP1A	10337946	80.3097	2.21889	0.870663	92.2396	1.64875	82.9826	12.3049	74	133	96
55640	FLVCR2	10323431	127.609	19.538	1.29692	98.3939	2.3118	91.1075	12.4982	114	151	135
55640	FLVCR2	10319890	111.365	0.335027	1.16562	95.5414	3.38424	121.008	25.2601	114	151	135
55640	FLVCR2	10329714	99.7892	9.45094	1.04791	95.2269	3.08482	87.6537	11.8978	114	151	135
2475	FRAP1	10331617	108.419	3.19988	1.209	89.6768	4.58481	123.21	20.1223	200	216	163
2475	FRAP1	10248042	99.0035	6.4863	0.97201	101.854	3.99764	163.592	1.52207	200	216	163
2475	FRAP1	10339567	80.9262	7.84045	0.958467	84.4329	8.11887	138.376	40.8818	200	216	163
2519	FUCA2	10325402	121.985	7.35443	1.24019	98.3599	8.43683	135.585	23.6967	142	113	143
2519	FUCA2	10337825	104.66	6.79047	1.16525	89.8182	12.3843	101.817	19.636	142	113	143
2519	FUCA2	10332987	104.447	5.4325	1.27585	81.8651	14.9379	118.414	15.9004	142	113	143
2563	GABRD	10341317	111.495	7.70019	1.13293	98.4135	4.91671	122.458	17.2879	187	188	181
2563	GABRD	10314363	108.421	10.2127	1.18083	91.8177	9.67318	101.981	2.10634	187	188	181
2563	GABRD	10317375	90.7669	6.44203	1.03186	87.9644	5.21815	149.658	22.5362	187	188	181
2581	GALC	10337837	141.038	3.25307	1.44664	97.4937	2.34647	111.506	2.83968	71	61	80
2581	GALC	10332999	115.91	7.9326	1.12391	103.131	5.99537	85.4466	16.5486	71	61	80
2581	GALC	10325414	109.832	1.91959	1.04105	105.502	7.81228	113.417	24.7602	71	61	80
79623	GALNT14	10322947	123.696	9.44547	1.06831	115.787	5.8713	92.3331	10.8919	136	171	169
79623	GALNT14	10330608	110.775	9.17503	1.20215	92.1469	2.51929	152.816	41.9748	136	171	169
79623	GALNT14	10320785	95.1156	7.61435	0.891155	106.733	3.94541	100.433	22.0589	136	171	169
8811	GALR2	10342754	107.236	10.863	0.95528	112.256	2.08615	106.111	12.5854	205	204	216
8811	GALR2	10314994	104.004	4.26879	1.03669	100.323	13.3657	84.7802	14.9363	205	204	216
8811	GALR2	10318010	87.9951	4.03357	0.83737	105.085	5.21253	117.278	20.0283	205	204	216
2643	GCH1	10325444	127.403	3.16201	1.3417	94.9563	2.98222	113.657	12.2711	116	65	119
2643	GCH1	10333029	124.165	10.6831	1.2703	97.7449	1.91904	99.9655	15.6436	116	65	119
2643	GCH1	10337868	96.9371	7.41042	0.976563	99.2635	8.47798	86.3372	21.9136	116	65	119
2669	GEM	10333038	140.899	12.763	1.7398	80.986	6.10879	191.532	8.48146	73	132	31
2669	GEM	10337356	93.5135	2.51065	0.943258	99.1389	6.14888	108.097	21.624	73	132	31
2669	GEM	10325278	83.827	5.92123	1.0279	81.5519	2.28768	190.918	37.3167	73	132	31
2677	GGCX	10333045	141.191	7.57179	1.53683	91.8716	10.4055	126.683	13.2506	69	125	57
2677	GGCX	10325285	109.397	11.4313	1.08997	100.367	3.77066	115.024	14.5807	69	125	57
2677	GGCX	10337363	92.2675	7.92218	0.956478	96.4659	5.82515	108.68	8.25272	69	125	57
57165	GJC2	10336235	157.795	7.71831	1.6671	94.6525	3.70258	127.608	4.1064	32	64	39
57165	GJC2	10339940	109.879	8.31093	1.11685	98.383	8.17092	110.223	10.8783	32	64	39
57165	GJC2	10327581	105.799	0.86787	1.0437	101.369	5.22407	104.317	4.25925	32	64	39
29925	GMPPB	10321976	127.196	4.5661	1.31846	96.4735	3.66634	201.055	51.4497	117	174	125
29925	GMPPB	10329040	103.642	13.0622	1.03468	100.169	6.16208	119.467	6.44226	117	174	125
29925	GMPPB	10324212	84.292	6.78446	0.849829	99.187	3.73839	104.822	4.20291	117	174	125
23432	GPR161	10316151	127.003	12.6275	1.54817	82.0341	8.46296	120.092	24.8241	118	52	52
23432	GPR161	10318220	126.401	13.0529	1.26337	100.051	8.64996	210.634	47.9989	118	52	52
23432	GPR161	10342627	108.348	1.90897	1.10324	98.2089	6.35877	159.157	18.7631	118	52	52
11245	GPR176	10316143	154.439	20.9713	1.57235	98.2219	5.98285	159.958	34.5928	37	24	47
11245	GPR176	10318212	120.724	9.62329	1.17807	102.477	5.36265	88.5635	9.07371	37	24	47
11245	GPR176	10342619	115.51	0.780735	1.1633	99.295	6.03905	96.6965	6.61519	37	24	47
2932	GSK3B	10331395	106.872	3.0893	1.14552	93.2958	3.5759	138.436	27.8562	206	220	160
2932	GSK3B	10338993	76.2921	1.94699	1.22267	62.398	23.9318	278.306	110.223	206	220	160
2932	GSK3B	10326307	58.1123	2.2329	0.627718	92.577	4.28585	102.217	8.99823	206	220	160
9931	HELZ	10324583	117.049	4.82677	1.07056	109.334	3.45235	87.1609	4.69498	164	47	185
9931	HELZ	10338738	116.573	8.2152	1.07981	107.957	4.68283	105.065	14.4984	164	47	185
9931	HELZ	10316433	111.607	9.3291	1.16919	95.4571	6.62313	124.155	12.7491	164	47	185
81502	HM13	10318599	118.226	10.3349	1.098	107.674	8.05274	86.1501	5.99605	160	143	207
81502	HM13	10314048	104.056	2.08861	1.02246	101.77	3.09479	118.044	17.833	160	143	207
81502	HM13	10331920	101.35	4.96951	1.05436	96.1246	2.92449	74.5456	11.5581	160	143	207
9953	HS3ST3B1	10338754	183.068	10.823	1.90389	96.1551	7.36334	149.028	12.0335	15	36	16
9953	HS3ST3B1	10316449	107.36	9.20713	1.30572	82.2228	10.3516	321.07	93.6373	15	36	16
9953	HS3ST3B1	10324599	101.16	11.396	1.08327	93.3837	5.38685	128.24	4.01295	15	36	16
374875	HSD11B1L	10319537	126.578	13.0042	1.37286	92.2001	8.45598	183.603	51.9386	120	177	104
374875	HSD11B1L	10341945	108.476	4.38336	0.986476	109.964	3.67024	116.115	4.01346	120	177	104
374875	HSD11B1L	10313154	82.5581	1.11503	0.934447	88.3496	6.03588	200.161	60.0223	120	177	104
55699	IARS2	10319907	132.965	10.385	1.4438	92.0938	9.10022	95.1499	19.6038	98	60	83
55699	IARS2	10329731	124.734	13.0336	1.15385	108.102	5.47863	107.962	3.7868	98	60	83
55699	IARS2	10323448	99.6966	10.4689	0.97218	102.549	4.56189	121.283	13.2827	98	60	83
3384	ICAM2	10326129	119.213	3.64571	1.20455	98.9689	4.12972	85.9839	7.6692	155	147	166
3384	ICAM2	10332936	102.582	3.5358	1.02554	100.027	6.79368	135.603	32.4884	155	147	166
3384	ICAM2	10337601	100.742	3.54048	0.967045	104.175	1.96276	100.509	21.8893	155	147	166
3597	IL13RA1	10332643	118.526	17.0101	1.11075	106.708	5.83458	122.648	26.5687	158	127	120
3597	IL13RA1	10337480	115.799	1.02826	1.33815	86.5368	2.79726	78.9835	22.5615	158	127	120
3597	IL13RA1	10326010	94.5578	10.2343	0.953049	99.2162	1.9716	137.7	22.0905	158	127	120
23765	IL17RA	10328579	143.508	15.4102	1.51006	95.0348	5.95508	211.956	17.5322	64	116	66
23765	IL17RA	10321087	114.331	5.00349	1.10124	103.82	5.5789	101.613	3.00829	64	116	66
23765	IL17RA	10323847	93.5446	3.68334	0.928809	100.715	3.25031	109.809	11.2974	64	116	66
3635	INPP5D	10342120	106.808	6.95104	1.09618	97.4367	5.68681	111.018	13.8212	207	194	208
3635	INPP5D	10315629	97.8558	7.10305	1.02727	95.2581	2.30127	113.544	9.76691	207	194	208
3635	INPP5D	10319404	94.0629	3.28511	0.897122	104.85	4.51697	105.391	18.2983	207	194	208
56623	INPP5E	10319209	140.068	10.4558	1.46637	95.5206	0.885342	112.331	8.50073	77	74	76
56623	INPP5E	10342269	123.038	12.23	1.23809	99.3774	5.82495	121.92	11.4671	77	74	76
56623	INPP5E	10315778	85.7026	10.94	0.911057	94.0694	5.84837	103.362	10.3793	77	74	76
3688	ITGB1	10338401	123.913	12.5774	1.41278	87.7084	2.9797	145.328	13.9175	134	187	94
3688	ITGB1	10325893	107.687	7.63333	1.23671	87.0751	8.43298	115.494	14.6059	134	187	94
3688	ITGB1	10332700	90.0837	2.5669	1.0458	86.1386	1.4276	201.076	25.8113	134	187	94
3728	JUP	10325904	97.4608	2.92138	1.02558	95.0297	4.64426	140.943	13.7449	222	213	218
3728	JUP	10332711	88.9291	9.95513	0.96475	92.1784	5.37985	127.036	11.4306	222	213	218
3728	JUP	10338412	82.7707	7.84614	0.851084	97.2533	5.29287	106.834	26.533	222	213	218
3752	KCND3	10314406	133.657	1.08953	1.45809	91.6657	2.83532	196.543	43.4982	96	63	77
3752	KCND3	10317246	124.374	36.1797	1.44135	86.2902	10.9082	114.326	7.91318	96	63	77
3752	KCND3	10341192	109.063	4.64344	1.13752	95.8775	1.8271	119.015	18.0592	96	63	77
81033	KCNH6	10341350	146.485	29.1734	1.5369	95.312	3.87673	125.436	28.6209	53	97	56
81033	KCNH6	10317059	108.253	4.68887	1.18117	91.649	3.04245	150.945	16.0785	53	97	56
81033	KCNH6	10314570	103.695	9.21434	1.015	102.162	7.21441	87.5366	5.07563	53	97	56
10089	KCNK7	10314605	130.899	9.46812	1.45665	89.8628	5.48057	215.597	76.9458	103	152	78
10089	KCNK7	10317095	112.712	12.5187	1.13037	99.7128	5.63169	127.14	13.2142	103	152	78
10089	KCNK7	10341384	92.3458	1.16172	0.954344	96.7637	1.86874	89.2183	17.2753	103	152	78
79734	KCTD17	10341348	99.6119	5.96177	1.15498	86.2454	7.72458	187.526	29.8808	218	218	190
79734	KCTD17	10317057	97.407	12.4159	1.0779	90.367	8.0897	121.967	1.15155	218	218	190
79734	KCTD17	10314568	78.6722	13.3768	0.863094	91.1513	13.2125	202.933	61.4348	218	218	190
23510	KCTD2	10341471	156.41	8.57387	1.69271	92.4022	4.86231	77.7971	1.07446	35	71	36
23510	KCTD2	10317183	106.446	7.92684	1.0331	103.035	5.67592	99.6905	18.1763	35	71	36
23510	KCTD2	10314518	93.479	4.83483	0.973868	95.9873	8.23631	159.722	30.45	35	71	36
11015	KDELR3	10321203	116.143	1.91475	1.15924	100.189	4.30294	107.302	6.63171	169	169	172
11015	KDELR3	10324992	110.778	11.3952	1.19214	92.924	1.97185	112.896	29.5039	169	169	172
11015	KDELR3	10328522	93.5797	3.58727	0.936643	99.9097	8.87258	165.738	54.5089	169	169	172
9817	KEAP1	10340583	288.869	29.4453	2.78077	103.881	7.21235	157.1	19.7772	3	1	3
9817	KEAP1	10327784	271.414	36.0877	2.9124	93.1923	4.26569	115.865	9.43078	3	1	3
9817	KEAP1	19864	104.766	2.54426	1.0099	103.739	7.31933	96.5927	18.3586	3	1	3
23046	KIF21B	10320873	131.948	25.5893	1.36004	97.0174	4.77396	174.906	38.4512	100	157	107
23046	KIF21B	10324490	107.693	3.25632	1.1158	96.516	2.50884	100.006	8.95791	100	157	107
23046	KIF21B	10328366	97.4645	3.87554	0.999538	97.5096	1.70086	122.37	15.6554	100	157	107
90990	KIFC2	10313257	110.73	7.42497	1.14196	96.9651	5.94897	108.161	11.7346	192	210	153
90990	KIFC2	10330706	101.969	5.73592	1.2481	81.6989	6.06408	139.277	9.87617	192	210	153
90990	KIFC2	10343174	85.805	5.34089	0.851044	100.823	4.96718	112.541	16.6526	192	210	153
83746	L3MBTL2	10327369	134.481	1.00102	1.38197	97.3117	2.66888	102.713	14.083	91	43	102
83746	L3MBTL2	10340432	112.805	4.4624	1.26565	89.1283	7.57349	188.564	37.6189	91	43	102
83746	L3MBTL2	10336023	111.94	6.99389	1.21285	92.2947	4.55792	131.256	13.9781	91	43	102
10859	LILRB1	10324927	121.982	3.68121	1.3482	90.4777	5.62131	145.141	27.1962	143	193	115
10859	LILRB1	10328457	107.785	16.5765	1.17132	92.0204	10.248	116.276	44.549	143	193	115
10859	LILRB1	10321138	84.42	4.72038	0.830097	101.699	4.99554	117.412	14.4431	143	193	115
80059	LRRTM4	10330692	112.793	1.83047	1.1868	95.0392	5.63467	94.4766	6.31286	183	166	150
80059	LRRTM4	10342984	111.337	7.95287	1.25409	88.7793	16.0957	111.466	2.14023	183	166	150
80059	LRRTM4	10322857	81.8041	8.70011	0.849496	96.2972	8.26921	134.882	17.8233	183	166	150
11313	LYPLA2	10328277	105.163	8.60446	1.04227	100.898	5.99375	104.889	6.16462	209	211	192
11313	LYPLA2	10321391	101.773	7.77782	1.15023	88.4808	6.57999	127.85	29.568	209	211	192
11313	LYPLA2	10324921	83.5643	1.3528	0.868722	96.1922	6.09776	146.166	12.944	209	211	192
4074	M6PR	10338374	151.49	9.11562	1.70026	89.098	2.34057	173.473	29.4323	42	82	33
4074	M6PR	10332497	111.742	3.75111	1.07282	104.158	4.65134	155.941	8.49322	42	82	33
4074	M6PR	10316592	98.5777	5.18422	0.936218	105.294	5.17812	89.18	28.8587	42	82	33
225689	MAPK15	10329536	148.788	7.75804	1.5523	95.8499	6.88373	123.455	5.25434	46	85	50
225689	MAPK15	10323257	101.366	8.36581	0.965433	104.995	1.64941	92.7041	11.2498	46	85	50
225689	MAPK15	10321614	83.3046	9.11691	0.906875	91.859	6.16987	123.693	6.11242	46	85	50
23162	MAPK8IP3	10324352	144.281	4.35269	1.58577	90.985	9.98752	77.3347	6.69935	59	104	46
23162	MAPK8IP3	10320909	112.676	7.35381	1.13809	99.0046	3.57197	93.9097	10.89	59	104	46
23162	MAPK8IP3	10328749	101.394	3.34525	1.04267	97.2443	4.3672	90.7254	25.9714	59	104	46
10299	MARCH6	10316937	105.46	8.57674	1.0386	101.54	0.943034	115.104	10.7458	208	122	215
10299	MARCH6	10338718	104.269	10.9916	1.0034	103.916	2.99578	104.807	4.39059	208	122	215
10299	MARCH6	10324563	103.311	16.7969	0.907221	113.876	3.4129	164.498	9.79408	208	122	215
2011	MARK2	10339481	120.469	8.09987	1.27387	94.569	6.52589	169.674	10.2803	148	112	145
2011	MARK2	10331366	116.918	5.23484	1.18857	98.3688	3.6914	97.4364	7.14291	148	112	145
2011	MARK2	10326446	96.5548	4.46481	0.962483	100.318	1.26065	121.275	7.05222	148	112	145
4249	MGAT5	10316653	213.493	16.7163	2.68182	79.6075	5.95089	140.639	16.2634	6	13	4
4249	MGAT5	10338610	111.03	7.14164	1.11028	100.002	0.975541	109.195	25.0286	6	13	4
4249	MGAT5	10332558	102.636	11.8521	1.02604	100.031	1.67157	106.736	16.1577	6	13	4
2872	MKNK2	10331401	136.9	3.91275	1.3521	101.25	8.00884	114.995	4.86088	85	135	113
2872	MKNK2	10338999	109.255	3.51844	1.03134	105.934	1.57947	109.097	12.5328	85	135	113
2872	MKNK2	10326313	102.467	2.85604	0.987517	103.762	4.61162	147.2	17.299	85	135	113
4350	MPG	10332591	139.921	7.22284	1.44303	96.9631	10.0386	131.793	14.0547	78	114	84
4350	MPG	10316686	116.731	8.96714	1.10016	106.104	0.896245	93.9536	20.9724	78	114	84
4350	MPG	10338643	104.057	5.85592	1.07054	97.2007	5.55195	122.855	10.4309	78	114	84
4439	MSH5	10332255	114.503	1.5436	1.14697	99.8315	3.23644	129.568	47.7038	178	160	193
4439	MSH5	10338481	107.889	4.67803	1.13829	94.7819	2.23677	127.097	7.34946	178	160	193
4439	MSH5	10316700	98.8741	7.77913	0.958547	103.15	4.06321	108.81	19.0114	178	160	193
22921	MSRB2	10324452	104.922	5.07392	1.0931	95.9861	2.02864	101.858	16.6409	210	207	209
22921	MSRB2	10320835	102.847	2.45191	0.986091	104.298	8.63918	148.475	36.114	210	207	209
22921	MSRB2	10328327	83.0218	2.79989	0.824	100.755	3.29017	140.461	35.5749	210	207	209
63915	MUTED	10330087	122.358	10.9982	1.23821	98.8188	3.42953	142.492	14.8915	140	88	154
63915	MUTED	10320609	119.731	7.68714	1.20681	99.2127	5.7727	101.687	5.66701	140	88	154
63915	MUTED	10322424	103.384	14.7629	1.05216	98.2585	5.40228	103.342	18.7314	140	88	154
63908	NAPB	10336283	144.259	9.33544	1.3702	105.284	5.32816	108.202	20.8983	60	107	105
63908	NAPB	10339812	112.49	11.4222	1.33627	84.1818	3.95257	171.778	40.1967	60	107	105
63908	NAPB	10327453	104.717	20.6072	1.02268	102.394	6.55898	91.0096	19.0914	60	107	105
4688	NCF2	10338559	130.867	28.1694	1.44221	90.7407	6.60602	178.62	39.1736	104	161	86
4688	NCF2	10332333	110.028	10.3136	1.08818	101.113	4.77775	108.044	2.83362	104	161	86
4688	NCF2	10316778	94.3184	4.97956	0.963455	97.896	5.44297	85.2372	14.4954	104	161	86
8648	NCOA1	10334257	187.968	21.8192	1.83902	102.211	5.5876	112.7	12.0431	12	28	22
8648	NCOA1	10246191	132.778	10.6889	1.33099	99.7589	1.95317	109.706	9.24658	12	28	22
8648	NCOA1	10327248	100.496	11.6966	0.984053	102.124	4.63545	105.526	7.2145	12	28	22
4696	NDUFA3	10338558	107.719	6.95093	1.32994	80.9952	14.4073	294.089	74.7672	201	209	121
4696	NDUFA3	10332332	100.42	3.27696	0.955167	105.133	3.04923	101.201	12.3892	201	209	121
4696	NDUFA3	10316777	85.8197	1.00272	0.883186	97.1706	3.02665	93.8643	7.32389	201	209	121
4716	NDUFB10	10338065	98.9706	1.48006	0.979486	101.043	4.4409	89.0698	17.5835	220	182	217
4716	NDUFB10	10332358	97.2348	7.25921	1.03211	94.2094	6.31356	103.962	12.4844	220	182	217
4716	NDUFB10	10316802	96.528	6.85398	0.896288	107.698	9.85503	94.4346	16.9345	220	182	217
51199	NIN	10323059	137.672	13.3847	1.4291	96.3349	3.28702	84.2339	11.4213	81	40	92
51199	NIN	10329336	129.998	2.15539	1.35763	95.7535	3.0167	126.889	46.637	81	40	92
51199	NIN	10320205	97.422	7.99922	0.923858	105.451	0.178449	104.735	42.3521	81	40	92
4833	NME4	10331429	116.883	9.39953	1.17465	99.5047	2.05699	90.6021	14.448	165	77	158
4833	NME4	10326341	113.191	11.8628	1.16937	96.7967	6.54212	137.706	17.5263	165	77	158
4833	NME4	10339029	108.34	2.41688	1.22966	88.1058	3.86592	193.525	41.6936	165	77	158
4884	NPTX1	10334725	128.203	4.50704	1.15012	111.469	4.03931	113.074	9.11514	112	130	188
4884	NPTX1	10339989	115.579	3.67123	1.1584	99.7745	3.17465	117.114	20.2244	112	130	188
4884	NPTX1	10335932	90.9096	0.895974	1.01366	89.6842	16.1533	141.947	34.7732	112	130	188
83714	NRIP2	10314059	147.336	4.33096	1.42987	103.042	3.32383	164.903	20.546	49	72	89
83714	NRIP2	10318610	123.575	5.63114	1.26934	97.3538	8.76489	140.425	31.4847	49	72	89
83714	NRIP2	10331931	90.3434	10.0418	0.965483	93.5732	4.29429	83.9352	8.80393	49	72	89
4946	OAZ1	10332188	164.086	19.8801	1.53978	106.565	2.95255	207.793	40.7007	27	23	55
4946	OAZ1	10337984	137.905	3.49312	1.33907	102.986	2.16481	101.439	18.0492	27	23	55
4946	OAZ1	10316198	96.2713	9.77309	1.03491	93.0236	4.99605	227.598	30.3786	27	23	55
51686	OAZ3	10329432	124.249	6.92324	1.34717	92.2299	2.65176	94.1052	30.7501	132	105	117
51686	OAZ3	10323665	117.173	11.4412	1.23502	94.8759	6.0283	166.667	19.299	132	105	117
51686	OAZ3	10320301	94.8237	5.13748	0.951739	99.632	3.55567	115.27	21.4189	132	105	117
55644	OSGEP	10318738	128.584	7.72848	1.41063	91.1542	3.27744	106.358	17.732	111	168	95
55644	OSGEP	10314014	106.76	4.01702	1.06908	99.8621	2.7625	94.3645	10.0005	111	168	95
55644	OSGEP	10331886	94.8403	5.89054	1.0702	88.6192	0.626527	102.012	29.1087	111	168	95
5033	P4HA1	10316228	149.09	11.8709	1.55251	96.0316	6.1269	105.565	12.9513	44	83	49
5033	P4HA1	10332218	118.162	18.1685	1.08837	108.568	4.73389	114.143	19.0871	44	83	49
5033	P4HA1	10338014	97.4277	1.93572	0.932075	104.528	10.7255	90.6201	7.48938	44	83	49
23022	PALLD	10324482	114.261	12.3914	1.08832	104.988	3.33599	106.161	24.6749	179	201	210
23022	PALLD	10320865	96.8016	7.95433	1.02409	94.5247	11.1277	103.913	11.4256	179	201	210
23022	PALLD	10328357	91.9015	4.83568	0.944746	97.2764	7.4012	103.227	7.57178	179	201	210
55486	PARL	10314004	117.908	10.2197	1.30628	90.2624	7.74205	133.722	37.9154	161	156	131
55486	PARL	10318728	111.908	10.2308	1.23879	90.3361	2.9141	198.34	48.7939	161	156	131
55486	PARL	10331876	50.9444	5.75015	0.554711	91.8395	2.55014	128.506	11.7278	161	156	131
54510	PCDH18	10329871	167.974	1.24921	1.75154	95.9005	19.1848	313.569	55.2334	23	7	26
54510	PCDH18	10320393	139.251	10.6238	1.3597	102.413	4.42099	119.107	25.3943	23	7	26
54510	PCDH18	10323585	121.285	9.68965	1.22903	98.6831	0.222905	110.312	10.7785	23	7	26
5129	PCTK3	10331444	119.048	0.79473	1.11061	107.191	3.02453	109.671	14.0744	156	106	197
5129	PCTK3	10326356	107.122	7.88708	1.13505	94.3763	0.924338	92.5323	20.4743	156	106	197
5129	PCTK3	10339044	104.763	1.41167	1.04046	100.689	4.39786	124.207	11.0397	156	106	197
5195	PEX14	10315862	126.472	5.35884	1.19089	106.199	7.20371	132.95	15.857	121	54	173
5195	PEX14	10319119	126.08	2.80281	1.15522	109.14	12.2058	97.1312	31.5174	121	54	173
5195	PEX14	10342180	89.0294	7.99788	0.882013	100.939	1.31069	120.799	7.02844	121	54	173
5190	PEX6	10315867	147.256	12.9114	1.69378	86.9389	5.36782	158.753	27.5313	50	15	35
5190	PEX6	10342185	143.087	10.7838	1.45947	98.0399	5.25139	106.405	6.94336	50	15	35
5190	PEX6	10319124	84.6549	6.25284	0.883778	95.7876	3.75649	137.439	21.2725	50	15	35
84547	PGBD1	10327389	107.478	12.5049	1.11024	96.8063	6.36506	112.34	14.8742	203	165	204
84547	PGBD1	10336043	98.9639	4.64402	0.970333	101.99	5.57801	103.121	12.1098	203	165	204
84547	PGBD1	10340452	98.1136	4.30924	1.05777	92.7548	11.5964	104.887	25.7219	203	165	204
5251	PHEX	10319143	174.206	2.89051	1.9898	87.5496	4.1297	143.454	3.54496	18	39	14
5251	PHEX	10342203	118.893	5.96679	1.43567	82.8139	8.48978	133.848	18.7167	18	39	14
5251	PHEX	10315885	101.495	4.58709	1.04146	97.4542	8.65254	88.0097	4.25588	18	39	14
5300	PIN1	10342226	112.86	26.5949	1.22046	92.4737	3.6324	92.4716	12.5385	182	155	97
5300	PIN1	10315909	112.197	6.71265	1.40759	79.7088	18.6835	93.2639	9.10031	182	155	97
5300	PIN1	10319166	98.3609	2.04709	1.00606	97.7681	3.50238	122.074	37.7156	182	155	97
5331	PLCB3	10315918	111.146	2.13199	1.14032	97.469	8.03321	86.5725	2.34743	189	196	195
5331	PLCB3	10342235	95.6859	2.45757	1.00146	95.5466	1.65806	86.9761	6.7828	189	196	195
5331	PLCB3	10319175	92.8262	0.683752	0.948648	97.8511	6.88673	140.754	35.8629	189	196	195
9651	PLCH2	10324688	210.613	12.625	2.14532	98.1735	1.92159	150.986	35.5477	7	14	10
9651	PLCH2	10246408	143.153	12.13	1.39722	102.456	6.61156	114.389	12.7512	7	14	10
9651	PLCH2	10246409	71.9715	5.82234	0.81146	88.6938	6.28961	103.238	6.17636	7	14	10
23228	PLCL2	10320932	133.988	18.8881	1.37956	97.1235	6.6444	107.347	2.27344	93	98	15
23228	PLCL2	10324376	114.501	8.04976	1.98686	57.629	23.1068	149.362	58.8813	93	98	15
23228	PLCL2	10328773	105.726	3.62259	1.07782	98.0927	0.889229	121.847	21.2337	93	98	15
23646	PLD3	10328553	146.751	10.2876	1.5963	91.9321	1.96262	119.28	15.5211	52	95	45
23646	PLD3	10321061	117.617	9.89657	1.20259	97.8026	5.82121	107.761	16.09	52	95	45
23646	PLD3	10323821	94.9003	5.89593	1.01544	93.4574	12.554	120.779	42.7841	52	95	45
5347	PLK1	10242429	100.854	8.2305	1.2863	78.4063	7.07957	582.909	69.1202	216	221	28
5347	PLK1	10242438	83.3069	5.57918	1.5962	52.1907	6.24212	1004.29	203.816	216	221	28
5347	PLK1	10242428	72.5934	10.2324	1.75098	41.4587	8.33427	1086.31	99.0494	216	221	28
5426	POLE	10342786	109.408	4.86253	1.15237	94.9417	3.63679	97.8918	4.83656	195	214	191
5426	POLE	10315026	97.7928	4.70309	1.05406	92.7772	5.60458	86.6498	3.66387	195	214	191
5426	POLE	10318043	82.6465	11.7965	0.947856	87.1931	10.2227	148.757	14.9115	195	214	191
10622	POLR3G	10325049	126.13	3.78182	1.27032	99.2901	4.35723	114.182	17.5849	125	103	112
10622	POLR3G	10321259	117.402	4.18763	1.29003	91.0071	7.46715	94.3298	9.37246	125	103	112
10622	POLR3G	10328405	103.48	8.32195	1.35279	76.4937	6.49244	274.41	24.4749	125	103	112
10585	POMT1	10321235	115.414	4.59994	1.17562	98.1731	8.88386	113.708	16.3842	173	150	182
10585	POMT1	10325025	106.822	6.45803	1.11532	95.7778	3.77162	141.932	10.1668	173	150	182
10585	POMT1	10328381	100.36	10.4494	1.00897	99.4677	1.22128	97.9101	6.93069	173	150	182
8500	PPFIA1	10336794	134.565	12.5861	1.31557	102.286	5.27387	97.9665	3.75437	90	124	127
8500	PPFIA1	10326192	110.13	3.92552	1.08428	101.569	0.815532	117.336	3.58515	90	124	127
8500	PPFIA1	10334211	103.185	7.06478	1.02381	100.786	8.11072	125.787	28.7807	90	124	127
5511	PPP1R8	10319429	173.458	31.4488	1.80177	96.2707	2.83627	142.437	13.4182	20	4	24
5511	PPP1R8	10342146	134.66	6.06307	1.25686	107.14	4.04835	85.5864	10.4098	20	4	24
5511	PPP1R8	10315656	131.452	19.8454	1.36883	96.0323	2.80505	102.232	10.753	20	4	24
26121	PRPF31	10321778	191.723	15.5896	2.0599	93.0739	11.5687	194.098	22.9084	11	27	13
26121	PRPF31	10328671	131.602	14.6332	1.38273	95.1757	3.75434	122.159	2.43782	11	27	13
26121	PRPF31	10323764	109.461	8.1469	1.17441	93.2053	4.74763	150.61	25.4523	11	27	13
5700	PSMC1	10342708	129.026	15.8884	1.65824	77.8087	7.79941	274.443	56.4985	108	22	40
5700	PSMC1	10315121	118.47	8.64034	1.3575	87.2704	3.37334	95.5807	13.836	108	22	40
5700	PSMC1	10317967	115.889	13.4519	1.2632	91.742	5.19199	138.148	8.5484	108	22	40
5701	PSMC2	10342709	174.144	11.3269	2.14259	81.2773	3.75779	148.761	8.98552	19	26	11
5701	PSMC2	10317968	116.98	15.1697	1.254	93.2855	6.92765	86.8634	3.64392	19	26	11
5701	PSMC2	10315122	115.134	8.62211	1.2078	95.3257	7.10089	103.055	7.30025	19	26	11
5704	PSMC4	10342711	120.39	6.72497	1.31889	91.2807	2.0388	138.011	17.3646	149	51	124
5704	PSMC4	10317970	112.623	11.9186	1.18339	95.1703	6.56328	98.7448	14.559	149	51	124
5704	PSMC4	10315124	111.1	5.8269	1.12508	98.7486	0.487227	107.53	28.3328	149	51	124
5708	PSMD2	10317975	137.405	0.696182	1.48682	92.4154	2.45602	137.198	9.49983	82	90	73
5708	PSMD2	10315129	118.898	5.31435	1.31267	90.5771	1.4889	146.092	15.0796	82	90	73
5708	PSMD2	10342716	85.3573	4.25543	0.966987	88.2714	4.03768	195.605	54.2436	82	90	73
9861	PSMD6	10324749	148.789	5.56484	1.54142	96.5274	3.03048	123.803	2.88247	45	29	54
9861	PSMD6	10338207	122.316	2.93157	1.26595	96.6193	6.65837	98.9955	20.3898	45	29	54
9861	PSMD6	10316423	114.213	6.07653	1.12299	101.705	1.94727	88.7144	13.369	45	29	54
5783	PTPN13	10341998	127.604	4.13947	1.2903	98.8949	7.22279	171.793	35.766	115	44	137
5783	PTPN13	10315676	114.906	4.95444	1.26311	90.971	0.811509	122.09	13.3749	115	44	137
5783	PTPN13	10319279	111.841	4.28714	1.12439	99.4676	2.44507	130.332	45.2855	115	44	137
5817	PVR	10317988	122.829	10.367	1.18951	103.26	6.78645	127.007	0.746187	138	158	174
5817	PVR	10315142	111.828	2.35187	1.10935	100.805	0.987052	73.179	9.3642	138	158	174
5817	PVR	10342729	80.058	10.2715	0.810293	98.8014	5.3492	135.108	28.8433	138	158	174
9364	RAB28	10334150	140.514	9.70805	1.68299	83.4908	6.94337	145.216	56.4971	75	134	37
9364	RAB28	10339760	112.722	17.9312	1.09539	102.906	3.90096	129.32	19.9418	75	134	37
9364	RAB28	10327139	99.5236	6.2969	0.956614	104.037	1.59417	94.1609	1.43837	75	134	37
11021	RAB35	10328535	111.61	0.621343	1.1568	96.4816	3.96205	215.85	19.9337	186	148	189
11021	RAB35	10325005	110.185	20.1659	1.14083	96.5836	4.58992	109.112	13.1457	186	148	189
11021	RAB35	10321216	100.532	5.66883	0.986993	101.857	3.02071	156.21	17.6377	186	148	189
11020	RABL4	10321215	141.697	29.4417	1.56305	90.6542	6.65131	163.636	19.4373	66	120	48
11020	RABL4	10325004	113.212	6.21657	1.23911	91.3655	2.38222	128.348	14.1492	66	120	48
11020	RABL4	10328534	93.0374	1.18571	0.95291	97.6351	1.45723	119.186	3.93941	66	120	48
5883	RAD9A	10340762	110.029	0.178064	1.07386	102.461	2.83523	153.494	14.0846	194	185	168
5883	RAD9A	10315176	104.415	8.15499	1.02578	101.79	5.13545	91.5014	5.87296	194	185	168
5883	RAD9A	10317848	96.1741	7.58496	1.20373	79.8967	3.72642	339.224	71.4355	194	185	168
57038	RARS2	10330242	101.629	3.17282	1.019	99.7332	2.68501	124.278	18.3398	213	203	220
57038	RARS2	10322579	95.8985	5.69841	0.931327	102.97	2.38502	81.3187	7.02603	213	203	220
57038	RARS2	10320075	89.8615	11.6136	0.914109	98.3051	7.94255	105.029	23.7231	213	203	220
5924	RASGRF2	10315215	102.656	2.817	1.012	101.439	7.10174	103.159	4.60679	212	212	221
5924	RASGRF2	10317887	100.662	3.12822	0.927852	108.489	11.678	89.1654	6.42792	212	212	221
5924	RASGRF2	10340801	82.8997	10.1965	0.903871	91.7163	3.4741	96.5066	10.2877	212	212	221
83937	RASSF4	10322311	134.296	4.64941	1.22543	109.59	2.1496	93.3358	6.1131	92	93	159
83937	RASSF4	10330492	113.318	3.1839	1.12249	100.953	1.29057	93.0303	12.6985	92	93	159
83937	RASSF4	10343134	106.097	3.29826	0.976409	108.66	3.67953	109.042	4.20728	92	93	159
5947	RBP1	10317896	157.137	20.7957	1.44544	108.712	4.36359	124.816	14.5138	34	68	81
5947	RBP1	10340809	110.319	4.71695	1.09429	100.814	4.38534	117.368	0.877894	34	68	81
5947	RBP1	10315223	67.3573	3.64382	0.669625	100.59	3.67489	106.283	9.5282	34	68	81
25898	RCHY1	10321124	141.056	21.7789	1.49403	94.4129	1.93906	116.357	11.135	70	128	69
25898	RCHY1	10328616	110.639	3.54102	1.2255	90.2806	2.73749	158.34	42.9587	70	128	69
25898	RCHY1	10323885	95.4684	7.12799	1.04928	90.9844	2.42637	99.8599	8.78869	70	128	69
5998	RGS3	10340663	146.183	22.0747	1.35819	107.631	6.04066	99.034	13.2663	55	38	67
5998	RGS3	10317751	118.84	6.32597	1.50826	78.793	19.1994	309.604	108.455	55	38	67
5998	RGS3	10315250	112.387	9.6342	1.13154	99.3224	2.31738	125.271	15.103	55	38	67
9628	RGS6	10324683	126.388	9.65076	1.44485	87.4747	11.5421	185.239	48.1962	123	57	82
9628	RGS6	10338144	125.721	12.8681	1.3641	92.164	7.13141	164.965	30.9128	123	57	82
9628	RGS6	10316358	107.714	9.65725	1.14747	93.8708	3.26505	132.519	27.3033	123	57	82
9743	RICS	10324718	126.353	8.65686	1.38765	91.0549	6.80003	136.706	1.49639	124	45	99
9743	RICS	10338177	117.378	11.293	1.22932	95.482	3.45284	131.239	2.34586	124	45	99
9743	RICS	10316392	111.767	2.41703	1.18001	94.7163	2.48622	98.6064	13.4607	124	45	99
390	RND3	10333647	157.921	12.7258	1.90378	82.9511	13.7842	305.445	183.947	31	62	17
390	RND3	10326807	109.181	7.67403	1.27077	85.9174	14.2527	137.432	51.5762	31	62	17
390	RND3	10337186	95.0989	10.5867	0.978385	97.1999	2.07554	135.21	4.34814	31	62	17
6047	RNF4	10335717	130.226	26.1952	1.51679	85.8568	1.63062	156.904	23.4069	105	162	63
6047	RNF4	10340038	110.197	4.99175	1.15002	95.8219	2.77103	113.223	30.0238	105	162	63
6047	RNF4	10334422	97.5803	2.49103	0.872395	111.853	1.28087	104	10.6439	105	162	63
9616	RNF7	10316347	133.723	26.8562	1.29723	103.084	9.3416	144.919	23.2537	95	117	134
9616	RNF7	10338133	116.578	12.0547	1.10724	105.287	10.1794	89.0106	9.62098	95	117	134
9616	RNF7	10324671	101.907	2.20959	1.0411	97.8838	4.3261	115.535	26.5675	95	117	134
4920	ROR2	10339043	143.675	19.2581	1.5056	95.427	2.01457	118.09	23.5692	63	76	68
4920	ROR2	10326355	122.304	14.4433	1.19578	102.28	2.98587	111.835	5.34255	63	76	68
4920	ROR2	10331443	105.7	4.72047	1.188	88.9736	3.18743	92.4371	14.9216	63	76	68
349667	RTN4RL2	10341930	138.135	9.25254	1.31319	105.19	6.17012	117.219	17.1134	80	131	129
349667	RTN4RL2	10319522	115.539	13.0545	1.16175	99.4524	4.27305	116.572	18.8696	80	131	129
349667	RTN4RL2	10313139	77.2489	6.38177	0.86836	88.9596	8.17577	132.137	32.4697	80	131	129
10856	RUVBL2	10328462	165.461	19.9526	1.75119	94.4851	6.59132	123.694	27.7309	24	20	27
10856	RUVBL2	10324931	138.609	11.0469	1.47273	94.1166	3.81971	146.502	13.4258	24	20	27
10856	RUVBL2	10321143	67.1052	0.889747	0.752525	89.1734	2.64045	103.299	15.1395	24	20	27
51128	SAR1B	10329650	127.984	9.5999	1.42928	89.5439	1.53013	95.3821	24.8997	113	172	91
51128	SAR1B	10321726	97.3519	8.40179	1.03937	93.6643	5.53464	116.652	12.2735	113	172	91
51128	SAR1B	10323200	81.0303	3.4885	0.818166	99.039	4.33549	108.126	18.577	113	172	91
54549	SDK2	10323591	146.855	12.9487	1.41367	103.882	8.46914	114.106	19.3905	51	91	93
54549	SDK2	10320400	116.204	5.11021	1.1816	98.3449	3.51061	104.98	21.6884	51	91	93
54549	SDK2	10329877	104.632	7.69557	1.00414	104.201	4.78734	93.2368	15.6347	51	91	93
8436	SDPR	10327862	102.832	8.87649	1.0434	98.5555	1.65044	120.742	14.7675	211	191	214
8436	SDPR	10340485	96.5105	2.01436	1.00172	96.3451	4.51293	108.228	21.175	211	191	214
8436	SDPR	10334957	94.6966	10.595	0.942825	100.439	7.23774	117.228	19.2439	211	191	214
11231	SEC63	10327711	110.557	8.04989	1.12127	98.6002	2.34536	101.289	24.7293	193	140	199
11231	SEC63	10335158	105.41	0.551212	1.08383	97.2569	1.15386	117.716	17.3125	193	140	199
11231	SEC63	10334806	101.575	5.48862	1.04147	97.5301	0.593678	167.71	33.1003	193	140	199
8710	SERPINB7	10327285	125.902	7.14391	1.2671	99.362	2.56781	163.759	19.7645	128	17	146
8710	SERPINB7	10334294	118.797	7.95952	1.22295	97.1397	4.87387	136.922	3.50505	128	17	146
8710	SERPINB7	10339220	116.649	2.5768	1.11963	104.185	1.83965	105.5	8.54983	128	17	146
9739	SETD1A	10338167	124.269	1.25681	1.35874	91.4593	7.85195	132.675	6.13432	131	67	108
9739	SETD1A	10316382	123.886	16.0412	1.22604	101.046	1.86928	116.761	3.48204	131	67	108
9739	SETD1A	10324708	107.186	0.650802	1.06519	100.627	3.76817	89.6352	1.82182	131	67	108
27036	SIGLEC7	10324248	137.174	24.5399	1.31386	104.405	2.80578	127.088	20.1525	83	144	128
27036	SIGLEC7	10328906	101.813	8.37592	0.987008	103.153	4.774	120.24	17.0172	83	144	128
27036	SIGLEC7	10321840	85.4611	6.89533	0.803407	106.373	4.07845	119.338	12.2097	83	144	128
25942	SIN3A	10323892	116.721	6.76799	1.09806	106.298	2.96702	104.889	31.725	166	137	200
25942	SIN3A	10328623	109.938	11.2152	1.11704	98.4186	4.18578	117.535	2.92793	166	137	200
25942	SIN3A	10321131	101.827	4.66166	0.976612	104.266	5.15831	91.3534	15.0319	166	137	200
387700	SLC16A12	10341971	173.322	13.2064	1.85071	93.6518	8.40897	95.167	8.6807	21	48	21
387700	SLC16A12	10313180	104.208	6.50633	1.11965	93.0716	5.04139	90.9296	9.74573	21	48	21
387700	SLC16A12	10319563	82.6598	4.24745	0.92833	89.0415	8.31464	83.3614	13.2967	21	48	21
79085	SLC25A23	10330573	100.861	5.52857	1.02368	98.5278	8.09641	120.159	14.2379	215	205	167
79085	SLC25A23	10320749	91.2956	2.39823	0.993992	91.8474	1.40659	97.6945	10.901	215	205	167
79085	SLC25A23	10322912	88.9142	3.35696						215	205	167
203427	SLC25A43	10341662	108.748	9.27201	1.11279	97.725	1.9584	107.852	25.5639	199	219	202
203427	SLC25A43	10319830	72.1634	4.34035	0.795721	90.6894	6.32172	111.519	9.35642	199	219	202
203427	SLC25A43	10313760	69.0849	7.34172	0.827239	83.5126	5.98406	193.957	59.4222	199	219	202
10998	SLC27A5	10328521	131.876	10.534	1.28889	102.317	4.65842	113.344	23.704	101	42	138
10998	SLC27A5	10321202	129.856	8.3558	1.28885	100.753	4.33524	102.089	12.9966	101	42	138
10998	SLC27A5	10324991	110.729	7.1797	1.11556	99.259	3.02897	128.371	37.7142	101	42	138
347734	SLC35B2	10313138	183.684	17.3522	1.77706	103.364	1.63379	121.171	18.6034	14	34	25
347734	SLC35B2	10319521	81.7984	5.28981	0.835924	97.8538	9.30942	157.539	23.785	14	34	25
347734	SLC35B2	10341929	77.8905	4.35345	0.828543	94.0091	4.55199	98.3085	12.5663	14	34	25
6541	SLC7A1	10315489	99.1501	3.75977	1.0204	97.1682	0.94409	118.337	4.64217	219	163	219
6541	SLC7A1	10317645	98.1876	4.38162	0.988095	99.3706	3.77333	93.6585	13.2436	219	163	219
6541	SLC7A1	10340902	98.1541	4.59474	0.979419	100.217	3.67595	113.629	18.6657	219	163	219
23049	SMG1	10324021	306.541	70.0742	3.26185	93.9779	3.49822	83.6183	14.9956	1	3	2
23049	SMG1	10329100	193.798	19.3925	2.06024	94.0657	3.31832	98.2068	22.8542	1	3	2
23049	SMG1	10321433	127.963	2.9942	1.34205	95.3489	8.67873	91.3949	7.57959	1	3	2
23583	SMUG1	10323973	120.645	8.12656	1.17395	102.768	2.60726	115.183	30.9288	146	180	184
23583	SMUG1	10328879	98.0642	3.69313	0.968795	101.223	1.62572	97.9066	11.9793	146	180	184
23583	SMUG1	10321039	96.7262	11.059	0.996193	97.0958	1.33837	109.278	19.1283	146	180	184
6632	SNRPD1	10341137	144.672	12.6042	1.52733	94.7225	2.14073	108.078	10.6358	58	10	60
6632	SNRPD1	10315555	144.319	19.3097	1.50727	95.7487	8.28706	169.443	76.3673	58	10	60
6632	SNRPD1	10317536	120.198	5.0509	1.21651	98.8055	2.97881	95.9235	17.5628	58	10	60
6633	SNRPD2	10317537	141.021	4.5428	1.38586	101.757	4.24072	108.371	17.087	72	58	100
6633	SNRPD2	10341138	125.36	8.50999	1.36148	92.0767	5.07028	124.704	2.04071	72	58	100
6633	SNRPD2	10315556	103.461	0.328219	0.931913	111.021	8.81135	99.9665	9.77011	72	58	100
23161	SNX13	10328748	116.156	6.01306	1.0829	107.265	6.42076	136.57	19.5015	168	167	211
23161	SNX13	10324351	107.804	5.74327	1.02533	105.141	1.40113	154.776	12.0371	168	167	211
23161	SNX13	10320908	98.0368	4.73915	0.851497	115.135	1.70284	96.2685	7.22277	168	167	211
6647	SOD1	10315559	145.444	9.55927	1.3531	107.489	2.07441	120.104	11.1451	57	101	111
6647	SOD1	10317540	112.629	7.06815	1.13613	99.1335	3.46959	150.107	6.06094	57	101	111
6647	SOD1	10341141	99.6517	15.9688	1.15066	86.6041	2.39768	246.546	14.7244	57	101	111
6654	SOS1	10317547	115.264	13.7569	1.13753	101.329	7.18513	96.4222	9.02131	175	186	194
6654	SOS1	10315566	108.799	3.87308	1.14448	95.0638	5.31742	137.459	19.3638	175	186	194
6654	SOS1	10341148	80.3956	5.14888	0.849553	94.6329	4.11954	110.572	9.55787	175	186	194
6674	SPAG1	10340992	128.903	2.85625	1.26335	102.033	4.00291	127.352	6.14808	110	99	147
6674	SPAG1	10314208	118.463	8.59233	1.20377	98.4094	6.22984	130.327	26.2326	110	99	147
6674	SPAG1	10317389	100.372	10.5892	1.02654	97.7773	3.14733	155.403	50.8716	110	99	147
84926	SPRYD3	10343266	157.394	3.09507	1.53092	102.81	2.46791	92.8964	8.80391	33	66	58
84926	SPRYD3	10322094	122.279	16.8054	1.23789	98.7805	3.68456	88.5191	28.7402	33	66	58
84926	SPRYD3	10330972	99.45	13.6009	1.01106	98.3621	1.86511	121.13	6.3725	33	66	58
9517	SPTLC2	10246522	141.571	3.21104	1.35793	104.255	7.84518	140.842	20.289	68	123	109
9517	SPTLC2	10246523	107.024	4.64455	1.05618	101.332	2.44472	96.9508	5.56354	68	123	109
9517	SPTLC2	10324815	90.8862	8.53308	0.912487	99.6028	5.09029	118.316	23.3735	68	123	109
6781	STC1	10341051	144.006	7.54874	1.47849	97.4011	4.86369	104.805	7.39364	62	56	75
6781	STC1	10314265	110.539	10.6312	1.13694	97.225	3.95789	120.684	12.8862	62	56	75
6781	STC1	10317447	110.241	10.7683	1.13848	96.8315	6.42152	174.599	47.5149	62	56	75
8803	SUCLA2	10327312	111.388	2.99051	1.14046	97.6694	7.96081	108.825	7.51183	188	192	183
8803	SUCLA2	10339247	108.125	9.62947	1.17529	91.9985	9.16503	110.556	12.0771	188	192	183
8803	SUCLA2	10334321	79.5776	18.2267	0.815099	97.6293	5.64943	92.584	6.60649	188	192	183
391365	SULT6B1	10319439	117.166	6.02051	1.11227	105.339	4.83105	136.192	41.2649	163	138	203
391365	SULT6B1	10341844	111.586	8.33666	1.09783	101.642	0.969734	189.462	53.0122	163	138	203
391365	SULT6B1	10313197	101.749	9.62117	1.03688	98.1301	10.179	102.796	15.9233	163	138	203
6839	SUV39H1	10341068	174.299	14.6169	2.06284	84.4946	2.23354	134.244	27.2439	17	37	12
6839	SUV39H1	10314282	120.989	4.58508	1.25862	96.1282	6.06069	128.062	6.54797	17	37	12
6839	SUV39H1	10317464	92.0647	8.92877	0.893448	103.044	5.711	141.843	24.5262	17	37	12
9900	SV2A	10316426	111.844	7.5874	1.20984	92.4455	6.86553	105.741	7.46608	185	181	162
9900	SV2A	10324752	102.714	14.655	1.04375	98.4084	7.08136	131.672	23.8949	185	181	162
9900	SV2A	10338210	96.5601	7.6578	1.01914	94.7465	5.57973	94.1455	13.5717	185	181	162
6895	TARBP2	10342809	141.865	29.4629	1.43565	98.8158	1.63808	104.762	9.21609	65	119	88
6895	TARBP2	10318066	107.211	15.8293	1.09275	98.1113	4.59637	127.453	11.4956	65	119	88
6895	TARBP2	10315049	91.8157	5.10872	0.901306	101.87	7.64464	94.3501	10.7463	65	119	88
4943	TBC1D25	10316197	109.395	0.64196	1.0999	99.4584	2.52555	105.505	9.19967	196	197	206
4943	TBC1D25	10332187	101.622	2.89645	0.945918	107.432	9.31463	139.968	26.1739	196	197	206
4943	TBC1D25	10337983	92.7042	10.6946	0.953337	97.2418	2.26562	123.09	8.26529	196	197	206
7060	THBS4	10315429	114.943	18.3793	1.18342	97.1285	8.83059	169.057	21.5766	176	145	179
7060	THBS4	10317586	108.808	22.8091	1.02903	105.739	5.73583	90.4676	14.3413	176	145	179
7060	THBS4	10340843	100.894	3.04321	1.02065	98.8528	4.01056	81.4358	5.7889	176	145	179
114609	TIRAP	10343428	132.44	11.1223	1.34733	98.2981	2.53014	100.302	11.2481	99	70	116
114609	TIRAP	10330789	113.925	7.96892	1.12849	100.953	5.81651	120.852	37.2067	99	70	116
114609	TIRAP	10313340	108.956	11.3022	1.20341	90.5394	7.73976	145.383	26.7363	99	70	116
11018	TMED1	10328524	116.492	7.01117	1.20465	96.702	4.20654	108.381	10.0603	167	41	165
11018	TMED1	10324994	114.014	3.36331	1.17298	97.2001	3.13426	109.055	24.5957	167	41	165
11018	TMED1	10321205	112.297	4.85893	1.13163	99.2346	2.67799	103.967	3.71512	167	41	165
10430	TMEM147	10316987	133.965	7.41314	1.49193	89.7928	8.98022	83.0612	9.00586	94	96	71
10430	TMEM147	10325134	110.746	3.19146	1.09557	101.085	3.79423	155.041	10.978	94	96	71
10430	TMEM147	10338856	105.856	10.3932	0.997206	106.153	6.64578	143.303	15.6188	94	96	71
8793	TNFRSF10D	10334316	154.479	67.6314	1.51342	102.073	3.87736	127.617	10.7326	36	73	65
8793	TNFRSF10D	10339242	102.514	10.226	1.04565	98.0386	3.00805	112.695	6.72215	36	73	65
8793	TNFRSF10D	10327307	98.814	6.99429	0.942423	104.851	3.22126	102.173	9.84744	36	73	65
3604	TNFRSF9	10337493	136.06	14.9965	1.49003	91.3133	3.66253	91.434	9.95755	86	79	72
3604	TNFRSF9	10326021	109.287	6.27033	1.0501	104.072	10.453	105.474	15.7745	86	79	72
3604	TNFRSF9	10332656	108.039	10.704	1.1461	94.267	1.48418	122.785	25.2948	86	79	72
1861	TOR1A	10333119	163.399	24.062	1.64006	99.6296	6.0963	108.079	3.23921	28	55	43
1861	TOR1A	10325534	109.428	7.06163	1.09688	99.7624	8.39611	94.7471	15.6516	28	55	43
1861	TOR1A	10337610	105.76	15.1419	1.0398	101.712	5.75185	198.444	45.1909	28	55	43
7172	TPMT	10318427	175.014	30.2137	1.86338	93.9233	5.26099	121.681	20.5626	16	19	19
7172	TPMT	10331749	139.17	12.2818	1.77732	78.3035	12.7363	245.143	40.5984	16	19	19
7172	TPMT	10339360	103.869	8.80679	1.08876	95.4009	7.98996	101.1	19.3502	16	19	19
10221	TRIB1	10322077	126.869	10.3067	1.27569	99.4519	6.00775	117.175	32.077	119	175	144
10221	TRIB1	10324143	106.915	11.7961	1.10594	96.6738	7.19805	133.747	21.1767	119	175	144
10221	TRIB1	10329309	88.7736	8.68045	0.937286	94.7134	4.20723	148.437	10.4552	119	175	144
51127	TRIM17	10323199	110.881	3.50615	1.11806	99.1718	6.26227	94.3682	8.20826	191	110	176
51127	TRIM17	10329649	110.362	8.32143	1.18831	92.8728	7.82391	151.56	28.805	191	110	176
51127	TRIM17	10321725	104.616	7.80841	1.11608	93.735	5.18798	97.096	8.46879	191	110	176
51095	TRNT1	10329640	101.291	2.70753	1.06872	94.7776	6.07721	88.2148	17.4128	214	215	212
51095	TRNT1	10323190	99.3604	7.57279	1.01275	98.1095	3.99074	89.3567	15.192	214	215	212
51095	TRNT1	10321716	82.0666	3.5288	0.906368	90.5444	3.53313	139.325	4.77531	214	215	212
7249	TSC2	10339366	227.867	77.1991	2.61198	87.2392	3.22336	167.997	13.9438	5	11	5
7249	TSC2	10331755	111.327	7.11545	1.08268	102.825	6.6922	97.1298	6.37537	5	11	5
7249	TSC2	10318433	105.512	16.8459	1.05233	100.265	2.60265	111.567	17.6761	5	11	5
79042	TSEN34	10322914	122.653	5.19782	1.32465	92.5923	4.14407	77.3871	12.8599	139	170	123
79042	TSEN34	10320751	100.157	7.39807	0.97653	102.564	6.1546	97.7856	9.08213	139	170	123
79042	TSEN34	10330575	97.673	17.2571	1.03227	94.6194	7.79915	155.913	37.8289	139	170	123
79739	TTLL7	10330636	120.027	3.73186	1.23331	97.3211	5.21025	91.7393	14.4105	152	111	157
79739	TTLL7	10322800	115.223	1.44376	1.08017	106.671	1.00766	89.0047	13.0282	152	111	157
79739	TTLL7	10342928	104.536	4.43639	0.964175	108.42	0.754568	108.56	3.94699	152	111	157
7991	TUSC3	10331688	135.206	7.04779	1.39728	96.7637	10.1565	119.508	5.50749	87	146	98
7991	TUSC3	10314164	113.722	19.7586	1.14121	99.6505	6.13961	103.339	8.8407	87	146	98
7991	TUSC3	10318540	82.5305	3.83404	0.832822	99.0974	4.97285	100.661	16.7694	87	146	98
10587	TXNRD2	10325032	131.132	13.1729	1.25782	104.254	1.93993	119.27	8.4371	102	6	103
10587	TXNRD2	10328388	128.755	6.23464	1.37656	93.5344	10.7714	127.654	43.9816	102	6	103
10587	TXNRD2	10321242	122.289	7.54773	1.20424	101.548	0.497216	107.626	10.4079	102	6	103
7323	UBE2D3	10331794	207.482	41.0127	2.34831	88.3535	6.02415	154.763	31.3668	8	16	8
7323	UBE2D3	10339404	116.888	3.00959	1.1659	100.255	3.36325	101.081	1.14674	8	16	8
7323	UBE2D3	10318472	99.604	12.3112	1.06234	93.7589	8.67964	117.509	37.2999	8	16	8
65264	UBE2Z	10322890	107.448	7.53621	1.12612	95.414	1.3758	102.871	4.68773	204	154	198
65264	UBE2Z	10320727	103.792	6.42528	1.02344	101.415	4.41192	101.422	3.63037	204	154	198
65264	UBE2Z	10330551	99.5996	4.85778	1.0398	95.7875	2.84122	118.144	19.1144	204	154	198
7388	UQCRH	10331479	140.15	3.17378	1.51558	92.473	4.5954	89.1413	11.7333	76	136	64
7388	UQCRH	10318323	99.4834	6.28984	1.07208	92.7945	6.81608	126.445	6.57516	76	136	64
7388	UQCRH	10339255	87.5831	3.43048	0.860409	101.792	5.06844	100.755	7.63425	76	136	64
85015	USP45	10314068	125.941	8.87494	1.30326	96.6356	1.74932	132.137	15.9572	127	92	132
85015	USP45	10318619	113.875	4.9046	1.16249	97.9581	1.21571	103.381	5.40519	127	92	132
85015	USP45	10331940	106.226	8.12472	1.10368	96.2468	6.55647	127.201	19.2668	127	92	132
64854	USP46	10318590	112.715	4.63929	1.18109	95.4333	5.34264	104.544	6.35913	184	173	180
64854	USP46	10314039	110.745	18.1796	1.14632	96.6086	5.57532	112.235	8.50924	184	173	180
64854	USP46	10331911	85.7376	3.16459	0.869148	98.6456	5.23917	159.439	27.1435	184	173	180
7874	USP7	10314835	120.084	8.46197	1.31263	91.4836	2.20541	111.129	34.7875	150	84	130
7874	USP7	10332103	119.823	15.066	1.31118	91.3854	5.01859	98.8278	15.2326	150	84	130
7874	USP7	10318783	107.342	11.8867	1.18532	90.5594	5.09048	129.076	18.5505	150	84	130
7415	VCP	10318339	148.105	9.29263	1.54636	95.7761	1.93622	86.542	2.45312	47	50	53
7415	VCP	10331495	113.123	1.54126	1.13416	99.7414	2.83809	134.366	4.32797	47	50	53
7415	VCP	10339271	111.383	6.46212	1.13189	98.4047	4.36141	100.373	7.51058	47	50	53
56949	XAB2	10320062	235.124	73.5534	2.49508	94.2348	4.01761	116.765	12.1166	4	8	6
56949	XAB2	10330230	116.244	4.00435	1.28527	90.4437	2.45837	127.636	13.9036	4	8	6
56949	XAB2	10322567	106.561	4.48673	1.14756	92.8583	5.21735	123.648	20.3073	4	8	6
23039	XPO7	10328364	117.587	9.30476	1.18559	99.1807	4.73864	83.8502	11.6758	162	176	178
23039	XPO7	10320871	110.306	3.76555	1.11913	98.5641	9.92335	94.4639	12.0403	162	176	178
23039	XPO7	10324488	93.3421	2.93303	0.925897	100.813	4.77741	107.34	4.28954	162	176	178
