# Supplementary material for: RNAi Screen for NRF2 Inducers Identifies Targets That Rescue Primary Lung Epithelial Cells from Cigarette Smoke Induced Radical Stress
Source: PLoS One. 2016 Nov 10;11(11):e0166352. doi: 10.1371/journal.pone.0166352 (PMC5104413; doi:10.1371/journal.pone.0166352)
Supplement: S4 Table — Screening hits are marked in grey. (XLSX) [file pone.0166352.s004.xlsx]

## Sheet: Sheet1
gene_acc	gene_name	sirna_ids	Supplier Molecule Design ID	mean normalized Luc induction (% of controls)	SD Luc	mean normalized Luc induction (% of controls) pass 3	SD Luc pass 3	NQO1_mRNA_fold.change (siControl = 100%)	NQO1_mRNA_p.value
80724	ACAD10	10322720	s37313	87.78	7.45	74.0157	0.00160014	113.991	0.807559
80724	ACAD10	10330381	s37314	133.07	13.87	130.443	0.0031878	105.702	0.508758
80724	ACAD10	10342849	s37312	97.31	3.25	91.1721	0.00364042	87.1482	0.136983
103	ADAR	10339635	s1009	102.33	16.43	86.9448	0.0187523	105.609	0.00291445
103	ADAR	10333849	s1008	119.35	12.17	107.395	0.0498981	96.2051	0.616776
103	ADAR	10327012	s1007	165.21	10.58	137.883	0.000383461	81.3713	0.0743523
107	ADCY1	10339631	s1017	113.79	6.31	120.928	0.000594962	110.833	0.208425
107	ADCY1	10327008	s1016	100.12	12.88	96.2837	0.350909	93.1959	0.199924
107	ADCY1	10333845	s1018	138.52	11.31	175.021	0.000186727	81.3189	0.023452
56895	AGPAT4	10330216	s32331	152.37	20.89	153.049	0.00507172	171.873	0.0600094
56895	AGPAT4	10322554	s32332	108.78	11.18	100.775	0.756114	85.639	0.100433
56895	AGPAT4	10320048	s32333	79.64	5.25	83.3144	0.00180013	73.1608	0.0267137
22901	ARSG	10324446	s22626	114.22	1.05	140.953	0.00056794	153.366	0.0419377
22901	ARSG	10328321	s22627	90.27	3.69	90.9281	0.0775679	107.688	0.330671
22901	ARSG	10320829	s223542	94.53	9.28	123.212	0.00177427	104.217	0.840417
50807	ASAP1	10329603	s27101	198.7	11.89	249.968	4.63968e-06	207.449	0.00088895
50807	ASAP1	10323154	s27100	103.24	3.67	117.704	0.00267423	106.101	0.627417
50807	ASAP1	10321680	s27099	90	8.08	89.1767	0.00271494	58.5379	0.00621088
60468	BACH2	10322392	s34070	149.2	11.15	151.396	0.000293969	133.906	0.126833
60468	BACH2	10320577	s34072	137.99	7.42	99.6571	0.835582	107.024	0.1369
60468	BACH2	10330054	s34071	120.38	13.68	125.089	5.95182e-05	55.1842	0.00869214
9530	BAG4	10327762	s18289	118.4	8.08	114.035	0.0202253	88.7158	0.197592
9530	BAG4	10340561	s18287	113.81	8.87	124.541	0.000702069	87.8729	0.242828
9530	BAG4	10335033	s18288	160.43	26.77	131.628	0.0139231	66.8982	0.0686484
8314	BAP1	10318790	s15822	116.25	7.45	173.493	0.00148333	165.827	0.035917
8314	BAP1	10314842	s15821	123.85	4.11	132.585	0.000859084	102.389	0.515315
8314	BAP1	10332110	s15820	103.03	12	97.2782	0.544831	99.8048	0.944686
2186	BPTF	10325486	s5009	120.92	1.71	160.703	0.000375748	122.187	0.0885828
2186	BPTF	10333244	s5010	97	0.69	97.0067	0.37512	109.217	0.564038
2186	BPTF	10337909	s5011	101.06	6.2	85.1749	0.00150528	97.1485	0.586336
858	CAV2	10337154	s2449	108.09	11.16	122.046	0.00304368	134.849	0.120173
858	CAV2	10333788	s2451	92.99	2.43	104.717	0.0285875	87.0103	0.141755
858	CAV2	10326775	s2450	153.52	17.01	116.876	0.010036	74.5179	0.0302061
867	CBL	10333799	s2477	128.92	8.78	106.454	0.207318	144.455	0.0138138
867	CBL	10326787	s2476	115.45	10.72	112.688	0.00554356	84.7653	0.0820435
867	CBL	10337166	s2478	125.43	13.77	131.359	0.00112993	70.5266	0.38819
66005	CHID1	10330557	s35347	130.01	16.75	181.337	0.000866255	110.241	0.348464
66005	CHID1	10320733	s35345	94.69	3.05	119.172	0.0180657	102.266	0.664041
66005	CHID1	10322896	s35346	119.73	12.93	121.812	0.000998384	96.4419	0.490488
1123	CHN1	10333576	s3017	154.36	13.95	149.094	0.000106876	115.897	0.614029
1123	CHN1	10325821	s3016	100.83	2.24	108.005	0.00421395	77.2599	0.0476584
1123	CHN1	10336940	s3018	76.13	6.3	101.119	0.461909	62.2595	0.0792321
113189	CHST14	10343247	s41438	123.76	12.17	125.338	0.000422914	162.455	0.00103771
113189	CHST14	10313330	s41439	147.38	7.7	135.129	0.00133051	106.441	0.523318
113189	CHST14	10330779	s41440	67.98	9.75	84.0236	0.00226055	54.859	0.152218
1261	CNGA3	10341314	s3239	143.93	5.15	184.913	0.000768462	166.665	0.00295418
1261	CNGA3	10317372	s3241	151.61	7.09	165.614	0.00178572	115.891	0.156488
1261	CNGA3	10314360	s3240	86.24	3.86	77.7525	0.00704995	97.1844	0.449948
1299	COL9A3	10336450	s3337	114.11	27.49	102.936	0.288421	113.506	0.40602
1299	COL9A3	10335507	s3336	122.06	2.13	120.887	0.00194816	101.176	0.76518
1299	COL9A3	10340180	s3335	94.21	8.36	92.3658	0.0302352	79.8365	0.135875
26958	COPG2	10328894	s223714	184.72	20.71	193.499	0.00176367	129.286	0.0772132
26958	COPG2	10324236	s25644	133.56	46.22	101.919	0.206031	96.9885	0.81799
26958	COPG2	10321828	s25643	104.78	11.49	97.2386	0.527519	79.4253	0.0885773
1384	CRAT	10325858	s3486	171.67	13.04	138.448	0.00492993	110.136	0.00208712
1384	CRAT	10333613	s3487	111.32	3.04	126.796	3.47218e-05	104.258	0.231163
1384	CRAT	10336977	s3488	86.56	4.82	105.657	0.334544	83.9218	0.37297
1428	CRYM	10336992	s3577	137.02	7.72	116.809	0.00488593	114.507	0.306894
1428	CRYM	10325873	s3578	78.23	3.27	77.1371	0.00253319	95.2254	0.431034
1428	CRYM	10333628	s3576	119.01	9.2	119.501	0.000711304	75.9945	0.254957
8452	CUL3	10345418	s16050	153.15	5.28	145.911	3.72218e-05	120.784	0.00734312
8452	CUL3	10345417	s16049	165.3	2.11	149.48	0.00308508	108.142	0.360048
8452	CUL3	10345419	s16048	68	2.84	77.0376	0.00118559	95.8217	0.451358
1612	DAPK1	10331359	s3930	134.76	6.2	179.585	0.000935174	104.8	0.557241
1612	DAPK1	10326439	s3929	95.04	2.12	96.2243	0.249944	103.999	0.776476
1612	DAPK1	10339474	s3931	107.31	23.69	83.8712	0.0378749	96.4448	0.555133
10671	DCTN6	10321280	s20988	114.08	4.15	110.872	0.00930475	99.5187	0.911911
10671	DCTN6	10328426	s223148	135.14	14.33	93.4306	0.0616289	88.1655	0.405234
10671	DCTN6	10325071	s20989	104.13	9.64	100.63	0.830795	75.6117	0.00106175
23564	DDAH2	10323976	s24109	105.9	6.17	138.093	4.48713e-05	133.3	0.0210773
23564	DDAH2	10328882	s24108	146.38	12.41	148.349	0.00012638	106.714	0.746021
23564	DDAH2	10321042	s24107	107.61	4.08	109.107	0.0720093	104.646	0.241903
414301	DDI1	10332049	s53923	111.76	2.96	98.356	0.559977	105.738	0.382318
414301	DDI1	10314781	s53924	120.51	12.05	110.708	0.00358024	89.5272	0.0177383
414301	DDI1	10318900	s53925	76.49	11.01	127.394	0.00206456	82.6337	0.00182114
780	DDR1	10331310	s2299	103.07	14.69	116.533	0.00213234	116.18	0.104218
780	DDR1	10326390	s2298	108.71	8.59	116.878	0.007448	110.708	0.709429
780	DDR1	10339427	s2300	109.28	2.06	148.493	7.37233e-07	91.946	0.20318
1659	DHX8	10333379	s4017	292.69	114.04	191.393	0.00185462	126.277	0.109392
1659	DHX8	10246188	s4016	82.48	3.55	97.5233	0.280576	94.3974	0.381968
1659	DHX8	10325621	s4018	193.95	57.15	117.391	0.0166624	84.3972	0.00310843
1869	E2F1	10325535	s4406	121.34	7.54	124.536	0.00212758	136.928	0.00358917
1869	E2F1	10333120	s4405	99.4	4.98	123.211	0.00876885	135.374	0.0148622
1869	E2F1	10337611	s223454	117.06	4.56	123.776	0.0111021	87.0582	0.00197921
9343	EFTUD2	10334147	s17863	145.91	4.13	179.263	6.68497e-05	103.883	0.690481
9343	EFTUD2	10327136	s17862	115.82	9.99	131.798	0.00134249	80.4395	0.0804518
9343	EFTUD2	10339757	s17864	113.91	4.68	136.311	0.000742254	68.4277	0.00220649
6785	ELOVL4	10317449	s13559	141.64	18.45	136.723	0.000274409	145.438	0.0622622
6785	ELOVL4	10314267	s224700	128.56	9.85	113.46	0.000202792	80.551	0.119657
6785	ELOVL4	10341053	s13558	114.11	17.61	86.6487	0.00947419	73.1127	0.122714
2101	ESRRA	10340906	s4829	91.74	4.17	311.648	0.000225552	124.184	0.127297
2101	ESRRA	10315319	s4830	88.4	3.4	95.3743	0.118798	82.457	0.0678555
2101	ESRRA	10317649	s4831	129.48	10.17	138.833	0.000255608	78.0976	0.410845
2109	ETFB	10325460	s223502	91.35	4.1	109.358	0.0440979	102.282	0.667587
2109	ETFB	10337884	s194400	159.19	4.03	154.695	2.05571e-05	84.9099	0.032645
2109	ETFB	10333219	s517	104.88	8.48	105.815	0.00669606	82.313	0.0251375
10922	FASTK	10329072	s21479	205.6	27.68	205.082	0.00019013	123.401	0.00820774
10922	FASTK	10323994	s223164	102.98	6.48	136.584	0.000129623	98.4083	0.815712
10922	FASTK	10321406	s21477	92.54	7.29	98.2234	0.0221242	91.5122	0.107153
2204	FCAR	10337927	s200435	144.14	6.6	134.643	0.000804964	102.044	0.644916
2204	FCAR	10333261	s200434	88.39	3.58	99.9237	0.968808	89.6758	0.235892
2204	FCAR	10325504	s200433	60.95	5.83	57.603	0.00234647	56.5604	0.0258915
2280	FKBP1A	10325523	s5207	140.69	35.88	156.15	4.93985e-05	125.142	0.0453839
2280	FKBP1A	10337946	s5205	80.31	2.22	82.3158	1.39134e-05	106.636	0.356194
2280	FKBP1A	10333281	s5206	102.47	4.12	74.2362	0.0020106	87.6898	0.16363
55640	FLVCR2	10319890	s31146	111.36	0.34	116.749	0.00465316	131.943	0.00962492
55640	FLVCR2	10323431	s31148	127.61	19.54	122.4	0.0088237	105.106	0.419258
55640	FLVCR2	10329714	s31147	99.79	9.45	110.983	0.00393314	96.8882	0.555025
2581	GALC	10325414	s5530	109.83	1.92	113.835	0.00114098	103.916	0.19448
2581	GALC	10337837	s5532	141.04	3.25	167.764	0.000643927	103.862	0.64016
2581	GALC	10332999	s5531	115.91	7.93	107.714	0.0412988	90.4113	0.000204265
2643	GCH1	10333029	s5643	124.17	10.68	110.06	0.0170522	105.755	0.651436
2643	GCH1	10337868	s5644	96.94	7.41	106.708	0.0233751	86.0225	0.266132
2643	GCH1	10325444	s5645	127.4	3.16	147.105	0.000313493	83.9519	0.103914
2669	GEM	10333038	s5697	140.9	12.76	201.256	7.41688e-05	133.116	0.0213118
2669	GEM	10337356	s5698	93.51	2.51	79.8634	0.00254251	106.361	0.144138
2669	GEM	10325278	s5696	83.83	5.92	115.263	0.000110242	101.814	0.48102
2677	GGCX	10333045	s5721	141.19	7.57	154.506	0.000162545	361.195	0.349258
2677	GGCX	10325285	s5720	109.4	11.43	101.16	0.771203	106.976	0.215759
2677	GGCX	10337363	s5722	92.27	7.92	97.3892	0.291993	86.3452	0.00923982
57165	GJC2	10339940	s32814	109.88	8.31	101.807	0.449414	148.462	0.378175
57165	GJC2	10327581	s195317	105.8	0.87	147.227	0.000460272	91.7493	0.0315959
57165	GJC2	10336235	s195316	157.79	7.72	127.13	0.000442925	89.3648	0.183277
29925	GMPPB	10324212	s26716	84.29	6.78	66.9982	0.00110593	134.655	0.0243423
29925	GMPPB	10329040	s26717	103.64	13.06	112.225	0.00318163	104.336	0.486164
29925	GMPPB	10321976	s26715	127.2	4.57	147.685	0.000525237	103.337	0.264316
23432	GPR161	10316151	s23821	127	12.63	103.044	0.360614	98.695	0.597319
23432	GPR161	10342627	s23820	108.35	1.91	122.786	0.00019713	84.3214	0.0362884
23432	GPR161	10318220	s23822	126.4	13.05	108.991	0.0742976	79.175	0.0348059
11245	GPR176	10316143	s223216	154.44	20.97	202.267	3.00377e-06	189.979	0.00159454
11245	GPR176	10342619	s22196	115.51	0.78	97.0661	0.644286	144.383	0.0451556
11245	GPR176	10318212	s22198	120.72	9.62	98.3075	0.541246	44.9836	0.0143129
9953	HS3ST3B1	10316449	s225195	107.36	9.21	93.599	0.0375987	151.679	0.00491886
9953	HS3ST3B1	10338754	s19328	183.07	10.82	176.782	0.00124539	137.557	0.00565966
9953	HS3ST3B1	10324599	s19327	101.16	11.4	84.0817	0.00120433	90.7225	0.069097
374875	HSD11B1L	10319537	s196148	126.58	13	141.556	0.00234135	138.785	0.0773178
374875	HSD11B1L	10313154	s51599	82.56	1.12	83.0612	0.000912894	103.232	0.643015
374875	HSD11B1L	10341945	s223961	108.48	4.38	116.421	0.00952575	83.7483	0.204137
55699	IARS2	10329731	s31283	124.73	13.03	121.781	0.000409847	99.0355	0.91321
55699	IARS2	10319907	s31281	132.97	10.39	139.463	7.81725e-06	93.3828	0.179857
55699	IARS2	10323448	s31282	99.7	10.47	74.133	0.00142795	81.0042	0.00518111
3597	IL13RA1	10332643	s7372	118.53	17.01	150.645	4.37652e-05	126.924	0.0647145
3597	IL13RA1	10337480	s7373	115.8	1.03	107.414	0.0367916	92.6402	0.259695
3597	IL13RA1	10326010	s7371	94.56	10.23	71.4416	0.000686724	61.9857	0.0857918
23765	IL17RA	10328579	s24373	143.51	15.41	148.179	0.000565998	122.421	0.0198853
23765	IL17RA	10323847	s24375	93.54	3.68	94.942	0.0674338	90.7212	0.0776312
23765	IL17RA	10321087	s24374	114.33	5	121.037	0.00266233	80.475	0.026271
56623	INPP5E	10319209	s32192	140.07	10.46	151.103	0.00147946	107.411	0.322826
56623	INPP5E	10342269	s32190	123.04	12.23	131.538	0.000499814	87.3159	0.0285728
56623	INPP5E	10315778	s32191	85.7	10.94	72.9276	0.00271881	62.2089	0.00406258
3688	ITGB1	10332700	s7576	90.08	2.57	79.9031	0.00100095	100.8	0.921417
3688	ITGB1	10338401	s7574	123.91	12.58	130	0.00182338	83.8833	0.153043
3688	ITGB1	10325893	s7575	107.69	7.63	101.113	0.333347	79.1794	0.0021991
3752	KCND3	10314406	s7719	133.66	1.09	183.434	1.61833e-05	163.62	0.000555555
3752	KCND3	10317246	s7720	124.37	36.18	104.698	0.135045	121.243	0.0536137
3752	KCND3	10341192	s7718	109.06	4.64	117.666	0.00875001	99.1586	0.89106
81033	KCNH6	10314570	s37491	103.69	9.21	108.76	0.0159452	116.21	0.0895022
81033	KCNH6	10317059	s37492	108.25	4.69	84.4303	0.0075783	100.963	0.885957
81033	KCNH6	10341350	s37490	146.48	29.17	125.936	0.00200975	79.7416	0.0927986
10089	KCNK7	10317095	s195015	112.71	12.52	120.803	0.00193557	132.519	0.501216
10089	KCNK7	10314605	s195014	130.9	9.47	129.509	0.000224551	90.0385	0.556166
10089	KCNK7	10341384	s195013	92.35	1.16	88.2755	0.0083499	83.8406	0.099945
23510	KCTD2	10341471	s23961	156.41	8.57	128.1	0.00159363	121.078	0.0150818
23510	KCTD2	10317183	s23963	106.45	7.93	91.9703	0.00719259	66.5854	0.00572621
23510	KCTD2	10314518	s23962	93.48	4.83	102.451	0.243316	62.4302	0.00110725
9817	KEAP1	10327784	s18983	271.41	36.09	343.959	0.000190021	319.95	0.04295
9817	KEAP1	19864	19864	104.77	2.54	499.338	0.000223966	274.968	0.00285688
9817	KEAP1	10340583	s18981	288.87	29.45	364.388	0.00036538	229.387	0.0441512
23046	KIF21B	10320873	s22909	131.95	25.59	97.1307	0.255336	98.4773	0.891674
23046	KIF21B	10328366	s22910	97.46	3.88	95.9036	0.382057	81.9435	0.0136257
23046	KIF21B	10324490	s22908	107.69	3.26	94.0837	0.135567	67.8156	0.321262
83746	L3MBTL2	10327369	s38178	134.48	1	149.304	0.000466925	112.259	0.00370896
83746	L3MBTL2	10340432	s38176	112.81	4.46	181.554	7.09744e-06	99.5051	0.670135
83746	L3MBTL2	10336023	s38177	111.94	6.99	136.743	0.000412111	88.492	0.0132246
10859	LILRB1	10328457	s21317	107.79	16.58	90.9567	0.000398965	102.742	0.580893
10859	LILRB1	10324927	s21318	121.98	3.68	109.957	0.0170683	96.2579	0.593955
10859	LILRB1	10321138	s21316	84.42	4.72	92.0829	0.0188079	78.2531	0.0292853
4074	M6PR	10338374	s8374	151.49	9.12	241.442	0.000123706	156.114	0.00119114
4074	M6PR	10316592	s8373	98.58	5.18	126.758	0.000776392	92.3655	0.637958
4074	M6PR	10332497	s8375	111.74	3.75	118.358	0.00848236	39.4583	0.00219063
225689	MAPK15	10321614	s48270	83.3	9.12	98.4773	0.782267	116.273	0.346463
225689	MAPK15	10323257	s48271	101.37	8.37	115.737	0.00630417	95.218	0.323754
225689	MAPK15	10329536	s48272	148.79	7.76	107.034	0.130436	69.7556	0.0870619
23162	MAPK8IP3	10324352	s23166	144.28	4.35	117.958	0.0022015	129.845	0.590782
23162	MAPK8IP3	10320909	s23167	112.68	7.35	122.262	0.00148059	109.943	0.30832
23162	MAPK8IP3	10328749	s23168	101.39	3.35	109.549	0.0382045	94.8892	0.203567
4249	MGAT5	10316653	s8738	213.49	16.72	225.195	1.02002e-05	146.934	0.00904603
4249	MGAT5	10338610	s8739	111.03	7.14	117.02	0.00401849	100.647	0.881753
4249	MGAT5	10332558	s8740	102.64	11.85	124.519	0.00136863	82.2658	0.112711
2872	MKNK2	10331401	s6094	136.9	3.91	155.415	0.000449845	137.409	0.0607796
2872	MKNK2	10338999	s6095	109.25	3.52	121.373	0.00194028	90.2626	0.169372
2872	MKNK2	10326313	s6093	102.47	2.86	113.006	0.0103098	88.6641	0.433123
4350	MPG	10338643	s8930	104.06	5.86	118.135	0.000450389	112.177	0.063366
4350	MPG	10316686	s8928	116.73	8.97	98.179	0.181633	87.2602	0.242348
4350	MPG	10332591	s8929	139.92	7.22	170.626	0.00017544	84.7947	0.14127
63908	NAPB	10336283	s224588	144.26	9.34	153.342	6.47505e-05	116.791	0.0141687
63908	NAPB	10327453	s34251	104.72	20.61	100.851	0.867268	106.051	0.184878
63908	NAPB	10339812	s34249	112.49	11.42	95.4599	0.132299	91.9611	0.676205
4688	NCF2	10316778	s9305	94.32	4.98	91.3338	0.00924345	106.665	0.0850862
4688	NCF2	10332333	s9303	110.03	10.31	136.322	0.000407336	87.9662	0.174708
4688	NCF2	10338559	s9304	130.87	28.17	124.525	0.000791788	84.8305	0.133994
8648	NCOA1	10246191	s16460	132.78	10.69	128.647	0.00688958	105.948	0.0451641
8648	NCOA1	10327248	s16461	100.5	11.7	107.24	0.0505375	90.8344	0.0158995
8648	NCOA1	10334257	s16459	187.97	21.82	148.499	0.000209827	87.9424	0.0246739
4696	NDUFA3	10332332	s224094	100.42	3.28	103.229	0.304709	101.862	0.941316
4696	NDUFA3	10316777	s9327	85.82	1	116.223	0.00697377	88.1949	0.0170871
4696	NDUFA3	10338558	s194639	107.72	6.95	153.087	3.03486e-05	75.5617	0.164669
51199	NIN	10329336	s27662	130	2.16	132.119	0.00164163	137.865	0.0324765
51199	NIN	10323059	s27661	137.67	13.38	123.433	0.000227375	95.6974	0.562866
51199	NIN	10320205	s27663	97.42	8	120.577	0.00275768	86.8443	0.220351
83714	NRIP2	10331931	s38136	90.34	10.04	86.1902	0.0092002	128.061	0.0195981
83714	NRIP2	10318610	s38138	123.57	5.63	115.548	0.000211385	91.2541	0.282786
83714	NRIP2	10314059	s38137	147.34	4.33	136.565	0.000874514	89.1598	0.0605153
4946	OAZ1	10332188	s224144	164.09	19.88	170.888	9.59448e-05	128.134	0.0321778
4946	OAZ1	10337984	s83	137.91	3.49	137.293	0.000243437	113.525	0.0376937
4946	OAZ1	10316198	s84	96.27	9.77	142.21	0.00270398	85.1107	0.110137
51686	OAZ3	10323665	s28523	117.17	11.44	122.082	0.000322169	133.546	0.344673
51686	OAZ3	10329432	s28524	124.25	6.92	105.635	0.0226293	123.965	0.0211343
51686	OAZ3	10320301	s28525	94.82	5.14	93.4041	0.251778	89.75	0.21015
55644	OSGEP	10318738	s31154	128.58	7.73	149.547	0.000227463	162.054	0.0162813
55644	OSGEP	10331886	s31152	94.84	5.89	109.333	0.00346545	137.22	0.0251245
55644	OSGEP	10314014	s31153	106.76	4.02	126.091	0.000128189	107.631	0.331663
5033	P4HA1	10316228	s9975	149.09	11.87	212.324	0.00043214	176.723	0.00162855
5033	P4HA1	10332218	s224154	118.16	18.17	102.633	0.164396	107.147	0.859735
5033	P4HA1	10338014	s9977	97.43	1.94	110.099	0.0153527	85.2353	0.0756177
55486	PARL	10318728	s30890	111.91	10.23	108.706	0.033729	111.211	0.655604
55486	PARL	10314004	s30889	117.91	10.22	83.4023	0.00295072	108.218	0.101269
55486	PARL	10331876	s30888	50.94	5.75	57.5141	8.29597e-06	105.447	0.0869454
54510	PCDH18	10320393	s29106	139.25	10.62	122.936	0.00508885	92.0057	0.220908
54510	PCDH18	10323585	s29107	121.28	9.69	117.682	0.0252791	88.7539	0.093371
54510	PCDH18	10329871	s29108	167.97	1.25	184.303	1.24924e-05	68.2562	0.1959
5190	PEX6	10315867	s10309	147.26	12.91	191.467	0.000101902	130.373	0.591951
5190	PEX6	10342185	s10311	143.09	10.78	181.665	0.000166886	114.833	0.0291885
5190	PEX6	10319124	s10310	84.65	6.25	79.3962	0.00094794	85.5486	0.105512
5251	PHEX	10319143	s10431	174.21	2.89	179.446	0.000105053	129.768	0.0420133
5251	PHEX	10342203	s10432	118.89	5.97	106.24	0.0844593	99.9833	0.998691
5251	PHEX	10315885	s10430	101.49	4.59	103.271	0.439338	86.1557	0.516811
5300	PIN1	10315909	s10545	112.2	6.71	86.8376	0.00926671	112.183	0.0131621
5300	PIN1	10342226	s10544	112.86	26.59	99.6795	0.673799	92.5899	0.645015
5300	PIN1	10319166	s10546	98.36	2.05	91.5243	0.00322732	73.1703	0.0516634
9651	PLCH2	10246408	s18563	143.15	12.13	147.94	0.000354282	105.196	0.358876
9651	PLCH2	10324688	s18564	210.61	12.62	210.64	1.62607e-05	104.839	0.842245
9651	PLCH2	10246409	s18565	71.97	5.82	86.3349	0.0190444	81.9939	0.264344
23228	PLCL2	10320932	s23335	133.99	18.89	100.687	0.677697	127.501	0.147942
23228	PLCL2	10324376	s23336	114.5	8.05	102.91	0.231166	127.453	0.07357
23228	PLCL2	10328773	s23334	105.73	3.62	113.505	0.00546146	99.2074	0.965636
23646	PLD3	10323821	s24272	94.9	5.9	106.386	0.043738	115.133	0.158977
23646	PLD3	10321061	s24273	117.62	9.9	104.288	0.0453669	96.2786	0.529052
23646	PLD3	10328553	s24271	146.75	10.29	183.691	0.000178024	90.2209	0.140536
5347	PLK1	10242429	s450	100.85	8.23	116.725	0.00117863	105.476	0.0990505
5347	PLK1	10242438	s448	83.31	5.58	101.09	0.838236	90.6548	0.317933
5347	PLK1	10242428	s449	72.59	10.23	128.167	0.0350175	85.1248	0.191305
10622	POLR3G	10325049	s20864	126.13	3.78	226.058	0.000158075	174.047	0.008903
10622	POLR3G	10321259	s20865	117.4	4.19	114.726	0.0409385	131.585	0.00335796
10622	POLR3G	10328405	s20863	103.48	8.32	106.925	0.0270758	89.852	0.39848
8500	PPFIA1	10326192	s507	110.13	3.93	117.899	0.00564294	107.244	0.408696
8500	PPFIA1	10334211	s506	103.19	7.06	111.784	0.000902019	95.8321	0.293275
8500	PPFIA1	10336794	s505	134.56	12.59	168.906	0.000617042	90.6195	0.204001
5511	PPP1R8	10342146	s10954	134.66	6.06	149.052	0.000397617	132.387	0.00938972
5511	PPP1R8	10319429	s10956	173.46	31.45	153.232	0.00490878	91.1237	0.104994
5511	PPP1R8	10315656	s10955	131.45	19.85	117.8	0.000176609	80.8919	0.289112
26121	PRPF31	10323764	s25123	109.46	8.15	130.054	0.0206925	195.509	0.00116191
26121	PRPF31	10321778	s25122	191.72	15.59	336.224	2.52849e-06	112.522	0.0712428
26121	PRPF31	10328671	s223678	131.6	14.63	111.058	0.0293041	100.872	0.74681
5700	PSMC1	10342708	s11368	129.03	15.89	180.545	0.00372223	132.133	0.394838
5700	PSMC1	10317967	s11370	115.89	13.45	121.816	0.00266005	102.446	0.807483
5700	PSMC1	10315121	s11369	118.47	8.64	119.236	0.0889672	85.0384	0.0542833
5701	PSMC2	10317968	s11371	116.98	15.17	122.643	0.00314437	141.544	0.030386
5701	PSMC2	10342709	s11372	174.14	11.33	194.712	0.00101339	135.031	0.141622
5701	PSMC2	10315122	s11373	115.13	8.62	139.856	0.00927142	120.588	0.00788807
5704	PSMC4	10342711	s11379	120.39	6.72	161.649	0.00446323	195.766	0.000183092
5704	PSMC4	10317970	s11377	112.62	11.92	139.686	0.00081203	164.619	0.00163262
5704	PSMC4	10315124	s11378	111.1	5.83	134.329	0.00071051	133.026	0.403675
5708	PSMD2	10315129	s11390	118.9	5.31	131.778	0.0327329	129.684	0.0355133
5708	PSMD2	10317975	s11389	137.4	0.7	140.486	0.00406479	92.2826	0.398149
5708	PSMD2	10342716	s11391	85.36	4.26	98.1793	0.744674	82.5184	0.00905015
9861	PSMD6	10316423	s19092	114.21	6.08	171.238	0.00270325	168.614	0.0128851
9861	PSMD6	10338207	s19094	122.32	2.93	129.619	0.00719896	158.703	0.246212
9861	PSMD6	10324749	s19093	148.79	5.56	167.535	0.00273935	151.078	0.0532295
9364	RAB28	10334150	s17911	140.51	9.71	173.737	3.9653e-05	173.568	0.00919446
9364	RAB28	10327139	s17910	99.52	6.3	104.47	0.0428794	90.088	0.122909
9364	RAB28	10339760	s17912	112.72	17.93	133.13	0.000486113	85.9077	0.00545684
11020	RABL4	10321215	s21705	141.7	29.44	111.687	0.0777196	106.302	0.0306856
11020	RABL4	10325004	s21704	113.21	6.22	89.7395	0.00826307	104.957	0.563738
11020	RABL4	10328534	s21706	93.04	1.19	89.4591	0.119438	69.8244	0.0342782
83937	RASSF4	10343134	s38340	106.1	3.3	119.218	0.00215006	120.12	0.254746
83937	RASSF4	10322311	s38339	134.3	4.65	120.689	0.00141319	105.893	0.299487
83937	RASSF4	10330492	s224921	113.32	3.18	101.879	0.517093	95.3118	0.265958
5947	RBP1	10340809	s11872	110.32	4.72	116.549	0.0145119	101.105	0.862262
5947	RBP1	10317896	s11871	157.14	20.8	167.004	3.68453e-05	95.1316	0.613208
5947	RBP1	10315223	s224524	67.36	3.64	71.3157	0.00376996	79.0429	0.0506738
25898	RCHY1	10321124	s24704	141.06	21.78	141.372	0.000279314	101.03	0.843399
25898	RCHY1	10328616	s24705	110.64	3.54	108.479	0.0110442	100.86	0.885857
25898	RCHY1	10323885	s24703	95.47	7.13	109.022	0.0300549	92.3511	0.198201
5998	RGS3	10315250	s200452	112.39	9.63	119.476	0.000281487	102.947	0.559442
5998	RGS3	10317751	s200453	118.84	6.33	155.201	0.00046075	86.7197	0.147446
5998	RGS3	10340663	s200451	146.18	22.07	149.638	0.000867608	82.7535	0.0370223
9628	RGS6	10316358	s18505	107.71	9.66	127.098	0.00183253	145.903	0.0298862
9628	RGS6	10324683	s18504	126.39	9.65	100.328	0.60992	119.84	0.0186951
9628	RGS6	10338144	s18503	125.72	12.87	122.989	0.000619894	116.291	0.122573
9743	RICS	10338177	s18797	117.38	11.29	124.492	0.00158636	107.221	0.134701
9743	RICS	10316392	s18799	111.77	2.42	124.026	0.00118969	100.983	0.292013
9743	RICS	10324718	s18798	126.35	8.66	130.959	0.00339766	94.167	0.245125
390	RND3	10333647	s1578	157.92	12.73	120.799	9.27215e-05	131.27	0.0204224
390	RND3	10326807	s223997	109.18	7.67	115.523	0.000884811	109.796	0.0226988
390	RND3	10337186	s1579	95.1	10.59	75.6533	0.00518175	84.1227	0.17715
6047	RNF4	10335717	s12075	130.23	26.2	165.396	0.000123804	124.138	0.00818853
6047	RNF4	10334422	s12074	97.58	2.49	103.773	0.0292925	105.202	0.377734
6047	RNF4	10340038	s12073	110.2	4.99	113.662	0.00219619	85.9755	0.283864
9616	RNF7	10316347	s18474	133.72	26.86	147.367	0.000195689	135.449	0.0829427
9616	RNF7	10338133	s18473	116.58	12.05	114.464	0.0205285	109.073	0.199683
9616	RNF7	10324671	s18475	101.91	2.21	107.392	0.0520664	87.1964	0.204257
4920	ROR2	10339043	s9760	143.67	19.26	139.309	0.000426537	109.804	0.392664
4920	ROR2	10326355	s9758	122.3	14.44	111.81	0.00775517	103.371	0.514247
4920	ROR2	10331443	s9759	105.7	4.72	100.401	0.793182	77.6574	0.00459259
349667	RTN4RL2	10313139	s196126	77.25	6.38	97.1729	0.286415	113.857	0.0456037
349667	RTN4RL2	10319522	s51400	115.54	13.05	110.399	0.0379285	91.6115	0.0679343
349667	RTN4RL2	10341930	s51401	138.13	9.25	147.258	0.00152581	85.8249	0.197824
10856	RUVBL2	10328462	s21309	165.46	19.95	177.982	3.16382e-05	121.369	0.0649048
10856	RUVBL2	10324931	s21308	138.61	11.05	185.185	0.000432116	120.862	0.368055
10856	RUVBL2	10321143	s21307	67.11	0.89	148.208	0.00369065	97.9271	0.824353
51128	SAR1B	10323200	s27507	81.03	3.49	109.482	0.0623083	102.221	0.747777
51128	SAR1B	10321726	s27506	97.35	8.4	108.751	0.0102586	96.3711	0.156905
51128	SAR1B	10329650	s224190	127.98	9.6	103.971	0.0668156	91.9107	0.424079
54549	SDK2	10323591	s29184	146.85	12.95	173.959	0.000581912	113.461	0.0370153
54549	SDK2	10320400	s29183	116.2	5.11	104.215	0.154002	94.8498	0.0181917
54549	SDK2	10329877	s29185	104.63	7.7	116.66	0.00170184	79.7934	0.0953301
9739	SETD1A	10338167	s18790	124.27	1.26	158.713	0.000102665	105.363	0.634554
9739	SETD1A	10316382	s18788	123.89	16.04	114.943	0.000222106	101.391	0.769208
9739	SETD1A	10324708	s18789	107.19	0.65	100.897	0.75032	87.5561	0.104392
27036	SIGLEC7	10328906	s25730	101.81	8.38	104.323	0.223181	98.0975	0.627233
27036	SIGLEC7	10321840	s25731	85.46	6.9	91.848	0.235714	96.7889	0.476705
27036	SIGLEC7	10324248	s25729	137.17	24.54	163.427	0.00119098	88.5146	0.0971942
387700	SLC16A12	10319563	s51910	82.66	4.25	112.819	0.00179715	106.52	0.445405
387700	SLC16A12	10341971	s51911	173.32	13.21	146.351	0.00108361	94.9752	0.334102
387700	SLC16A12	10313180	s51912	104.21	6.51	98.9685	0.219611	85.49	0.154662
10998	SLC27A5	10324991	s21651	110.73	7.18	106.577	0.00290444	123.57	0.0737527
10998	SLC27A5	10328521	s21652	131.88	10.53	138.048	0.000943956	114.547	0.0593251
10998	SLC27A5	10321202	s21653	129.86	8.36	140.797	0.000632214	92.0958	0.461199
347734	SLC35B2	10313138	s51296	183.68	17.35	151.634	0.000321424	117.167	0.0683916
347734	SLC35B2	10319521	s51295	81.8	5.29	102.897	0.497057	96.3357	0.223529
347734	SLC35B2	10341929	s51297	77.89	4.35	78.2789	0.0032043	68.7555	0.000406422
23049	SMG1	10324021	s22918	306.54	70.07	387.014	7.89298e-05	152.983	0.0152047
23049	SMG1	10321433	s22917	127.96	2.99	151.231	0.00373891	104.666	0.620558
23049	SMG1	10329100	s223562	193.8	19.39	249.38	7.39985e-05	83.4221	0.0575541
6632	SNRPD1	10315555	s224661	144.32	19.31	162.947	2.0095e-05	165.004	0.00269311
6632	SNRPD1	10317536	s13229	120.2	5.05	127.348	0.014492	93.0414	0.258175
6632	SNRPD1	10341137	s13230	144.67	12.6	219.165	0.000942696	57.2439	0.0464985
6633	SNRPD2	10341138	s13231	125.36	8.51	200.791	0.000911456	114.347	0.074469
6633	SNRPD2	10317537	s224662	141.02	4.54	235.855	1.16077e-06	108.158	0.144661
6633	SNRPD2	10315556	s13232	103.46	0.33	146.447	0.000683679	84.3091	0.0582525
6647	SOD1	10315559	s453	145.44	9.56	146.264	0.000591528	129.615	0.0241306
6647	SOD1	10341141	s451	99.65	15.97	93.3183	0.0956947	99.8086	0.992386
6647	SOD1	10317540	s452	112.63	7.07	127.184	1.79426e-07	97.7088	0.520251
84926	SPRYD3	10343266	s39678	157.39	3.1	143.932	0.00100975	118.772	0.0361702
84926	SPRYD3	10330972	s39676	99.45	13.6	121.205	0.00502664	108.863	0.340249
84926	SPRYD3	10322094	s39677	122.28	16.81	98.3638	0.578666	96.9949	0.407202
9517	SPTLC2	10324815	s225153	90.89	8.53	110.172	0.0259187	98.3814	0.545267
9517	SPTLC2	10246523	s18255	107.02	4.64	114.985	0.0138079	89.5558	0.250997
9517	SPTLC2	10246522	s18256	141.57	3.21	106.279	0.509004	78.4669	0.0497283
6781	STC1	10341051	s13549	144.01	7.55	204.483	2.91327e-05	121.146	0.055955
6781	STC1	10314265	s13550	110.54	10.63	112.417	0.00610439	74.6468	0.194144
6781	STC1	10317447	s13551	110.24	10.77	127.331	0.0010878	74.2391	0.00518837
6839	SUV39H1	10341068	s13660	174.3	14.62	189.741	0.000165498	108.773	0.255002
6839	SUV39H1	10314282	s13658	120.99	4.59	134.24	0.000136506	97.4534	0.528969
6839	SUV39H1	10317464	s13659	92.06	8.93	108.657	0.024405	82.2996	0.00070897
6895	TARBP2	10318066	s13792	107.21	15.83	137.33	0.00211659	164.691	0.00904356
6895	TARBP2	10342809	s13790	141.87	29.46	135.488	0.0001832	92.133	0.263008
6895	TARBP2	10315049	s13791	91.82	5.11	75.0164	0.00107312	78.9482	0.0123245
114609	TIRAP	10343428	s195607	132.44	11.12	135.008	0.00439517	109.685	0.320174
114609	TIRAP	10330789	s195608	113.92	7.97	152.481	0.00278263	105.762	0.0397194
114609	TIRAP	10313340	s41563	108.96	11.3	106.184	0.143756	101.13	0.65185
10430	TMEM147	10338856	s20404	105.86	10.39	94.0001	0.0158983	113.771	0.0874535
10430	TMEM147	10316987	s20402	133.96	7.41	131.877	0.00425131	109.308	0.0974527
10430	TMEM147	10325134	s20403	110.75	3.19	119.526	0.00770423	84.2105	0.0911666
8793	TNFRSF10D	10327307	s16751	98.81	6.99	103.591	0.322034	155.019	0.071091
8793	TNFRSF10D	10334316	s16750	154.48	67.63	113.094	0.00505224	99.6052	0.951342
8793	TNFRSF10D	10339242	s16752	102.51	10.23	107.181	0.0310912	87.8662	0.124802
3604	TNFRSF9	10337493	s7388	136.06	15	146.868	0.000133334	118.915	0.14401
3604	TNFRSF9	10332656	s7387	108.04	10.7	114.909	0.00601675	92.1709	0.265607
3604	TNFRSF9	10326021	s7386	109.29	6.27	96.3341	0.311076	89.1175	0.0907997
1861	TOR1A	10333119	s4403	163.4	24.06	172.303	0.000186474	118.455	0.110474
1861	TOR1A	10337610	s4402	105.76	15.14	92.6641	0.0704637	104.764	0.460159
1861	TOR1A	10325534	s4404	109.43	7.06	111.624	0.161154	96.3528	0.24676
7172	TPMT	10331749	s14349	139.17	12.28	190.139	0.00168686	175.173	0.0263304
7172	TPMT	10318427	s14348	175.01	30.21	169.381	1.01761e-05	110.44	0.392749
7172	TPMT	10339360	s14347	103.87	8.81	109.359	0.0109906	91.8105	0.0680666
7249	TSC2	10331755	s14436	111.33	7.12	108.186	0.00348876	132.604	0.025526
7249	TSC2	10318433	s14438	105.51	16.85	133.281	0.000478649	122.704	0.0260515
7249	TSC2	10339366	s14437	227.87	77.2	120.274	0.000458911	120.992	0.0547436
79042	TSEN34	10330575	s35476	97.67	17.26	98.5979	0.594341	111.46	0.411239
79042	TSEN34	10320751	s35474	100.16	7.4	96.808	0.291831	88.9786	0.671675
79042	TSEN34	10322914	s35475	122.65	5.2	110.765	5.92805e-05	78.1879	0.109755
7991	TUSC3	10318540	s15526	82.53	3.83	105.349	0.00635748	99.9975	0.999785
7991	TUSC3	10314164	s15528	113.72	19.76	109.871	0.0105714	92.9482	0.00137589
7991	TUSC3	10331688	s15527	135.21	7.05	128.938	0.00917503	91.071	0.567782
10587	TXNRD2	10328388	s223135	128.76	6.23	116.207	0.00496223	118.537	0.101004
10587	TXNRD2	10325032	s20782	131.13	13.17	199.821	1.15997e-06	116.959	0.0792412
10587	TXNRD2	10321242	s20781	122.29	7.55	79.4776	0.000244392	73.5274	0.104989
7323	UBE2D3	10331794	s14579	207.48	41.01	258.064	1.07047e-05	201.985	0.000110926
7323	UBE2D3	10318472	s14577	99.6	12.31	105.943	0.181883	115.361	0.0683683
7323	UBE2D3	10339404	s14578	116.89	3.01	118.019	0.00516153	70.2243	0.0358502
7388	UQCRH	10331479	s14708	140.15	3.17	179.187	0.000735327	129.508	0.0477464
7388	UQCRH	10318323	s14710	99.48	6.29	117.27	4.50837e-05	108.022	0.404343
7388	UQCRH	10339255	s14709	87.58	3.43	93.5066	0.0410066	73.1552	0.139021
85015	USP45	10314068	s39838	125.94	8.87	102.508	0.25477	93.767	0.00410443
85015	USP45	10331940	s39837	106.23	8.12	117.596	0.000248479	93.6877	0.439607
85015	USP45	10318619	s39839	113.87	4.9	116.137	0.00268227	76.7931	0.000897908
7874	USP7	10314835	s15440	120.08	8.46	118.796	0.000230073	108.546	0.489196
7874	USP7	10332103	s15439	119.82	15.07	120.425	0.00119276	89.7971	0.379489
7874	USP7	10318783	s15441	107.34	11.89	104.736	0.130457	88.9025	0.0054011
7415	VCP	10318339	s14765	148.1	9.29	148.484	0.000868562	127.245	0.0517426
7415	VCP	10331495	s14767	113.12	1.54	143.314	0.000332503	117.667	0.0481918
7415	VCP	10339271	s14766	111.38	6.46	111.574	0.0126793	95.6504	0.34433
56949	XAB2	10320062	s32465	235.12	73.55	488.86	0.000118663	194.966	0.0145493
56949	XAB2	10322567	s32467	106.56	4.49	121.486	0.00231816	109.304	0.0851569
56949	XAB2	10330230	s32466	116.24	4	135.962	0.0153977	88.2455	0.0512005
