# Supplementary material for: RNAi Screen for NRF2 Inducers Identifies Targets That Rescue Primary Lung Epithelial Cells from Cigarette Smoke Induced Radical Stress
Source: PLoS One. 2016 Nov 10;11(11):e0166352. doi: 10.1371/journal.pone.0166352 (PMC5104413; doi:10.1371/journal.pone.0166352)
Supplement: S5 Table — Screening hits are marked in grey. (XLSX) [file pone.0166352.s005.xlsx]

## Sheet: Sheet1
Gene	siRNA	mean survival [%control]	SD	T-test [p-value]
ADCY1	s1018	1.79446	0.913257	0.16878
ADCY1	s1016	1.53534	0.331134	0.0760759
ADCY1	s1017	1.32427	0.36146	0.17738
AGPAT4	s32333	1.34074	0.222341	0.199244
AGPAT4	s32332	1.24877	0.293491	0.444817
AGPAT4	s32331	1.05913	0.241254	0.777667
ARSG	s223542	0.982529	0.348171	0.563007
ARSG	s22627	0.786872	0.359074	0.171396
ARSG	s22626	0.516538	0.335931	0.0222952
ASAP1	s27099	0.568231	0.143641	0.000247285
ASAP1	s27100	0.540504	0.128846	0.000139698
ASAP1	s27101	0.407036	0.194675	5.82236e-05
BAP1	s15821	1.20113	0.113132	0.453247
BAP1	s15822	0.788652	0.332814	0.151319
BAP1	s15820	0.766928	0.254595	0.0748123
BPTF	s5009	0.881099	0.328826	0.28569
BPTF	s5011	0.720925	0.277674	0.060345
BPTF	s5010	0.612554	0.266203	0.0214015
CUL3	s16049	2.32208	1.04357	0.0454756
CUL3	s16050	2.11729	0.61436	0.0168487
CUL3	s16048	0.505907	0.245078	0.00506062
DDAH2	s24109	1.14678	0.180212	0.263377
DDAH2	s24108	1.1081	0.185695	0.445185
DDAH2	s24107	1.09071	0.247643	0.644393
E2F1	s223454	2.20851	0.551027	0.0130809
E2F1	s4405	0.660399	0.312234	0.0500161
E2F1	s4406	0.633846	0.215401	0.0147495
EFTUD2	s17863	0.939131	0.241991	0.505043
EFTUD2	s17864	0.924837	0.355682	0.593069
EFTUD2	s17862	0.484504	0.281643	0.0173649
ESRRA	s4829	2.45389	0.937256	0.0382542
ESRRA	s4831	1.61194	0.483781	0.0731537
ESRRA	s4830	0.690378	0.243632	0.0490683
ETFB	s517	1.24342	0.612778	0.564272
ETFB	s223502	1.02213	0.262839	0.741647
ETFB	s194400	0.842984	0.0600607	0.0235909
FASTK	s21479	1.30065	0.371483	0.217262
FASTK	s223164	1.10371	0.32979	0.673283
FASTK	s21477	0.926017	0.254418	0.469131
FLVCR2	s31147	1.49381	0.484724	0.127239
FLVCR2	s31146	1.40517	0.3656	0.108208
FLVCR2	s31148	1.03021	0.258304	0.989743
GCH1	s5644	0.662192	0.234977	0.00631449
GCH1	s5643	0.556215	0.191103	0.000486831
GCH1	s5645	0.502692	0.157644	0.0001051
GPR176	s22198	0.797966	0.195339	0.0641048
GPR176	s223216	0.596539	0.330605	0.104294
GPR176	s22196	0.450268	0.171786	0.00199296
HS3ST3B1	s19327	0.869945	0.313221	0.351185
HS3ST3B1	s19328	0.737268	0.379815	0.185483
HS3ST3B1	s225195	0.526848	0.256608	0.0119116
IL17RA	s24374	1.12433	0.356626	0.620734
IL17RA	s24373	1.11641	0.507705	0.746913
IL17RA	s24375	0.823859	0.289435	0.231594
INPP5E	s32190	1.54612	0.440077	0.0780411
INPP5E	s32192	1.17747	0.353236	0.447885
INPP5E	s32191	1.13405	0.34094	0.570809
KCND3	s7720	0.916975	0.415337	0.44711
KCND3	s7719	0.845718	0.29839	0.193605
KCND3	s7718	0.782784	0.299183	0.118312
KCNH6	s37491	1.5589	0.421585	0.117012
KCNH6	s37490	1.34959	0.168338	0.0290453
KCNH6	s37492	1.01958	0.303779	0.956663
KCNK7	s195015	0.932454	0.27686	0.646614
KCNK7	s195014	0.883847	0.237344	0.387812
KCNK7	s195013	0.626677	0.183593	0.0108473
L3MBTL2	s38178	1.41439	0.245315	0.025149
L3MBTL2	s38177	0.819838	0.17849	0.116321
L3MBTL2	s38176	0.595401	0.227771	0.0194322
MAPK8IP3	s23167	1.05734	0.28589	0.734688
MAPK8IP3	s23166	0.923452	0.534418	0.781564
MAPK8IP3	s23168	0.860093	0.27056	0.361565
MGAT5	s8740	1.21926	0.247731	0.233174
MGAT5	s8739	0.72803	0.104494	0.233763
MGAT5	s8738	0.660984	0.206902	0.158633
MKNK2	s6095	0.955005	0.418665	0.666073
MKNK2	s6093	0.693496	0.463535	0.372489
MKNK2	s6094	0.624576	0.294323	0.0750523
OSGEP	s31152	0.77436	0.273323	0.480567
OSGEP	s31153	0.692109	0.304094	0.317888
OSGEP	s31154	0.489949	0.223203	0.0043917
P4HA1	s9975	0.722844	0.258046	0.238042
P4HA1	s9977	0.610091	0.302998	0.129959
P4HA1	s224154	0.601754	0.290456	0.082962
PCDH18	s29107	1.01987	0.266935	0.781806
PCDH18	s29106	0.954097	0.082771	0.966362
PCDH18	s29108	0.638244	0.180654	0.128612
PEX6	s10311	0.847523	0.265722	0.165223
PEX6	s10309	0.674814	0.227211	0.0245767
PEX6	s10310	0.639328	0.334221	0.0517504
PLCH2	s18564	1.63887	0.278914	0.0749211
PLCH2	s18563	1.01025	0.0948089	0.582061
PLCH2	s18565	0.747602	0.180596	0.215014
PLCL2	s23334	0.993308	0.32085	0.849572
PLCL2	s23336	0.683122	0.321322	0.0899987
PLCL2	s23335	0.585788	0.286333	0.0269137
PLD3	s24272	1.2248	0.292654	0.245164
PLD3	s24273	1.14043	0.284244	0.414459
PLD3	s24271	0.709203	0.151118	0.210885
POLR3G	s20865	0.779463	0.202387	0.0235689
POLR3G	s20864	0.516296	0.159748	0.000134795
POLR3G	s20863	0.27857	0.10308	5.38508e-06
PPP1R8	s10954	0.732102	0.375293	0.0803844
PPP1R8	s10955	0.680613	0.149017	0.00185819
PPP1R8	s10956	0.389531	0.183624	3.40689e-05
PSMC2	s11371	2.55889	0.829665	0.00413773
PSMC2	s11373	2.01326	0.51073	0.00317645
PSMC2	s11372	1.28659	0.568121	0.402218
PSMC4	s11378	1.67671	0.491784	0.0231243
PSMC4	s11379	1.23988	0.38778	0.358134
PSMC4	s11377	0.709949	0.18919	0.00596137
PSMD6	s19093	2.22803	0.771788	0.00975552
PSMD6	s19092	1.98162	0.411799	0.000999357
PSMD6	s19094	1.16203	0.374682	0.601493
RAB28	s17911	2.83762	0.465879	6.30861e-05
RAB28	s17912	1.39751	0.145434	0.0543792
RAB28	s17910	0.677876	0.276309	0.205682
RGS6	s18504	0.967518	0.214372	0.952151
RGS6	s18505	0.720915	0.266365	0.107696
RGS6	s18503	0.554551	0.291273	0.0122022
RNF4	s12074	1.17965	0.456491	0.427069
RNF4	s12073	1.08461	0.298156	0.57664
RNF4	s12075	0.655505	0.0495514	0.135958
RUVBL2	s21309	1.05946	0.540697	0.880634
RUVBL2	s21307	0.782436	0.382867	0.186335
RUVBL2	s21308	0.7428	0.14997	0.0270707
SETD1A	s18789	1.19357	0.421873	0.424038
SETD1A	s18790	0.814577	0.11337	0.0322538
SETD1A	s18788	0.741449	0.20474	0.0614667
SNRPD1	s13229	1.20223	0.646278	0.574184
SNRPD1	s13230	0.57907	0.104151	0.000290132
SNRPD1	s224661	0.310351	0.160902	0.000232235
SUV39H1	s13659	1.73739	0.551687	0.0554648
SUV39H1	s13660	1.05063	0.330847	0.795339
SUV39H1	s13658	0.803007	0.187951	0.104686
TPMT	s14347	1.15017	0.298991	0.392974
TPMT	s14348	0.962121	0.442258	0.862704
TPMT	s14349	0.441597	0.186427	0.00184494
TSC2	s14436	0.916254	0.148278	0.34929
TSC2	s14438	0.85933	0.278968	0.371819
TSC2	s14437	0.49846	0.207509	0.00537911
VCP	s14765	1.522	0.517291	0.111515
VCP	s14766	0.962653	0.199207	0.995715
VCP	s14767	0.822215	0.331062	0.544833
